# Supplementary material
Source: PubMed Central journal article supplement (PMC10387958)
Supplement: jmcp.2023.29.5.519_s001.pdf [file jmcp.2023.29.5.519_s001.pdf]

## SUPPLEMENTARY MATERIALS

### Burden of lipoprotein(a) for patients with atherosclerotic cardiovascular disease: A retrospective analysis from the United States

Ana F Fonseca, MS; Hannah Byrne, MS; Andres Laguna, PhD; Taha Itani, PhD; Rachel Studer, PhD; Jihaeng Heo, PhD; Allison Dillon, MS; Philippe Ferber, PhD; Madlaina Costa-Scharplatz, PhD

**Figure 1: Study design overview**

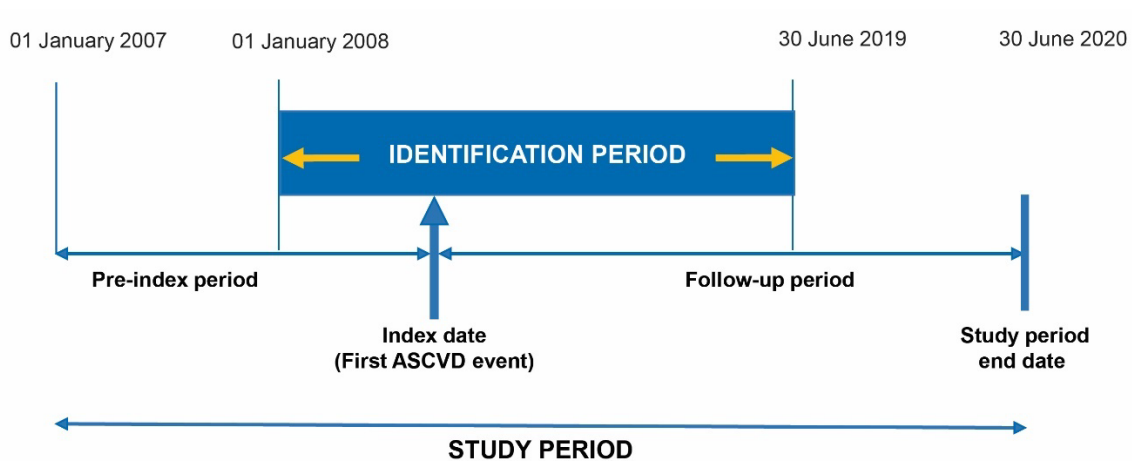

Identification period: Patients with first ASCVD event were identified during this time; Index date: First ASCVD event in the identification period following 12 months of continuous enrollment. Follow-up period: Up to one year from the index date, until the end of enrollment or the end of the study period, whichever occurred first.

**Figure 2: Patient flow diagram**

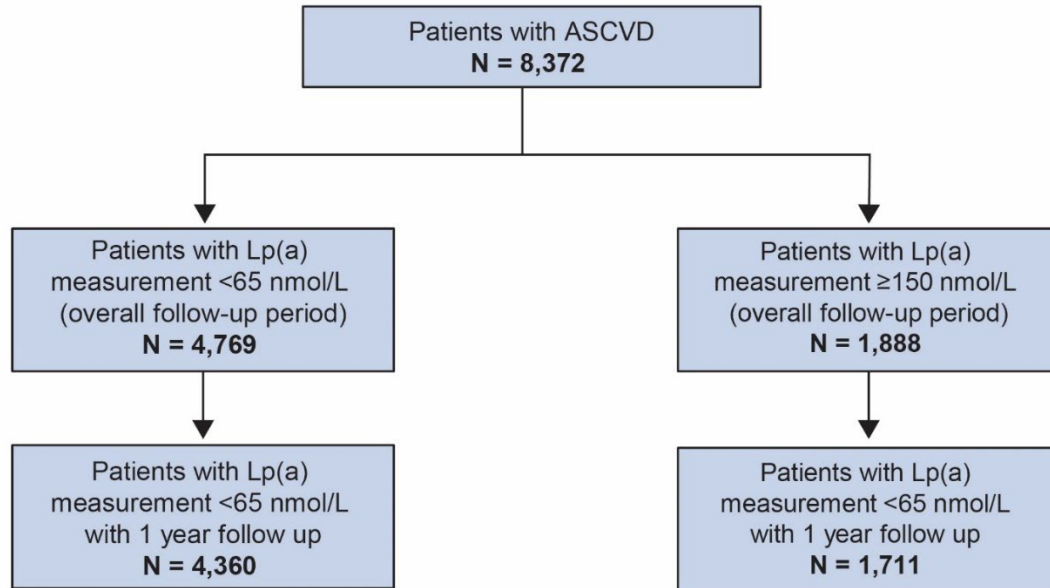

ASCVD: Atherosclerotic cardiovascular disease, Lp(a): Lipoprotein (a)

**Figure 3: Rate of inpatient hospitalizations per 100 person-years for subgroup of patients with MI index diagnosis, at one-year of follow up**

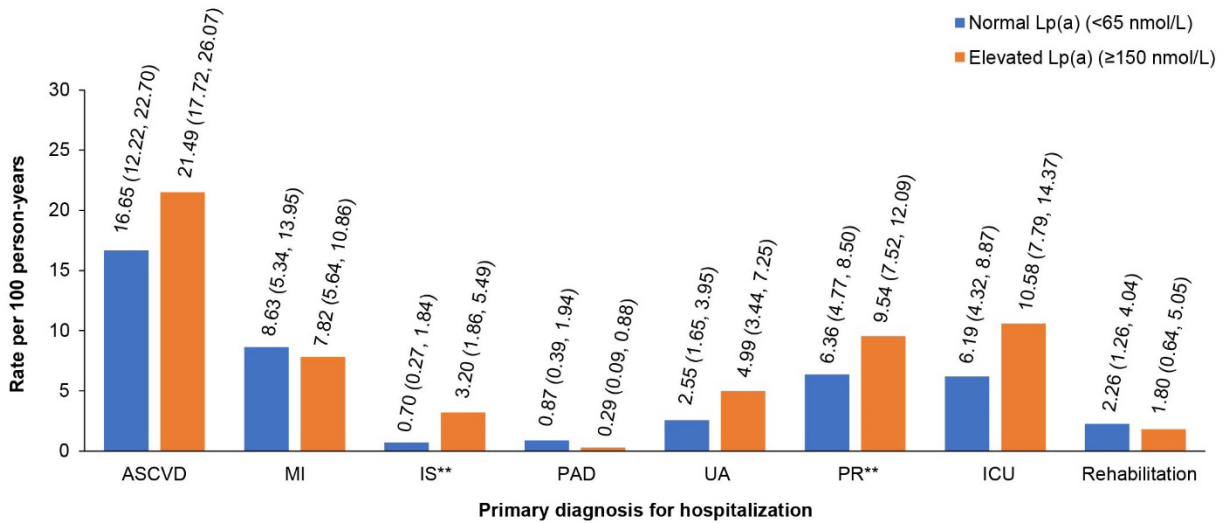

**Abbreviations:** ASCVD, Atherosclerotic Cardiovascular Disease; ICU, Intensive Care Unit; IS, Ischemic Stroke; MI, Myocardial Infarction; PAD, Peripheral Artery Disease; PR, Post Revascularization; UA, Unstable Angina

Note: Annualized rate was calculated as the number of encounters divided by person-years in follow-up. Poisson regression was used with Lp(a) group as the primary exposure, using log follow-up time as an offset. Variances were calculated with a robust sandwich estimator. 95% confidence intervals (CI) and p-values comparing incidence rates for normal and elevated Lp(a) groups come directly from the regression model. Adjusted incidence rates for the normal and elevated Lp(a) groups are the least-squares means centered at the mean covariate values in our dataset. Covariate adjustment was done for age (as continuous), sex, baseline statin use, and baseline diabetes. \*\*Elevated Lp(a) *versus* normal Lp(a) group p-value <0.05.

**Figure 4: Rate of inpatient hospitalizations per 100 person-years for subgroup of patients with PAD index diagnosis, at one-year of follow up**

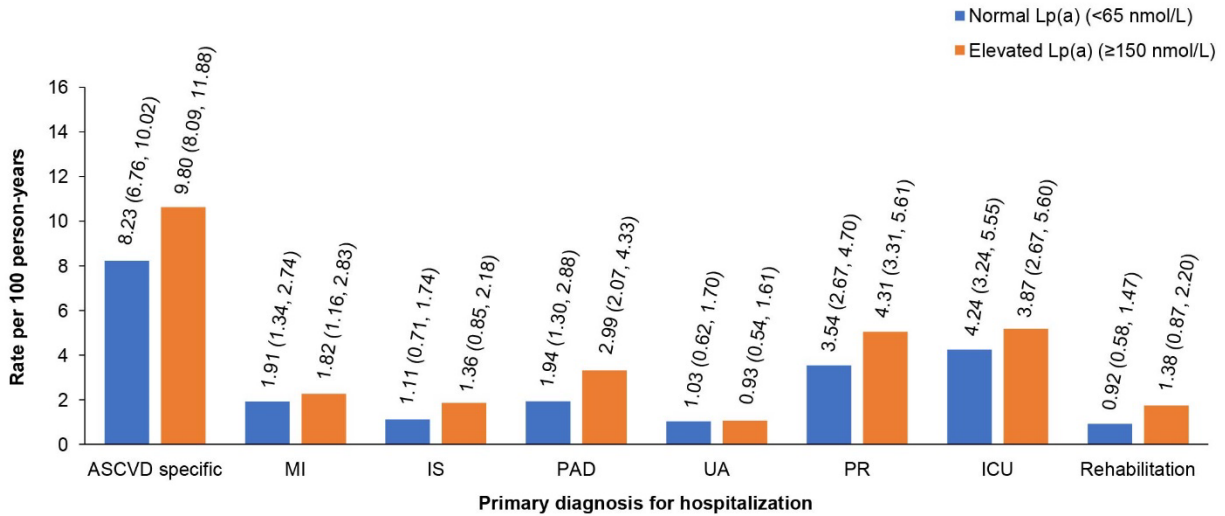

**Abbreviations:** ASCVD, Atherosclerotic Cardiovascular Disease; ICU, Intensive Care Unit; IS, Ischemic Stroke; MI, Myocardial Infarction; PAD, Peripheral Artery Disease; PR, Post Revascularization; UA, Unstable Angina

Note: Annualized rate was calculated as the number of encounters divided by person-years in follow-up. Poisson regression was used with Lp(a) group as the primary exposure, using log follow-up time as an offset. Variances were calculated with a robust sandwich estimator. 95% confidence intervals (CI) and p-values comparing incidence rates for normal and elevated Lp(a) groups come directly from the regression model. Adjusted incidence rates for the normal and elevated Lp(a) groups are the least-squares means centered at the mean covariate values in our dataset. Covariate adjustment was done for age (as continuous), sex, baseline statin use, and baseline diabetes.

**Figure 5: Rate of inpatient hospitalizations per 100 person-years for subgroup of patients with IS index diagnosis, at one-year of follow up**

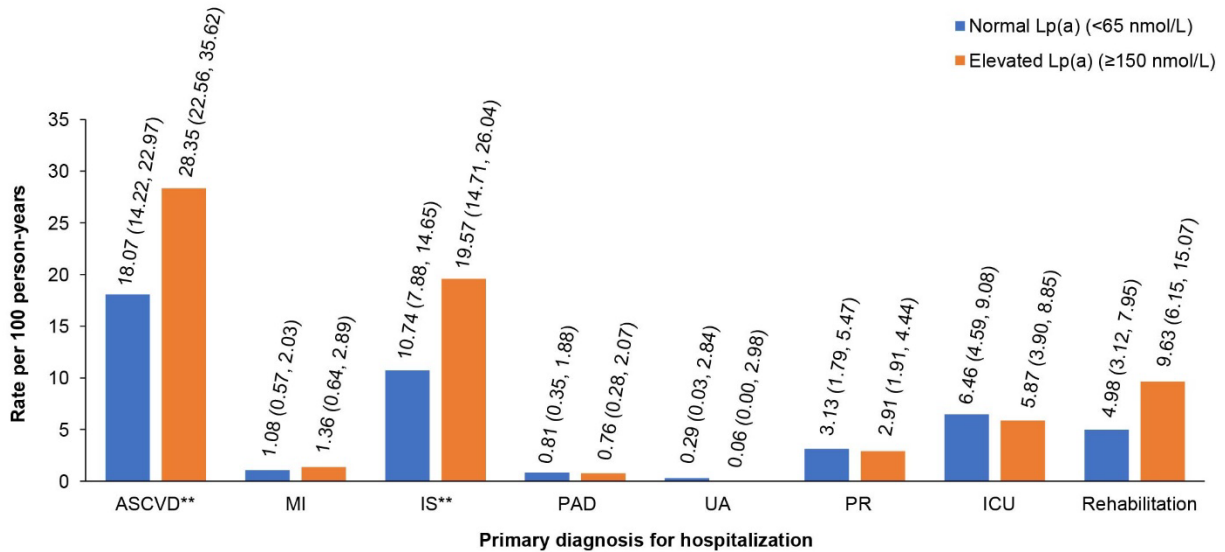

**Abbreviations:** ASCVD, Atherosclerotic Cardiovascular Disease; ICU, Intensive Care Unit; IS, Ischemic Stroke; MI, Myocardial Infarction; PAD, Peripheral Artery Disease; PR, Post Revascularization; UA, Unstable Angina

Note: Annualized rate was calculated as the number of encounters divided by person-years in follow-up. Poisson regression was used with Lp(a) group as the primary exposure, using log follow-up time as an offset. Variances were calculated with a robust sandwich estimator. 95% confidence intervals (CI) and p-values comparing incidence rates for normal and elevated Lp(a) groups come directly from the regression model. Adjusted incidence rates for the normal and elevated Lp(a) groups are the least-squares means centered at the mean covariate values in our dataset. Covariate adjustment was done for age (as continuous), sex, baseline statin use, and baseline diabetes. \*\*Elevated Lp(a) versus normal Lp(a) group p-value <0.05.

**Figure 6: Rate of outpatient visits per 100 person years for patients with normal and elevated Lp(a), with one-year of follow up**

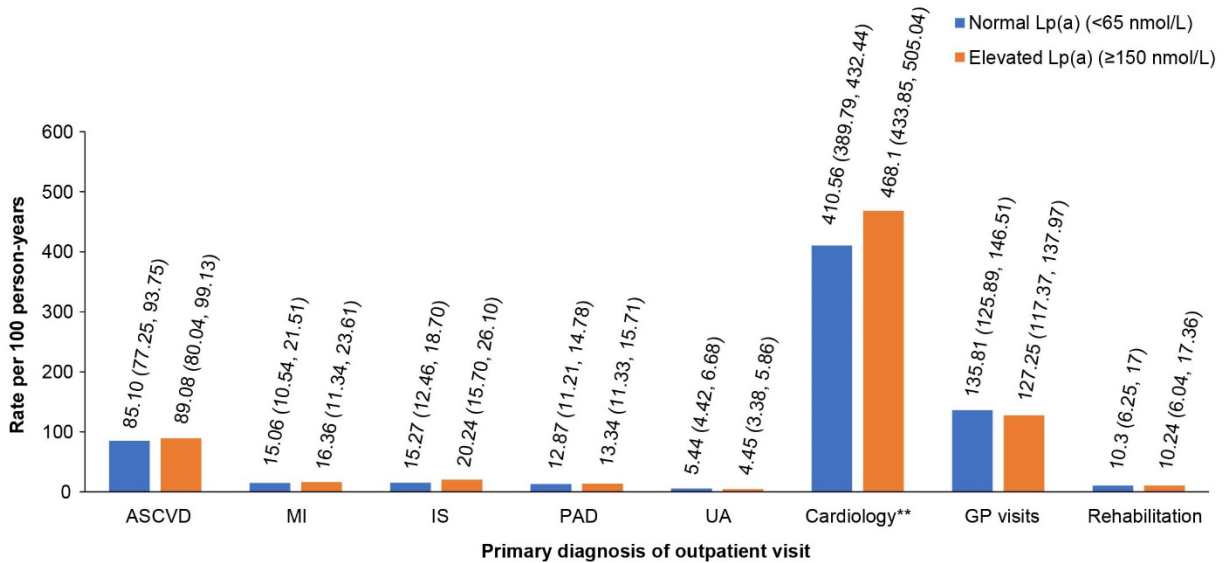

**Abbreviations:** ASCVD, Atherosclerotic Cardiovascular Disease; GP, General Practitioner; IS, Ischemic Stroke; MI, Myocardial Infarction; PAD, Peripheral Artery Disease; PR, Post Revascularization; UA, Unstable Angina

Note: Annualized rate was calculated as the number of encounters divided by person-years in follow-up. Poisson regression was used with Lp(a) group as the primary exposure, using log follow-up time as an offset. Variances were calculated with a robust sandwich estimator. 95% confidence intervals (CI) and p-values comparing incidence rates for normal and elevated Lp(a) groups come directly from the regression model. Adjusted incidence rates for the normal and elevated Lp(a) groups are the least-squares means centered at the mean covariate values in our dataset. Covariate adjustment was done for age (as continuous), sex, baseline statin use, and baseline diabetes.

\*\*Elevated Lp(a) *versus* normal Lp(a) group p-value <0.05.

**Figure 7: Rate of emergency room (ER) visits per 100 person years for patients with normal and elevated Lp(a), with one-year of follow up**

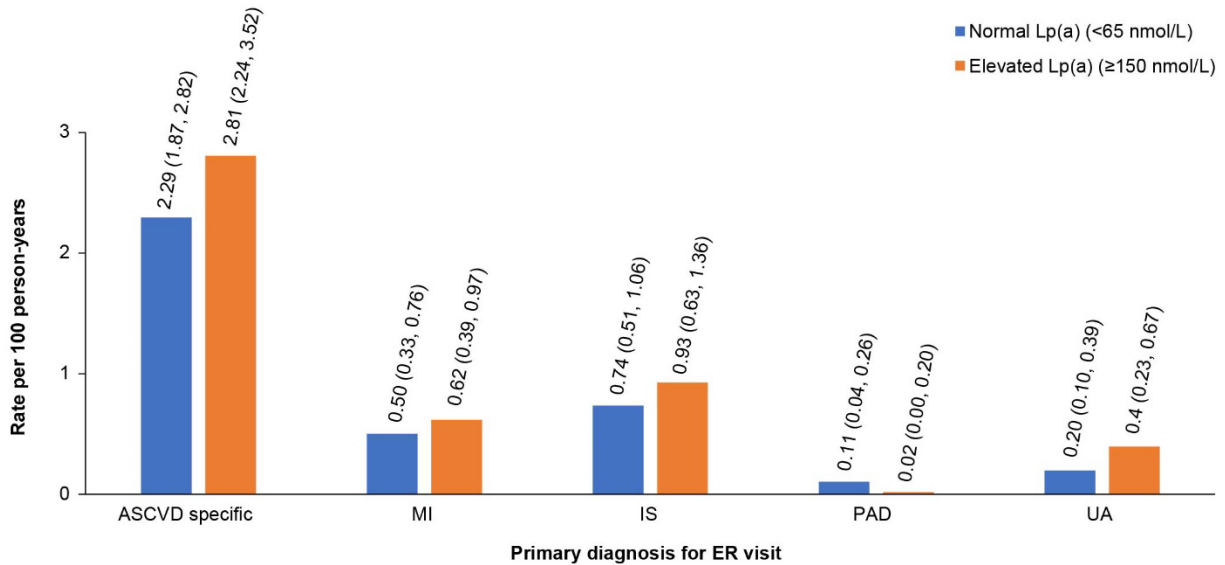

**Abbreviations:** ASCVD, Atherosclerotic Cardiovascular Disease; IS, Ischemic Stroke; MI, Myocardial Infarction; PAD, Peripheral Artery Disease; UA, Unstable Angina

Note: Annualized rate was calculated as the number of encounters divided by person-years in follow-up. Poisson regression was used with Lp(a) group as the primary exposure, using log follow-up time as an offset. Variances were calculated with a robust sandwich estimator. 95% confidence intervals (CI) and p-values comparing incidence rates for normal and elevated Lp(a) groups come directly from the regression model. Adjusted incidence rates for the normal and elevated Lp(a) groups are the least-squares means centered at the mean covariate values in our dataset. Covariate adjustment was done for age (as continuous), sex, baseline statin use, and baseline diabetes.

**Table 1: Baseline demographics for ASCVD patients with index diagnoses of MI, PAD or IS and one-year of follow-up, stratified by Lp(a) <65 nmol/L and ≥150 nmol/L**

| Characteristics                     | MI (N=1,322)     |                   |         | PAD (N=2,691)    |                   |         | IS (N=1,106)     |                   |         |
|-------------------------------------|------------------|-------------------|---------|------------------|-------------------|---------|------------------|-------------------|---------|
|                                     | Lp(a) <65 nmol/L | Lp(a) ≥150 nmol/L | p-value | Lp(a) <65 nmol/L | Lp(a) ≥150 nmol/L | p-value | Lp(a) <65 nmol/L | Lp(a) ≥150 nmol/L | p-value |
| <b>Total, n</b>                     | 888              | 434               |         | 1938             | 753               |         | 779              | 327               |         |
| <b>Age, mean (SD)</b>               | 66.52 (11.94)    | 66.90 (11.09)     | 0.5787  | 69.76 (11.24)    | 69.41 (10.68)     | 0.5057  | 68.54 (12.29)    | 68.09 (12.29)     | 0.5764  |
| <b>Gender, n (%)</b>                |                  |                   |         |                  |                   |         |                  |                   |         |
| Male                                | 564 (63.51)      | 232 (53.46)       | 0.0005  | 917 (47.32)      | 283 (37.58)       | <.0001  | 371 (47.63)      | 128 (39.14)       | 0.0099  |
| Female                              | 324 (36.49)      | 202 (46.54)       |         | 1021 (52.68)     | 470 (62.42)       |         | 408 (52.37)      | 199 (60.86)       |         |
| <b>Health Plan Type, n (%)</b>      |                  |                   |         |                  |                   |         |                  |                   |         |
| Commercial                          | 303 (34.12)      | 147 (33.87)       | 0.8547  | 489 (25.23)      | 185 (24.57)       | 0.9443  | 204 (26.19)      | 73 (22.32)        | 0.1185  |
| Medicare                            | 585 (65.88)      | 286 (65.90)       |         | 1447 (74.66)     | 567 (75.30)       |         | 574 (73.68)      | 254 (77.68)       |         |
| <b>Index ASCVD Diagnosis, n (%)</b> |                  |                   |         |                  |                   |         |                  |                   |         |
| MI, PAD, or Ischemic Stroke         | 888 (100.00)     | 434 (100.00)      | NA      | 1938 (100.00)    | 753 (100.00)      | NA      | 779 (100.00)     | 327 (100.00)      | NA      |
| MI                                  | 888 (100.00)     | 434 (100.00)      | NA      | 311 (16.05)      | 138 (18.33)       | 0.1669  | 126 (16.17)      | 79 (24.16)        | 0.0022  |
| PAD                                 | 304 (34.23)      | 142 (32.72)       | 0.6203  | 1938 (100.00)    | 753 (100.00)      | NA      | 252 (32.35)      | 127 (38.84)       | 0.0440  |
| IS                                  | 125 (14.08)      | 81 (18.66)        | 0.0356  | 249 (12.85)      | 128 (17.00)       | 0.0064  | 779 (100.00)     | 327 (100.00)      | NA      |
| TIA                                 | 38 (4.28)        | 15 (3.46)         | 0.5515  | 89 (4.59)        | 22 (2.92)         | 0.0521  | 107 (13.74)      | 29 (8.87)         | 0.0270  |
| Unstable Angina                     | 52 (5.86)        | 36 (8.29)         | 0.1006  | 73 (3.77)        | 30 (3.98)         | 0.8230  | 20 (2.57)        | 17 (5.20)         | 0.0418  |
| Stable Angina                       | 94 (10.59)       | 48 (11.06)        | 0.7776  | 174 (8.98)       | 66 (8.76)         | 0.9400  | 55 (7.06)        | 23 (7.03)         | 1.0000  |
| Post-revascularization              | 61 (6.87)        | 36 (8.29)         | 0.3695  | 61 (3.15)        | 31 (4.12)         | 0.2370  | 19 (2.44)        | 10 (3.06)         | 0.5415  |
| Index Diagnosis not MI, PAD, or IS  | 173 (19.48)      | 88 (20.28)        | 0.7686  | 302 (15.58)      | 109 (14.48)       | 0.5115  | 170 (21.82)      | 61 (18.65)        | 0.2569  |
| <b>Procedures, n (%)</b>            |                  |                   |         |                  |                   |         |                  |                   |         |
| Dialysis                            | 19 (2.14)        | 5 (1.15)          | 0.2009  | 29 (1.50)        | 14 (1.86)         | 0.6117  | 8 (1.03)         | 8 (2.45)          | 0.0949  |



| Characteristics                                                 | MI (N=1,322)     |                   |         | PAD (N=2,691)    |                   |         | IS (N=1,106)     |                   |         |
|-----------------------------------------------------------------|------------------|-------------------|---------|------------------|-------------------|---------|------------------|-------------------|---------|
|                                                                 | Lp(a) <65 nmol/L | Lp(a) ≥150 nmol/L | p-value | Lp(a) <65 nmol/L | Lp(a) ≥150 nmol/L | p-value | Lp(a) <65 nmol/L | Lp(a) ≥150 nmol/L | p-value |
| Revascularization                                               | 270 (30.41)      | 153 (35.25)       | 0.2638  | 145 (7.48)       | 81 (10.76)        | 0.0722  | 57 (7.32)        | 39 (11.93)        | 0.0058  |
| <b>Baseline Medications, n (%)</b>                              |                  |                   |         |                  |                   |         |                  |                   |         |
| Statin                                                          | 473 (53.27)      | 252 (58.06)       | 0.1120  | 971 (50.10)      | 466 (61.89)       | <.0001  | 361 (46.34)      | 184 (56.27)       | 0.0030  |
| ACEIs/ARBs                                                      | 441 (49.66)      | 211 (48.62)       | 0.7257  | 916 (47.27)      | 377 (50.07)       | 0.1975  | 358 (45.96)      | 155 (47.40)       | 0.6919  |
| Beta-blockers                                                   | 354 (39.86)      | 186 (42.86)       | 0.3114  | 630 (32.51)      | 273 (36.25)       | 0.0689  | 260 (33.38)      | 128 (39.14)       | 0.0727  |
| Anti-platelets                                                  | 131 (14.75)      | 61 (14.06)        | 0.8032  | 185 (9.55)       | 95 (12.62)        | 0.0204  | 90 (11.55)       | 50 (15.29)        | 0.0926  |
| Fibrates                                                        | 44 (4.95)        | 17 (3.92)         | 0.4854  | 110 (5.68)       | 21 (2.79)         | 0.0013  | 36 (4.62)        | 13 (3.98)         | 0.7493  |
| Ezetimibe                                                       | 33 (3.72)        | 19 (4.38)         | 0.5502  | 57 (2.94)        | 40 (5.31)         | 0.0054  | 16 (2.05)        | 15 (4.59)         | 0.0270  |
| PCSK9i (alirocumab, evolocumab)                                 | 3 (0.34)         | 2 (0.46)          | 0.6656  | 4 (0.21)         | 4 (0.53)          | 0.2309  | 2 (0.26)         | 2 (0.61)          | 0.5861  |
| None of the above treatments                                    | 224 (25.23)      | 104 (23.96)       | 0.6356  | 496 (25.59)      | 152 (20.19)       | 0.0031  | 210 (26.96)      | 73 (22.32)        | 0.1132  |
| <b>Lab values, mean (SD)<sup>†</sup></b>                        |                  |                   |         |                  |                   |         |                  |                   |         |
| LDL-C (mg/dL)                                                   | 97.25 (37.60)    | 106.21 (41.84)    | 0.0064  | 99.49 (38.38)    | 106.28 (40.70)    | 0.0016  | 102.08 (38.83)   | 111.28 (43.30)    | 0.0257  |
| HDL-C (mg/dL)                                                   | 50.61 (16.30)    | 53.06 (15.43)     | 0.0848  | 54.97 (18.28)    | 58.79 (18.89)     | 0.0002  | 55.53 (18.80)    | 57.31 (19.98)     | 0.3384  |
| Total Cholesterol (mg/dL)                                       | 177.24 (45.87)   | 187.90 (50.46)    | 0.0105  | 180.42 (46.01)   | 190.7 (46.74)     | <.0001  | 184.34 (46.17)   | 195.99 (51.48)    | 0.0115  |
| Triglycerides (mg/dL)                                           | 147.94 (108.92)  | 146.47 (109.21)   | 0.8803  | 134.80 (83.52)   | 132.90 (127.84)   | 0.7741  | 137.44 (93.19)   | 143.85 (85.62)    | 0.4752  |
| Hs-CRP(mg/L)                                                    | 8.84 (24.35)     | 4.49 (4.87)       | 0.0852  | 5.53 (17.80)     | 4.18 (5.87)       | 0.2305  | 7.36 (25.01)     | 5.51 (6.95)       | 0.5091  |
| <b>Baseline cardiovascular comorbidities, n (%)<sup>‡</sup></b> |                  |                   |         |                  |                   |         |                  |                   |         |
| Atrial fibrillation                                             | 130 (14.64)      | 69 (15.90)        | 0.5668  | 267 (13.78)      | 88 (11.69)        | 0.1453  | 101 (12.97)      | 57 (17.43)        | 0.0596  |
| Cardiac Amyloidosis                                             | 2 (0.23)         | 1 (0.23)          | 1.0000  | 3 (0.15)         | 2 (0.27)          | 0.6234  | 4 (0.51)         | 0.00 (0.00)       | 0.3256  |

| Characteristics                     | MI (N=1,322)     |                   |         | PAD (N=2,691)    |                   |         | IS (N=1,106)     |                   |         |
|-------------------------------------|------------------|-------------------|---------|------------------|-------------------|---------|------------------|-------------------|---------|
|                                     | Lp(a) <65 nmol/L | Lp(a) ≥150 nmol/L | p-value | Lp(a) <65 nmol/L | Lp(a) ≥150 nmol/L | p-value | Lp(a) <65 nmol/L | Lp(a) ≥150 nmol/L | p-value |
| Hypertension                        | 712 (80.18)      | 348 (80.18)       | 1.0000  | 1590 (82.04)     | 629 (83.53)       | 0.3970  | 648 (83.18)      | 272 (83.18)       | 1.0000  |
| Chronic Kidney disease (Stage III)  | 105 (11.82)      | 64 (14.75)        | 0.1369  | 319 (16.46)      | 153 (20.32)       | 0.0206  | 98 (12.58)       | 55 (16.82)        | 0.0697  |
| Chronic Kidney Disease (Stage IV-V) | 39 (4.39)        | 9 (2.07)          | 0.0408  | 81 (4.18)        | 30 (3.98)         | 0.9141  | 27 (3.47)        | 11 (3.36)         | 1.0000  |
| Heart failure                       | 167 (18.81)      | 94 (21.66)        | 0.2392  | 343 (17.70)      | 144 (19.12)       | 0.3441  | 117 (15.02)      | 69 (21.10)        | 0.0109  |
| Aortic Valve Stenosis               | 85 (9.57)        | 37 (8.53)         | 0.6130  | 215 (11.09)      | 94 (12.48)        | 0.3128  | 87 (11.17)       | 42 (12.84)        | 0.4724  |

ASCVD: Atherosclerotic Cardiovascular Disease, ACEIs: Angiotensin-converting enzyme inhibitor, ARBs: Angiotensin II receptor blockers, HDL-C: High-density lipoprotein cholesterol, hs-CRP: High-sensitivity C-reactive Protein, LDL-C: Low-density lipoprotein cholesterol, MI: Myocardial Infarction, PAD: Peripheral artery disease, IS: Ischemic stroke, TIA: Transient ischemic attack, SD: standard deviation

† This endpoint was identified in the baseline period (12 months prior to the index date, including the index date).

‡ This endpoint was identified any time prior to the index date, not including index date.

**Table 2: ASCVD ICD code list**

| <b>Disease</b>               | <b>Code Type</b> | <b>Code</b> | <b>Description</b>                                                                       |
|------------------------------|------------------|-------------|------------------------------------------------------------------------------------------|
| <b>Myocardial Infarction</b> | ICD-9-CM         | 410         | Acute myocardial infarction                                                              |
|                              | ICD-9-CM         | 410.0       | Acute myocardial infarction of anterolateral wall                                        |
|                              | ICD-9-CM         | 410.00      | Acute myocardial infarction of anterolateral wall, episode of care unspecified           |
|                              | ICD-9-CM         | 410.01      | Acute myocardial infarction of anterolateral wall, initial episode of care               |
|                              | ICD-9-CM         | 410.02      | Acute myocardial infarction of anterolateral wall, subsequent episode of care            |
|                              | ICD-9-CM         | 410.1       | Acute myocardial infarction of other anterior wall                                       |
|                              | ICD-9-CM         | 410.10      | Acute myocardial infarction of other anterior wall, episode of care unspecified          |
|                              | ICD-9-CM         | 410.11      | Acute myocardial infarction of other anterior wall, initial episode of care              |
|                              | ICD-9-CM         | 410.12      | Acute myocardial infarction of other anterior wall, subsequent episode of care           |
|                              | ICD-9-CM         | 410.2       | Acute myocardial infarction of inferolateral wall                                        |
|                              | ICD-9-CM         | 410.20      | Acute myocardial infarction of inferolateral wall, episode of care unspecified           |
|                              | ICD-9-CM         | 410.21      | Acute myocardial infarction of inferolateral wall, initial episode of care               |
|                              | ICD-9-CM         | 410.22      | Acute myocardial infarction of inferolateral wall, subsequent episode of care            |
|                              | ICD-9-CM         | 410.3       | Acute myocardial infarction of inferoposterior wall                                      |
|                              | ICD-9-CM         | 410.30      | Acute myocardial infarction of inferoposterior wall, episode of care unspecified         |
|                              | ICD-9-CM         | 410.31      | Acute myocardial infarction of inferoposterior wall, initial episode of care             |
|                              | ICD-9-CM         | 410.32      | Acute myocardial infarction of inferoposterior wall, subsequent episode of care          |
|                              | ICD-9-CM         | 410.4       | Acute myocardial infarction of other inferior wall                                       |
|                              | ICD-9-CM         | 410.40      | Acute myocardial infarction of other inferior wall, episode of care unspecified          |
|                              | ICD-9-CM         | 410.41      | Acute myocardial infarction of other inferior wall, initial episode of care              |
|                              | ICD-9-CM         | 410.42      | Acute myocardial infarction of other inferior wall, subsequent episode of care           |
|                              | ICD-9-CM         | 410.5       | Acute myocardial infarction of other lateral wall                                        |
|                              | ICD-9-CM         | 410.50      | Acute myocardial infarction of other lateral wall, episode of care unspecified           |
|                              | ICD-9-CM         | 410.51      | Acute myocardial infarction of other lateral wall, initial episode of care               |
|                              | ICD-9-CM         | 410.52      | Acute myocardial infarction of other lateral wall, subsequent episode of care            |
|                              | ICD-9-CM         | 410.6       | Acute myocardial infarction, true posterior wall infarction                              |
|                              | ICD-9-CM         | 410.60      | Acute myocardial infarction, true posterior wall infarction, episode of care unspecified |
|                              | ICD-9-CM         | 410.61      | Acute myocardial infarction, true posterior wall infarction, initial episode of care     |

|           |        |                                                                                               |
|-----------|--------|-----------------------------------------------------------------------------------------------|
| ICD-9-CM  | 410.62 | Acute myocardial infarction, true posterior wall infarction, subsequent episode of care       |
| ICD-9-CM  | 410.7  | Acute myocardial infarction, subendocardial infarction                                        |
| ICD-9-CM  | 410.70 | Acute myocardial infarction, subendocardial infarction, episode of care unspecified           |
| ICD-9-CM  | 410.71 | Acute myocardial infarction, subendocardial infarction, initial episode of care               |
| ICD-9-CM  | 410.72 | Acute myocardial infarction, subendocardial infarction, subsequent episode of care            |
| ICD-9-CM  | 410.8  | Acute myocardial infarction of other specified sites                                          |
| ICD-9-CM  | 410.80 | Acute myocardial infarction of other specified sites, episode of care unspecified             |
| ICD-9-CM  | 410.81 | Acute myocardial infarction of other specified sites, initial episode of care                 |
| ICD-9-CM  | 410.82 | Acute myocardial infarction of other specified sites, subsequent episode of care              |
| ICD-9-CM  | 410.9  | Acute myocardial infarction, unspecified site                                                 |
| ICD-9-CM  | 410.90 | Acute myocardial infarction, unspecified site, episode of care unspecified                    |
| ICD-9-CM  | 410.91 | Acute myocardial infarction, unspecified site, initial episode of care                        |
| ICD-9-CM  | 410.92 | Acute myocardial infarction, unspecified site, subsequent episode of care                     |
| ICD-9-CM  | 412    | Old myocardial infarction                                                                     |
| ICD-9-CM  | 429.79 | Other sequelae of myocardial infarction, not elsewhere classified                             |
| ICD-10-CM | I21    | ST elevation (STEMI) and non-ST elevation (NSTEMI) myocardial infarction                      |
| ICD-10-CM | I21.0  | ST elevation (STEMI) myocardial infarction of anterior wall                                   |
| ICD-10-CM | I21.01 | ST elevation (STEMI) myocardial infarction involving left main coronary artery                |
| ICD-10-CM | I21.02 | ST elevation (STEMI) myocardial infarction involving left anterior descending coronary artery |
| ICD-10-CM | I21.09 | ST elevation (STEMI) myocardial infarction involving other coronary artery of anterior wall   |
| ICD-10-CM | I21.1  | ST elevation (STEMI) myocardial infarction of inferior wall                                   |
| ICD-10-CM | I21.11 | ST elevation (STEMI) myocardial infarction involving right coronary artery                    |
| ICD-10-CM | I21.19 | ST elevation (STEMI) myocardial infarction involving other coronary artery of inferior wall   |
| ICD-10-CM | I21.2  | ST elevation (STEMI) myocardial infarction of other sites                                     |
| ICD-10-CM | I21.21 | ST elevation (STEMI) myocardial infarction involving left circumflex coronary artery          |
| ICD-10-CM | I21.29 | ST elevation (STEMI) myocardial infarction involving other sites                              |
| ICD-10-CM | I21.3  | ST elevation (STEMI) myocardial infarction of unspecified site                                |
| ICD-10-CM | I21.4  | Non-ST elevation (NSTEMI) myocardial infarction                                               |
| ICD-10-CM | I21.9  | Acute myocardial infarction, unspecified                                                      |
| ICD-10-CM | I21.A  | Other type of myocardial infarction                                                           |
| ICD-10-CM | I21.A1 | Myocardial infarction type 2                                                                  |
| ICD-10-CM | I21.A9 | Other myocardial infarction type                                                              |
| ICD-10-CM | I22    | Subsequent STEMI & NSTEMI myocardial infarction                                               |

|                        |           |                                                         |                                                                                                                         |
|------------------------|-----------|---------------------------------------------------------|-------------------------------------------------------------------------------------------------------------------------|
|                        | ICD-10-CM | I22.0                                                   | Subsequent ST elevation (STEMI) myocardial infarction of anterior wall                                                  |
|                        | ICD-10-CM | I22.1                                                   | Subsequent ST elevation (STEMI) myocardial infarction of inferior wall                                                  |
|                        | ICD-10-CM | I22.2                                                   | Subsequent non-ST elevation (NSTEMI) myocardial infarction                                                              |
|                        | ICD-10-CM | I22.8                                                   | Subsequent STEMI of sites                                                                                               |
|                        | ICD-10-CM | I22.9                                                   | Subsequent ST elevation (STEMI) myocardial infarction of unspecified site                                               |
|                        | ICD-10-CM | I23.0                                                   | Hemopericardium as current complication following acute myocardial infarction                                           |
|                        | ICD-10-CM | I23.1                                                   | Atrial septal defect as current complication following acute myocardial infarction                                      |
|                        | ICD-10-CM | I23.2                                                   | Ventricular septal defect as current complication following acute myocardial infarction                                 |
|                        | ICD-10-CM | I23.3                                                   | Rupture of cardiac wall without hemopericardium as current complication following acute myocardial infarction           |
|                        | ICD-10-CM | I23.4                                                   | Rupture of chordae tendineae as current complication following acute myocardial infarction                              |
|                        | ICD-10-CM | I23.5                                                   | Rupture of papillary muscle as current complication following acute myocardial infarction                               |
|                        | ICD-10-CM | I23.6                                                   | Thrombosis of atrium, auricular appendage, and ventricle as current complications following acute myocardial infarction |
|                        | ICD-10-CM | I23.7                                                   | Postinfarction angina                                                                                                   |
|                        | ICD-10-CM | I23.8                                                   | Other current complications following acute myocardial infarction                                                       |
|                        | ICD-10-CM | I25.2                                                   | Old myocardial infarction                                                                                               |
| <b>Ischemic Stroke</b> | ICD-9-CM  | 433.01                                                  | Occlusion and stenosis of basilar artery with cerebral infarction                                                       |
|                        | ICD-9-CM  | 433.11                                                  | Occlusion and stenosis of carotid artery with cerebral infarction                                                       |
|                        | ICD-9-CM  | 433.21                                                  | Occlusion and stenosis of vertebral artery with cerebral infarction                                                     |
|                        | ICD-9-CM  | 433.31                                                  | Occlusion and stenosis of multiple and bilateral precerebral arteries with cerebral infarction                          |
|                        | ICD-9-CM  | 433.81                                                  | Occlusion and stenosis of other specified precerebral artery with cerebral infarction                                   |
|                        | ICD-9-CM  | 433.91                                                  | Occlusion and stenosis of unspecified precerebral artery with cerebral infarction                                       |
|                        | ICD-9-CM  | 434.01                                                  | Cerebral thrombosis with cerebral infarction                                                                            |
|                        | ICD-9-CM  | 434.11                                                  | Cerebral embolism with cerebral infarction                                                                              |
|                        | ICD-9-CM  | 434.91                                                  | Unspecified cerebral artery occlusion with cerebral infarction                                                          |
|                        | ICD-10-CM | I63                                                     | Cerebral infarction                                                                                                     |
|                        | ICD-10-CM | I63.0                                                   | Cerebral infarction due to thrombosis of precerebral arteries                                                           |
|                        | ICD-10-CM | I63.00                                                  | Cerebral infarction due to thrombosis of unspecified precerebral artery                                                 |
|                        | ICD-10-CM | I63.01                                                  | Cerebral infarction due to thrombosis of vertebral artery                                                               |
|                        | ICD-10-CM | I63.011                                                 | Cerebral infarction due to thrombosis of right vertebral artery                                                         |
|                        | ICD-10-CM | I63.012                                                 | Cerebral infarction due to thrombosis of left vertebral artery                                                          |
|                        | ICD-10-CM | I63.013                                                 | Cerebral infarction due to thrombosis of bilateral vertebral arteries                                                   |
|                        | ICD-10-CM | I63.019                                                 | Cerebral infarction due to thrombosis of unspecified vertebral artery                                                   |
| ICD-10-CM              | I63.02    | Cerebral infarction due to thrombosis of basilar artery |                                                                                                                         |

|           |         |                                                                                                  |
|-----------|---------|--------------------------------------------------------------------------------------------------|
| ICD-10-CM | I63.03  | Cerebral infarction due to thrombosis of carotid artery                                          |
| ICD-10-CM | I63.031 | Cerebral infarction due to thrombosis of right carotid artery                                    |
| ICD-10-CM | I63.032 | Cerebral infarction due to thrombosis of left carotid artery                                     |
| ICD-10-CM | I63.033 | Cerebral infarction due to thrombosis of bilateral carotid arteries                              |
| ICD-10-CM | I63.039 | Cerebral infarction due to thrombosis of unspecified carotid artery                              |
| ICD-10-CM | I63.09  | Cerebral infarction due to thrombosis of precerebral artery                                      |
| ICD-10-CM | I63.1   | Cerebral infarction due to embolism of precerebral arteries                                      |
| ICD-10-CM | I63.10  | Cerebral infarction due to embolism of unspecified precerebral artery                            |
| ICD-10-CM | I63.11  | Cerebral infarction due to embolism of vertebral artery                                          |
| ICD-10-CM | I63.111 | Cerebral infarction due to embolism of right vertebral artery                                    |
| ICD-10-CM | I63.112 | Cerebral infarction due to embolism of left vertebral artery                                     |
| ICD-10-CM | I63.113 | Cerebral infarction due to embolism of bilateral vertebral arteries                              |
| ICD-10-CM | I63.119 | Cerebral infarction due to embolism of unspecified vertebral artery                              |
| ICD-10-CM | I63.12  | Cerebral infarction due to embolism of basilar artery                                            |
| ICD-10-CM | I63.13  | Cerebral infarction due to embolism of carotid artery                                            |
| ICD-10-CM | I63.131 | Cerebral infarction due to embolism of right carotid artery                                      |
| ICD-10-CM | I63.132 | Cerebral infarction due to embolism of left carotid artery                                       |
| ICD-10-CM | I63.133 | Cerebral infarction due to embolism of bilateral carotid arteries                                |
| ICD-10-CM | I63.139 | Cerebral infarction due to embolism of unspecified carotid artery                                |
| ICD-10-CM | I63.19  | Cerebral infarction due to embolism of precerebral artery                                        |
| ICD-10-CM | I63.2   | Cerebral infrc due to unsp occls or stenosis of precerb art                                      |
| ICD-10-CM | I63.20  | Cerebral infarction due to unspecified occlusion or stenosis of unspecified precerebral arteries |
| ICD-10-CM | I63.21  | Cerebral infrc due to unsp occls or stenosis of verteb art                                       |
| ICD-10-CM | I63.211 | Cerebral infarction due to unspecified occlusion or stenosis of right vertebral artery           |
| ICD-10-CM | I63.212 | Cerebral infarction due to unspecified occlusion or stenosis of left vertebral artery            |
| ICD-10-CM | I63.213 | Cerebral infarction due to unspecified occlusion or stenosis of bilateral vertebral arteries     |
| ICD-10-CM | I63.219 | Cerebral infarction due to unspecified occlusion or stenosis of unspecified vertebral arteries   |
| ICD-10-CM | I63.22  | Cerebral infarction due to unspecified occlusion or stenosis of basilar artery                   |
| ICD-10-CM | I63.23  | Cerebral infrc due to unsp occls or stenosis of carotid art                                      |
| ICD-10-CM | I63.231 | Cerebral infarction due to unspecified occlusion or stenosis of right carotid arteries           |
| ICD-10-CM | I63.232 | Cerebral infarction due to unspecified occlusion or stenosis of left carotid arteries            |
| ICD-10-CM | I63.233 | Cerebral infarction due to unspecified occlusion or stenosis of bilateral carotid arteries       |
| ICD-10-CM | I63.239 | Cerebral infarction due to unspecified occlusion or stenosis of unspecified carotid arteries     |
| ICD-10-CM | I63.29  | Cerebral infarction due to unspecified occlusion or stenosis of other precerebral arteries       |
| ICD-10-CM | I63.3   | Cerebral infarction due to thrombosis of cerebral arteries                                       |

|           |         |                                                                                |
|-----------|---------|--------------------------------------------------------------------------------|
| ICD-10-CM | I63.30  | Cerebral infarction due to thrombosis of unspecified cerebral artery           |
| ICD-10-CM | I63.31  | Cerebral infrc due to thrombosis of middle cerebral artery                     |
| ICD-10-CM | I63.311 | Cerebral infarction due to thrombosis of right middle cerebral artery          |
| ICD-10-CM | I63.312 | Cerebral infarction due to thrombosis of left middle cerebral artery           |
| ICD-10-CM | I63.313 | Cerebral infarction due to thrombosis of bilateral middle cerebral arteries    |
| ICD-10-CM | I63.319 | Cerebral infarction due to thrombosis of unspecified middle cerebral artery    |
| ICD-10-CM | I63.32  | Cerebral infrc due to thrombosis of anterior cerebral artery                   |
| ICD-10-CM | I63.321 | Cerebral infarction due to thrombosis of right anterior cerebral artery        |
| ICD-10-CM | I63.322 | Cerebral infarction due to thrombosis of left anterior cerebral artery         |
| ICD-10-CM | I63.323 | Cerebral infarction due to thrombosis of bilateral anterior cerebral arteries  |
| ICD-10-CM | I63.329 | Cerebral infarction due to thrombosis of unspecified anterior cerebral artery  |
| ICD-10-CM | I63.33  | Cerebral infrc due to thombos of posterior cerebral artery                     |
| ICD-10-CM | I63.331 | Cerebral infarction due to thrombosis of right posterior cerebral artery       |
| ICD-10-CM | I63.332 | Cerebral infarction due to thrombosis of left posterior cerebral artery        |
| ICD-10-CM | I63.333 | Cerebral infarction to thrombosis of bilateral posterior cerebral arteries     |
| ICD-10-CM | I63.339 | Cerebral infarction due to thrombosis of unspecified posterior cerebral artery |
| ICD-10-CM | I63.34  | Cerebral infarction due to thrombosis of cerebellar artery                     |
| ICD-10-CM | I63.341 | Cerebral infarction due to thrombosis of right cerebellar artery               |
| ICD-10-CM | I63.342 | Cerebral infarction due to thrombosis of left cerebellar artery                |
| ICD-10-CM | I63.343 | Cerebral infarction to thrombosis of bilateral cerebellar arteries             |
| ICD-10-CM | I63.349 | Cerebral infarction due to thrombosis of unspecified cerebellar artery         |
| ICD-10-CM | I63.39  | Cerebral infarction due to thrombosis of other cerebral artery                 |
| ICD-10-CM | I63.4   | Cerebral infarction due to embolism of cerebral arteries                       |
| ICD-10-CM | I63.40  | Cerebral infarction due to embolism of unspecified cerebral artery             |
| ICD-10-CM | I63.41  | Cerebral infrc due to embolism of middle cerebral artery                       |
| ICD-10-CM | I63.411 | Cerebral infarction due to embolism of right middle cerebral artery            |
| ICD-10-CM | I63.412 | Cerebral infarction due to embolism of left middle cerebral artery             |
| ICD-10-CM | I63.413 | Cerebral infarction due to embolism of bilateral middle cerebral arteries      |
| ICD-10-CM | I63.419 | Cerebral infarction due to embolism of unspecified middle cerebral artery      |
| ICD-10-CM | I63.42  | Cerebral infrc due to embolism of anterior cerebral artery                     |
| ICD-10-CM | I63.421 | Cerebral infarction due to embolism of right anterior cerebral artery          |

|           |         |                                                                                                       |
|-----------|---------|-------------------------------------------------------------------------------------------------------|
| ICD-10-CM | I63.422 | Cerebral infarction due to embolism of left anterior cerebral artery                                  |
| ICD-10-CM | I63.423 | Cerebral infarction due to embolism of bilateral anterior cerebral arteries                           |
| ICD-10-CM | I63.429 | Cerebral infarction due to embolism of unspecified anterior cerebral artery                           |
| ICD-10-CM | I63.43  | Cerebral infrc due to embolism of posterior cerebral artery                                           |
| ICD-10-CM | I63.431 | Cerebral infarction due to embolism of right posterior cerebral artery                                |
| ICD-10-CM | I63.432 | Cerebral infarction due to embolism of left posterior cerebral artery                                 |
| ICD-10-CM | I63.433 | Cerebral infarction due to embolism of bilateral posterior cerebral arteries                          |
| ICD-10-CM | I63.439 | Cerebral infarction due to embolism of unspecified posterior cerebral artery                          |
| ICD-10-CM | I63.44  | Cerebral infarction due to embolism of cerebellar artery                                              |
| ICD-10-CM | I63.441 | Cerebral infarction due to embolism of right cerebellar artery                                        |
| ICD-10-CM | I63.442 | Cerebral infarction due to embolism of left cerebellar artery                                         |
| ICD-10-CM | I63.443 | Cerebral infarction due to embolism of bilateral cerebellar arteries                                  |
| ICD-10-CM | I63.449 | Cerebral infarction due to embolism of unspecified cerebellar artery                                  |
| ICD-10-CM | I63.49  | Cerebral infarction due to embolism of other cerebral artery                                          |
| ICD-10-CM | I63.5   | Cerebral infrc due to unsp occls or stenosis of cerebral art                                          |
| ICD-10-CM | I63.50  | Cerebral infarction due to unspecified occlusion or stenosis of unspecified cerebral artery           |
| ICD-10-CM | I63.51  | Cereb infrc due to unsp occls or stenosis of middle cereb art                                         |
| ICD-10-CM | I63.511 | Cerebral infarction due to unspecified occlusion or stenosis of right middle cerebral artery          |
| ICD-10-CM | I63.512 | Cerebral infarction due to unspecified occlusion or stenosis of left middle cerebral artery           |
| ICD-10-CM | I63.513 | Cerebral infarction due to unspecified occlusion or stenosis of bilateral middle cerebral arteries    |
| ICD-10-CM | I63.519 | Cerebral infarction due to unspecified occlusion or stenosis of unspecified middle cerebral artery    |
| ICD-10-CM | I63.52  | Cereb infrc due to unsp occls or stenosis of ant cereb artery                                         |
| ICD-10-CM | I63.521 | Cerebral infarction due to unspecified occlusion or stenosis of right anterior cerebral artery        |
| ICD-10-CM | I63.522 | Cerebral infarction due to unspecified occlusion or stenosis of left anterior cerebral artery         |
| ICD-10-CM | I63.523 | Cerebral infarction due to unspecified occlusion or stenosis of bilateral anterior cerebral arteries  |
| ICD-10-CM | I63.529 | Cerebral infarction due to unspecified occlusion or stenosis of unspecified anterior cerebral artery  |
| ICD-10-CM | I63.53  | Cereb infrc due to unsp occls or stenosis of post cereb artery                                        |
| ICD-10-CM | I63.531 | Cerebral infarction due to unspecified occlusion or stenosis of right posterior cerebral artery       |
| ICD-10-CM | I63.532 | Cerebral infarction due to unspecified occlusion or stenosis of left posterior cerebral artery        |
| ICD-10-CM | I63.533 | Cerebral infarction due to unspecified occlusion or stenosis of bilateral posterior cerebral arteries |



|                                  |           |         |                                                                                                       |
|----------------------------------|-----------|---------|-------------------------------------------------------------------------------------------------------|
|                                  | ICD-10-CM | I63.539 | Cerebral infarction due to unspecified occlusion or stenosis of unspecified posterior cerebral artery |
|                                  | ICD-10-CM | I63.54  | Cerebr infrc due to unsp occls or stenosis of cereblr artery                                          |
|                                  | ICD-10-CM | I63.541 | Cerebral infarction due to unspecified occlusion or stenosis of right cerebellar artery               |
|                                  | ICD-10-CM | I63.542 | Cerebral infarction due to unspecified occlusion or stenosis of left cerebellar artery                |
|                                  | ICD-10-CM | I63.543 | Cerebral infarction due to unspecified occlusion or stenosis of bilateral cerebellar arteries         |
|                                  | ICD-10-CM | I63.549 | Cerebral infarction due to unspecified occlusion or stenosis of unspecified cerebellar artery         |
|                                  | ICD-10-CM | I63.59  | Cerebral infarction due to unspecified occlusion or stenosis of other cerebral artery                 |
|                                  | ICD-10-CM | I63.6   | Cerebral infarction due to cerebral venous thrombosis, nonpyogenic                                    |
|                                  | ICD-10-CM | I63.8   | Other cerebral infarction                                                                             |
|                                  | ICD-10-CM | I63.81  | Other cereb infrc due to occls or stenosis of small artery                                            |
|                                  | ICD-10-CM | I63.89  | Other cerebral infarction                                                                             |
|                                  | ICD-10-CM | I63.9   | Cerebral infarction, unspecified                                                                      |
| <b>Peripheral Artery Disease</b> | ICD-9-CM  | 440     | Atherosclerosis of aorta                                                                              |
|                                  | ICD-9-CM  | 440.2   | Atherosclerosis of native arteries of the extremities                                                 |
|                                  | ICD-9-CM  | 440.2   | Atherosclerosis of native arteries of the extremities, unspecified                                    |
|                                  | ICD-9-CM  | 440.21  | Atherosclerosis of native arteries of the extremities with intermittent claudication                  |
|                                  | ICD-9-CM  | 440.22  | Atherosclerosis of native arteries of the extremities with rest pain                                  |
|                                  | ICD-9-CM  | 440.23  | Atherosclerosis of native arteries of the extremities with ulceration                                 |
|                                  | ICD-9-CM  | 440.24  | Atherosclerosis of native arteries of the extremities with gangrene                                   |
|                                  | ICD-9-CM  | 440.29  | Atherosclerosis of native arteries of the extremities, others                                         |
|                                  | ICD-9-CM  | 440.3   | Atherosclerosis of bypass graft of the extremities                                                    |
|                                  | ICD-9-CM  | 440.3   | Atherosclerosis of unspecified bypass graft of the extremities                                        |
|                                  | ICD-9-CM  | 440.31  | Atherosclerosis of autologous vein bypass graft of the extremities                                    |
|                                  | ICD-9-CM  | 440.32  | Atherosclerosis of nonautologous biological bypass graft of the extremities                           |
|                                  | ICD-9-CM  | 440.4   | Chronic total occlusion of artery of the extremities                                                  |
|                                  | ICD-9-CM  | 440.8   | Of other specified arteries                                                                           |
|                                  | ICD-9-CM  | 440.9   | Generalized and unspecified atherosclerosis                                                           |
|                                  | ICD-9-CM  | 445     | Atheroembolism of extremities                                                                         |
|                                  | ICD-10-CM | I70.0   | Atherosclerosis of aorta                                                                              |
|                                  | ICD-10-CM | I70.1   | Atherosclerosis of renal artery                                                                       |
|                                  | ICD-10-CM | I70.201 | Unspecified atherosclerosis of native arteries of extremities, right leg                              |
|                                  | ICD-10-CM | I70.202 | Unspecified atherosclerosis of native arteries of extremities, left leg                               |
|                                  | ICD-10-CM | I70.203 | Unspecified atherosclerosis of native arteries of extremities, bilateral legs                         |
|                                  | ICD-10-CM | I70.208 | Unspecified atherosclerosis of native arteries of extremities, other extremity                        |

|           |         |                                                                                                         |
|-----------|---------|---------------------------------------------------------------------------------------------------------|
| ICD-10-CM | I70.209 | Unspecified atherosclerosis of native arteries of extremities, unspecified extremity                    |
| ICD-10-CM | I70.21  | Atherosclerosis of native arteries of extremities with intermittent claudication                        |
| ICD-10-CM | I70.211 | Atherosclerosis of native arteries of extremities with intermittent claudication, right leg             |
| ICD-10-CM | I70.212 | Atherosclerosis of native arteries of extremities with intermittent claudication, left leg              |
| ICD-10-CM | I70.213 | Atherosclerosis of native arteries of extremities with intermittent claudication, bilateral legs        |
| ICD-10-CM | I70.218 | Atherosclerosis of native arteries of extremities with intermittent claudication, other extremity       |
| ICD-10-CM | I70.219 | Atherosclerosis of native arteries of extremities with intermittent claudication, unspecified extremity |
| ICD-10-CM | I70.221 | Atherosclerosis of native arteries of extremities with rest pain, right leg                             |
| ICD-10-CM | I70.222 | Atherosclerosis of native arteries of extremities with rest pain, left leg                              |
| ICD-10-CM | I70.223 | Atherosclerosis of native arteries of extremities with rest pain, bilateral legs                        |
| ICD-10-CM | I70.228 | Atherosclerosis of native arteries of extremities with rest pain, other extremity                       |
| ICD-10-CM | I70.229 | Atherosclerosis of native arteries of extremities with rest pain, unspecified extremity                 |
| ICD-10-CM | I70.231 | Atherosclerosis of native arteries of right leg with ulceration of thigh                                |
| ICD-10-CM | I70.232 | Atherosclerosis of native arteries of right leg with ulceration of calf                                 |
| ICD-10-CM | I70.233 | Atherosclerosis of native arteries of right leg with ulceration of ankle                                |
| ICD-10-CM | I70.234 | Atherosclerosis of native arteries of right leg with ulceration of heel and midfoot                     |
| ICD-10-CM | I70.235 | Atherosclerosis of native arteries of right leg with ulceration of other part of foot                   |
| ICD-10-CM | I70.238 | Atherosclerosis of native arteries of right leg with ulceration of other part of lower right leg        |
| ICD-10-CM | I70.239 | Atherosclerosis of native arteries of right leg with ulceration of unspecified site                     |
| ICD-10-CM | I70.241 | Atherosclerosis of native arteries of left leg with ulceration of thigh                                 |
| ICD-10-CM | I70.242 | Atherosclerosis of native arteries of left leg with ulceration of calf                                  |
| ICD-10-CM | I70.243 | Atherosclerosis of native arteries of left leg with ulceration of ankle                                 |
| ICD-10-CM | I70.244 | Atherosclerosis of native arteries of left leg with ulceration of heel and midfoot                      |
| ICD-10-CM | I70.245 | Atherosclerosis of native arteries of left leg with ulceration of other part of foot                    |
| ICD-10-CM | I70.248 | Atherosclerosis of native arteries of left leg with ulceration of other part of lower left leg          |
| ICD-10-CM | I70.249 | Atherosclerosis of native arteries of left leg with ulceration of unspecified site                      |
| ICD-10-CM | I70.25  | Atherosclerosis of native arteries of other extremities with ulceration                                 |

|           |         |                                                                                                                                 |
|-----------|---------|---------------------------------------------------------------------------------------------------------------------------------|
| ICD-10-CM | I70.261 | Atherosclerosis of native arteries of extremities with gangrene, right leg                                                      |
| ICD-10-CM | I70.262 | Atherosclerosis of native arteries of extremities with gangrene, left leg                                                       |
| ICD-10-CM | I70.263 | Atherosclerosis of native arteries of extremities with gangrene, bilateral legs                                                 |
| ICD-10-CM | I70.268 | Atherosclerosis of native arteries of extremities with gangrene, other extremity                                                |
| ICD-10-CM | I70.269 | Atherosclerosis of native arteries of extremities with gangrene, unspecified extremity                                          |
| ICD-10-CM | I70.291 | Other atherosclerosis of native arteries of extremities, right leg                                                              |
| ICD-10-CM | I70.292 | Other atherosclerosis of native arteries of extremities, left leg                                                               |
| ICD-10-CM | I70.293 | Other atherosclerosis of native arteries of extremities, bilateral legs                                                         |
| ICD-10-CM | I70.298 | Other atherosclerosis of native arteries of extremities, other extremity                                                        |
| ICD-10-CM | I70.299 | Other atherosclerosis of native arteries of extremities, unspecified extremity                                                  |
| ICD-10-CM | I70.301 | Unspecified atherosclerosis of unspecified type of bypass graft(s) of the extremities, right leg                                |
| ICD-10-CM | I70.302 | Unspecified atherosclerosis of unspecified type of bypass graft(s) of the extremities, left leg                                 |
| ICD-10-CM | I70.303 | Unspecified atherosclerosis of unspecified type of bypass graft(s) of the extremities, bilateral legs                           |
| ICD-10-CM | I70.308 | Unspecified atherosclerosis of unspecified type of bypass graft(s) of the extremities, other extremity                          |
| ICD-10-CM | I70.309 | Unspecified atherosclerosis of unspecified type of bypass graft(s) of the extremities, unspecified extremity                    |
| ICD-10-CM | I70.31  | Atherosclerosis of unspecified type of bypass graft(s) of the extremities with intermittent claudication                        |
| ICD-10-CM | I70.311 | Atherosclerosis of unspecified type of bypass graft(s) of the extremities with intermittent claudication, right leg             |
| ICD-10-CM | I70.312 | Atherosclerosis of unspecified type of bypass graft(s) of the extremities with intermittent claudication, left leg              |
| ICD-10-CM | I70.313 | Atherosclerosis of unspecified type of bypass graft(s) of the extremities with intermittent claudication, bilateral legs        |
| ICD-10-CM | I70.318 | Atherosclerosis of unspecified type of bypass graft(s) of the extremities with intermittent claudication, other extremity       |
| ICD-10-CM | I70.319 | Atherosclerosis of unspecified type of bypass graft(s) of the extremities with intermittent claudication, unspecified extremity |
| ICD-10-CM | I70.321 | Atherosclerosis of unspecified type of bypass graft(s) of the extremities with rest pain, right leg                             |
| ICD-10-CM | I70.322 | Atherosclerosis of unspecified type of bypass graft(s) of the extremities with rest pain, left leg                              |
| ICD-10-CM | I70.323 | Atherosclerosis of unspecified type of bypass graft(s) of the extremities with rest pain, bilateral legs                        |
| ICD-10-CM | I70.328 | Atherosclerosis of unspecified type of bypass graft(s) of the extremities with rest pain, other extremity                       |
| ICD-10-CM | I70.329 | Atherosclerosis of unspecified type of bypass graft(s) of the extremities with rest pain, unspecified extremity                 |
| ICD-10-CM | I70.331 | Atherosclerosis of unspecified type of bypass graft(s) of the right leg with ulceration of thigh                                |
| ICD-10-CM | I70.332 | Atherosclerosis of unspecified type of bypass graft(s) of the right leg with ulceration of calf                                 |

|           |         |                                                                                                                    |
|-----------|---------|--------------------------------------------------------------------------------------------------------------------|
| ICD-10-CM | I70.333 | Atherosclerosis of unspecified type of bypass graft(s) of the right leg with ulceration of ankle                   |
| ICD-10-CM | I70.334 | Atherosclerosis of unspecified type of bypass graft(s) of the right leg with ulceration of heel and midfoot        |
| ICD-10-CM | I70.335 | Atherosclerosis of unspecified type of bypass graft(s) of the right leg with ulceration of other part of foot      |
| ICD-10-CM | I70.338 | Atherosclerosis of unspecified type of bypass graft(s) of the right leg with ulceration of other part of lower leg |
| ICD-10-CM | I70.339 | Atherosclerosis of unspecified type of bypass graft(s) of the right leg with ulceration of unspecified site        |
| ICD-10-CM | I70.341 | Atherosclerosis of unspecified type of bypass graft(s) of the left leg with ulceration of thigh                    |
| ICD-10-CM | I70.342 | Atherosclerosis of unspecified type of bypass graft(s) of the left leg with ulceration of calf                     |
| ICD-10-CM | I70.343 | Atherosclerosis of unspecified type of bypass graft(s) of the left leg with ulceration of ankle                    |
| ICD-10-CM | I70.344 | Atherosclerosis of unspecified type of bypass graft(s) of the left leg with ulceration of heel and midfoot         |
| ICD-10-CM | I70.345 | Atherosclerosis of unspecified type of bypass graft(s) of the left leg with ulceration of other part of foot       |
| ICD-10-CM | I70.348 | Atherosclerosis of unspecified type of bypass graft(s) of the left leg with ulceration of other part of lower leg  |
| ICD-10-CM | I70.349 | Atherosclerosis of unspecified type of bypass graft(s) of the left leg with ulceration of unspecified site         |
| ICD-10-CM | I70.35  | Atherosclerosis, unspecified type of bypass graft of other extremity, with ulceration                              |
| ICD-10-CM | I70.361 | Atherosclerosis of unspecified type of bypass graft(s) of the extremities with gangrene, right leg                 |
| ICD-10-CM | I70.362 | Atherosclerosis of unspecified type of bypass graft(s) of the extremities with gangrene, left leg                  |
| ICD-10-CM | I70.363 | Atherosclerosis of unspecified type of bypass graft(s) of the extremities with gangrene, bilateral legs            |
| ICD-10-CM | I70.368 | Atherosclerosis of unspecified type of bypass graft(s) of the extremities with gangrene, other extremity           |
| ICD-10-CM | I70.369 | Atherosclerosis of unspecified type of bypass graft(s) of the extremities with gangrene, unspecified extremity     |
| ICD-10-CM | I70.391 | Other atherosclerosis of unspecified type of bypass graft(s) of the extremities, right leg                         |
| ICD-10-CM | I70.392 | Other atherosclerosis of unspecified type of bypass graft(s) of the extremities, left leg                          |
| ICD-10-CM | I70.393 | Other atherosclerosis of unspecified type of bypass graft(s) of the extremities, bilateral legs                    |
| ICD-10-CM | I70.398 | Other atherosclerosis of unspecified type of bypass graft(s) of the extremities, other extremity                   |
| ICD-10-CM | I70.399 | Other atherosclerosis of unspecified type of bypass graft(s) of the extremities, unspecified extremity             |
| ICD-10-CM | I70.401 | Unspecified atherosclerosis of autologous vein bypass graft(s) of the extremities, right leg                       |
| ICD-10-CM | I70.402 | Unspecified atherosclerosis of autologous vein bypass graft(s) of the extremities, left leg                        |
| ICD-10-CM | I70.403 | Unspecified atherosclerosis of autologous vein bypass graft(s) of the extremities, bilateral legs                  |
| ICD-10-CM | I70.408 | Unspecified atherosclerosis of autologous vein bypass graft(s) of the extremities, other extremity                 |

|           |         |                                                                                                                             |
|-----------|---------|-----------------------------------------------------------------------------------------------------------------------------|
| ICD-10-CM | I70.409 | Unspecified atherosclerosis of autologous vein bypass graft(s) of the extremities, unspecified extremity                    |
| ICD-10-CM | I70.41  | Atherosclerosis of autologous vein bypass graft(s) of the extremities with intermittent claudication                        |
| ICD-10-CM | I70.411 | Atherosclerosis of autologous vein bypass graft(s) of the extremities with intermittent claudication, right leg             |
| ICD-10-CM | I70.412 | Atherosclerosis of autologous vein bypass graft(s) of the extremities with intermittent claudication, left leg              |
| ICD-10-CM | I70.413 | Atherosclerosis of autologous vein bypass graft(s) of the extremities with intermittent claudication, bilateral legs        |
| ICD-10-CM | I70.418 | Atherosclerosis of autologous vein bypass graft(s) of the extremities with intermittent claudication, other extremity       |
| ICD-10-CM | I70.419 | Atherosclerosis of autologous vein bypass graft(s) of the extremities with intermittent claudication, unspecified extremity |
| ICD-10-CM | I70.421 | Atherosclerosis of autologous vein bypass graft(s) of the extremities with rest pain, right leg                             |
| ICD-10-CM | I70.422 | Atherosclerosis of autologous vein bypass graft(s) of the extremities with rest pain, left leg                              |
| ICD-10-CM | I70.423 | Atherosclerosis of autologous vein bypass graft(s) of the extremities with rest pain, bilateral legs                        |
| ICD-10-CM | I70.428 | Atherosclerosis of autologous vein bypass graft(s) of the extremities with rest pain, other extremity                       |
| ICD-10-CM | I70.429 | Atherosclerosis of autologous vein bypass graft(s) of the extremities with rest pain, unspecified extremity                 |
| ICD-10-CM | I70.431 | Atherosclerosis of autologous vein bypass graft(s) of the right leg with ulceration of thigh                                |
| ICD-10-CM | I70.432 | Atherosclerosis of autologous vein bypass graft(s) of the right leg with ulceration of calf                                 |
| ICD-10-CM | I70.433 | Atherosclerosis of autologous vein bypass graft(s) of the right leg with ulceration of ankle                                |
| ICD-10-CM | I70.434 | Atherosclerosis of autologous vein bypass graft(s) of the right leg with ulceration of heel and midfoot                     |
| ICD-10-CM | I70.435 | Atherosclerosis of autologous vein bypass graft(s) of the right leg with ulceration of other part of foot                   |
| ICD-10-CM | I70.438 | Atherosclerosis of autologous vein bypass graft(s) of the right leg with ulceration of other part of lower leg              |
| ICD-10-CM | I70.439 | Atherosclerosis of autologous vein bypass graft(s) of the right leg with ulceration of unspecified site                     |
| ICD-10-CM | I70.441 | Atherosclerosis of autologous vein bypass graft(s) of the left leg with ulceration of thigh                                 |
| ICD-10-CM | I70.442 | Atherosclerosis of autologous vein bypass graft(s) of the left leg with ulceration of calf                                  |
| ICD-10-CM | I70.443 | Atherosclerosis of autologous vein bypass graft(s) of the left leg with ulceration of ankle                                 |
| ICD-10-CM | I70.444 | Atherosclerosis of autologous vein bypass graft(s) of the left leg with ulceration of heel and midfoot                      |
| ICD-10-CM | I70.445 | Atherosclerosis of autologous vein bypass graft(s) of the left leg with ulceration of other part of foot                    |
| ICD-10-CM | I70.448 | Atherosclerosis of autologous vein bypass graft(s) of the left leg with ulceration of other part of lower leg               |
| ICD-10-CM | I70.449 | Atherosclerosis of autologous vein bypass graft(s) of the left leg with ulceration of unspecified site                      |
| ICD-10-CM | I70.45  | Atherosclerosis of autologous vein bypass graft(s) of other extremity with ulceration                                       |

|           |         |                                                                                                                                      |
|-----------|---------|--------------------------------------------------------------------------------------------------------------------------------------|
| ICD-10-CM | I70.461 | Atherosclerosis of autologous vein bypass graft(s) of the extremities with gangrene, right leg                                       |
| ICD-10-CM | I70.462 | Atherosclerosis of autologous vein bypass graft(s) of the extremities with gangrene, left leg                                        |
| ICD-10-CM | I70.463 | Atherosclerosis of autologous vein bypass graft(s) of the extremities with gangrene, bilateral legs                                  |
| ICD-10-CM | I70.468 | Atherosclerosis of autologous vein bypass graft(s) of the extremities with gangrene, other extremity                                 |
| ICD-10-CM | I70.469 | Atherosclerosis of autologous vein bypass graft(s) of the extremities with gangrene, unspecified extremity                           |
| ICD-10-CM | I70.491 | Other atherosclerosis of autologous vein bypass graft(s) of the extremities, right leg                                               |
| ICD-10-CM | I70.492 | Other atherosclerosis of autologous vein bypass graft(s) of the extremities, left leg                                                |
| ICD-10-CM | I70.493 | Other atherosclerosis of autologous vein bypass graft(s) of the extremities, bilateral legs                                          |
| ICD-10-CM | I70.498 | Other atherosclerosis of autologous vein bypass graft(s) of the extremities, other extremity                                         |
| ICD-10-CM | I70.499 | Other atherosclerosis of autologous vein bypass graft(s) of the extremities, unspecified extremity                                   |
| ICD-10-CM | I70.501 | Unspecified atherosclerosis of nonautologous biological bypass graft(s) of the extremities, right leg                                |
| ICD-10-CM | I70.502 | Unspecified atherosclerosis of nonautologous biological bypass graft(s) of the extremities, left leg                                 |
| ICD-10-CM | I70.503 | Unspecified atherosclerosis of nonautologous biological bypass graft(s) of the extremities, bilateral legs                           |
| ICD-10-CM | I70.508 | Unspecified atherosclerosis of nonautologous biological bypass graft(s) of the extremities, other extremity                          |
| ICD-10-CM | I70.509 | Unspecified atherosclerosis of nonautologous biological bypass graft(s) of the extremities, unspecified extremity                    |
| ICD-10-CM | I70.51  | Atherosclerosis of nonautologous biological bypass graft(s) of the extremities intermittent claudication                             |
| ICD-10-CM | I70.511 | Atherosclerosis of nonautologous biological bypass graft(s) of the extremities with intermittent claudication, right leg             |
| ICD-10-CM | I70.512 | Atherosclerosis of nonautologous biological bypass graft(s) of the extremities with intermittent claudication, left leg              |
| ICD-10-CM | I70.513 | Atherosclerosis of nonautologous biological bypass graft(s) of the extremities with intermittent claudication, bilateral legs        |
| ICD-10-CM | I70.518 | Atherosclerosis of nonautologous biological bypass graft(s) of the extremities with intermittent claudication, other extremity       |
| ICD-10-CM | I70.519 | Atherosclerosis of nonautologous biological bypass graft(s) of the extremities with intermittent claudication, unspecified extremity |
| ICD-10-CM | I70.521 | Atherosclerosis of nonautologous biological bypass graft(s) of the extremities with rest pain, right leg                             |
| ICD-10-CM | I70.522 | Atherosclerosis of nonautologous biological bypass graft(s) of the extremities with rest pain, left leg                              |
| ICD-10-CM | I70.523 | Atherosclerosis of nonautologous biological bypass graft(s) of the extremities with rest pain, bilateral legs                        |
| ICD-10-CM | I70.528 | Atherosclerosis of nonautologous biological bypass graft(s) of the extremities with rest pain, other extremity                       |
| ICD-10-CM | I70.529 | Atherosclerosis of nonautologous biological bypass graft(s) of the extremities with rest pain, unspecified extremity                 |
| ICD-10-CM | I70.531 | Atherosclerosis of nonautologous biological bypass graft(s) of the right leg with ulceration of thigh                                |

|           |         |                                                                                                                         |
|-----------|---------|-------------------------------------------------------------------------------------------------------------------------|
| ICD-10-CM | I70.532 | Atherosclerosis of nonautologous biological bypass graft(s) of the right leg with ulceration of calf                    |
| ICD-10-CM | I70.533 | Atherosclerosis of nonautologous biological bypass graft(s) of the right leg with ulceration of ankle                   |
| ICD-10-CM | I70.534 | Atherosclerosis of nonautologous biological bypass graft(s) of the right leg with ulceration of heel and midfoot        |
| ICD-10-CM | I70.535 | Atherosclerosis of nonautologous biological bypass graft(s) of the right leg with ulceration of other part of foot      |
| ICD-10-CM | I70.538 | Atherosclerosis of nonautologous biological bypass graft(s) of the right leg with ulceration of other part of lower leg |
| ICD-10-CM | I70.539 | Atherosclerosis of nonautologous biological bypass graft(s) of the right leg with ulceration of unspecified site        |
| ICD-10-CM | I70.541 | Atherosclerosis of nonautologous biological bypass graft(s) of the left leg with ulceration of thigh                    |
| ICD-10-CM | I70.542 | Atherosclerosis of nonautologous biological bypass graft(s) of the left leg with ulceration of calf                     |
| ICD-10-CM | I70.543 | Atherosclerosis of nonautologous biological bypass graft(s) of the left leg with ulceration of ankle                    |
| ICD-10-CM | I70.544 | Atherosclerosis of nonautologous biological bypass graft(s) of the left leg with ulceration of heel and midfoot         |
| ICD-10-CM | I70.545 | Atherosclerosis of nonautologous biological bypass graft(s) of the left leg with ulceration of other part of foot       |
| ICD-10-CM | I70.548 | Atherosclerosis of nonautologous biological bypass graft(s) of the left leg with ulceration of other part of lower leg  |
| ICD-10-CM | I70.549 | Atherosclerosis of nonautologous biological bypass graft(s) of the left leg with ulceration of unspecified site         |
| ICD-10-CM | I70.55  | Atherosclerosis of nonautologous biological bypass graft(s) of other extremity with ulceration                          |
| ICD-10-CM | I70.561 | Atherosclerosis of nonautologous biological bypass graft(s) of the extremities with gangrene, right leg                 |
| ICD-10-CM | I70.562 | Atherosclerosis of nonautologous biological bypass graft(s) of the extremities with gangrene, left leg                  |
| ICD-10-CM | I70.563 | Atherosclerosis of nonautologous biological bypass graft(s) of the extremities with gangrene, bilateral legs            |
| ICD-10-CM | I70.568 | Atherosclerosis of nonautologous biological bypass graft(s) of the extremities with gangrene, other extremity           |
| ICD-10-CM | I70.569 | Atherosclerosis of nonautologous biological bypass graft(s) of the extremities with gangrene, unspecified extremity     |
| ICD-10-CM | I70.591 | Other atherosclerosis of nonautologous biological bypass graft(s) of the extremities, right leg                         |
| ICD-10-CM | I70.592 | Other atherosclerosis of nonautologous biological bypass graft(s) of the extremities, left leg                          |
| ICD-10-CM | I70.593 | Other atherosclerosis of nonautologous biological bypass graft(s) of the extremities, bilateral legs                    |
| ICD-10-CM | I70.598 | Other atherosclerosis of nonautologous biological bypass graft(s) of the extremities, other extremity                   |
| ICD-10-CM | I70.599 | Other atherosclerosis of nonautologous biological bypass graft(s) of the extremities, unspecified extremity             |
| ICD-10-CM | I70.601 | Unspecified atherosclerosis of nonbiological bypass graft(s) of the extremities, right leg                              |
| ICD-10-CM | I70.602 | Unspecified atherosclerosis of nonbiological bypass graft(s) of the extremities, left leg                               |
| ICD-10-CM | I70.603 | Unspecified atherosclerosis of nonbiological bypass graft(s) of the extremities, bilateral legs                         |

|           |         |                                                                                                                           |
|-----------|---------|---------------------------------------------------------------------------------------------------------------------------|
| ICD-10-CM | I70.608 | Unspecified atherosclerosis of nonbiological bypass graft(s) of the extremities, other extremity                          |
| ICD-10-CM | I70.609 | Unspecified atherosclerosis of nonbiological bypass graft(s) of the extremities, unspecified extremity                    |
| ICD-10-CM | I70.61  | Atherosclerosis of nonbiological bypass graft(s) of the extremities with intermittent claudication                        |
| ICD-10-CM | I70.611 | Atherosclerosis of nonbiological bypass graft(s) of the extremities with intermittent claudication, right leg             |
| ICD-10-CM | I70.612 | Atherosclerosis of nonbiological bypass graft(s) of the extremities with intermittent claudication, left leg              |
| ICD-10-CM | I70.613 | Atherosclerosis of nonbiological bypass graft(s) of the extremities with intermittent claudication, bilateral legs        |
| ICD-10-CM | I70.618 | Atherosclerosis of nonbiological bypass graft(s) of the extremities with intermittent claudication, other extremity       |
| ICD-10-CM | I70.619 | Atherosclerosis of nonbiological bypass graft(s) of the extremities with intermittent claudication, unspecified extremity |
| ICD-10-CM | I70.621 | Atherosclerosis of nonbiological bypass graft(s) of the extremities with rest pain, right leg                             |
| ICD-10-CM | I70.622 | Atherosclerosis of nonbiological bypass graft(s) of the extremities with rest pain, left leg                              |
| ICD-10-CM | I70.623 | Atherosclerosis of nonbiological bypass graft(s) of the extremities with rest pain, bilateral legs                        |
| ICD-10-CM | I70.628 | Atherosclerosis of nonbiological bypass graft(s) of the extremities with rest pain, other extremity                       |
| ICD-10-CM | I70.629 | Atherosclerosis of nonbiological bypass graft(s) of the extremities with rest pain, unspecified extremity                 |
| ICD-10-CM | I70.631 | Atherosclerosis of nonbiological bypass graft(s) of the right leg with ulceration of thigh                                |
| ICD-10-CM | I70.632 | Atherosclerosis of nonbiological bypass graft(s) of the right leg with ulceration of calf                                 |
| ICD-10-CM | I70.633 | Atherosclerosis of nonbiological bypass graft(s) of the right leg with ulceration of ankle                                |
| ICD-10-CM | I70.634 | Atherosclerosis of nonbiological bypass graft(s) of the right leg with ulceration of heel and midfoot                     |
| ICD-10-CM | I70.635 | Atherosclerosis of nonbiological bypass graft(s) of the right leg with ulceration of other part of foot                   |
| ICD-10-CM | I70.638 | Atherosclerosis of nonbiological bypass graft(s) of the right leg with ulceration of other part of lower leg              |
| ICD-10-CM | I70.639 | Atherosclerosis of nonbiological bypass graft(s) of the right leg with ulceration of unspecified site                     |
| ICD-10-CM | I70.641 | Atherosclerosis of nonbiological bypass graft(s) of the left leg with ulceration of thigh                                 |
| ICD-10-CM | I70.642 | Atherosclerosis of nonbiological bypass graft(s) of the left leg with ulceration of calf                                  |
| ICD-10-CM | I70.643 | Atherosclerosis of nonbiological bypass graft(s) of the left leg with ulceration of ankle                                 |
| ICD-10-CM | I70.644 | Atherosclerosis of nonbiological bypass graft(s) of the left leg with ulceration of heel and midfoot                      |
| ICD-10-CM | I70.645 | Atherosclerosis of nonbiological bypass graft(s) of the left leg with ulceration of other part of foot                    |
| ICD-10-CM | I70.648 | Atherosclerosis of nonbiological bypass graft(s) of the left leg with ulceration of other part of lower leg               |
| ICD-10-CM | I70.649 | Atherosclerosis of nonbiological bypass graft(s) of the left leg with ulceration of unspecified site                      |



|           |         |                                                                                                                           |
|-----------|---------|---------------------------------------------------------------------------------------------------------------------------|
| ICD-10-CM | I70.65  | Atherosclerosis of nonbiological bypass graft(s) of other extremity with ulceration                                       |
| ICD-10-CM | I70.661 | Atherosclerosis of nonbiological bypass graft(s) of the extremities with gangrene, right leg                              |
| ICD-10-CM | I70.662 | Atherosclerosis of nonbiological bypass graft(s) of the extremities with gangrene, left leg                               |
| ICD-10-CM | I70.663 | Atherosclerosis of nonbiological bypass graft(s) of the extremities with gangrene, bilateral legs                         |
| ICD-10-CM | I70.668 | Atherosclerosis of nonbiological bypass graft(s) of the extremities with gangrene, other extremity                        |
| ICD-10-CM | I70.669 | Atherosclerosis of nonbiological bypass graft(s) of the extremities with gangrene, unspecified extremity                  |
| ICD-10-CM | I70.691 | Other atherosclerosis of nonbiological bypass graft(s) of the extremities, right leg                                      |
| ICD-10-CM | I70.692 | Other atherosclerosis of nonbiological bypass graft(s) of the extremities, left leg                                       |
| ICD-10-CM | I70.693 | Other atherosclerosis of nonbiological bypass graft(s) of the extremities, bilateral legs                                 |
| ICD-10-CM | I70.698 | Other atherosclerosis of nonbiological bypass graft(s) of the extremities, other extremity                                |
| ICD-10-CM | I70.699 | Other atherosclerosis of nonbiological bypass graft(s) of the extremities, unspecified extremity                          |
| ICD-10-CM | I70.701 | Unspecified atherosclerosis of other type of bypass graft(s) of the extremities, right leg                                |
| ICD-10-CM | I70.702 | Unspecified atherosclerosis of other type of bypass graft(s) of the extremities, left leg                                 |
| ICD-10-CM | I70.703 | Unspecified atherosclerosis of other type of bypass graft(s) of the extremities, bilateral legs                           |
| ICD-10-CM | I70.708 | Unspecified atherosclerosis of other type of bypass graft(s) of the extremities, other extremity                          |
| ICD-10-CM | I70.709 | Unspecified atherosclerosis of other type of bypass graft(s) of the extremities, unspecified extremity                    |
| ICD-10-CM | I70.71  | Atherosclerosis of other type of bypass graft(s) of the extremities with intermittent claudication                        |
| ICD-10-CM | I70.711 | Atherosclerosis of other type of bypass graft(s) of the extremities with intermittent claudication, right leg             |
| ICD-10-CM | I70.712 | Atherosclerosis of other type of bypass graft(s) of the extremities with intermittent claudication, left leg              |
| ICD-10-CM | I70.713 | Atherosclerosis of other type of bypass graft(s) of the extremities with intermittent claudication, bilateral legs        |
| ICD-10-CM | I70.718 | Atherosclerosis of other type of bypass graft(s) of the extremities with intermittent claudication, other extremity       |
| ICD-10-CM | I70.719 | Atherosclerosis of other type of bypass graft(s) of the extremities with intermittent claudication, unspecified extremity |
| ICD-10-CM | I70.721 | Atherosclerosis of other type of bypass graft(s) of the extremities with rest pain, right leg                             |
| ICD-10-CM | I70.722 | Atherosclerosis of other type of bypass graft(s) of the extremities with rest pain, left leg                              |
| ICD-10-CM | I70.723 | Atherosclerosis of other type of bypass graft(s) of the extremities with rest pain, bilateral legs                        |
| ICD-10-CM | I70.728 | Atherosclerosis of other type of bypass graft(s) of the extremities with rest pain, other extremity                       |
| ICD-10-CM | I70.729 | Atherosclerosis of other type of bypass graft(s) of the extremities with rest pain, unspecified extremity                 |

|           |         |                                                                                                              |
|-----------|---------|--------------------------------------------------------------------------------------------------------------|
| ICD-10-CM | I70.731 | Atherosclerosis of other type of bypass graft(s) of the right leg with ulceration of thigh                   |
| ICD-10-CM | I70.732 | Atherosclerosis of other type of bypass graft(s) of the right leg with ulceration of calf                    |
| ICD-10-CM | I70.733 | Atherosclerosis of other type of bypass graft(s) of the right leg with ulceration of ankle                   |
| ICD-10-CM | I70.734 | Atherosclerosis of other type of bypass graft(s) of the right leg with ulceration of heel and midfoot        |
| ICD-10-CM | I70.735 | Atherosclerosis of other type of bypass graft(s) of the right leg with ulceration of other part of foot      |
| ICD-10-CM | I70.738 | Atherosclerosis of other type of bypass graft(s) of the right leg with ulceration of other part of lower leg |
| ICD-10-CM | I70.739 | Atherosclerosis of other type of bypass graft(s) of the right leg with ulceration of unspecified site        |
| ICD-10-CM | I70.741 | Atherosclerosis of other type of bypass graft(s) of the left leg with ulceration of thigh                    |
| ICD-10-CM | I70.742 | Atherosclerosis of other type of bypass graft(s) of the left leg with ulceration of calf                     |
| ICD-10-CM | I70.743 | Atherosclerosis of other type of bypass graft(s) of the left leg with ulceration of ankle                    |
| ICD-10-CM | I70.744 | Atherosclerosis of other type of bypass graft(s) of the left leg with ulceration of heel and midfoot         |
| ICD-10-CM | I70.745 | Atherosclerosis of other type of bypass graft(s) of the left leg with ulceration of other part of foot       |
| ICD-10-CM | I70.748 | Atherosclerosis of other type of bypass graft(s) of the left leg with ulceration of other part of lower leg  |
| ICD-10-CM | I70.749 | Atherosclerosis of other type of bypass graft(s) of the left leg with ulceration of unspecified site         |
| ICD-10-CM | I70.75  | Atherosclerosis of other type of bypass graft(s) of other extremity with ulceration                          |
| ICD-10-CM | I70.761 | Atherosclerosis of other type of bypass graft(s) of the extremities with gangrene, right leg                 |
| ICD-10-CM | I70.762 | Atherosclerosis of other type of bypass graft(s) of the extremities with gangrene, left leg                  |
| ICD-10-CM | I70.763 | Atherosclerosis of other type of bypass graft(s) of the extremities with gangrene, bilateral legs            |
| ICD-10-CM | I70.768 | Atherosclerosis of other type of bypass graft(s) of the extremities with gangrene, other extremity           |
| ICD-10-CM | I70.769 | Atherosclerosis of other type of bypass graft(s) of the extremities with gangrene, unspecified extremity     |
| ICD-10-CM | I70.791 | Other atherosclerosis of other type of bypass graft(s) of the extremities, right leg                         |
| ICD-10-CM | I70.792 | Other atherosclerosis of other type of bypass graft(s) of the extremities, left leg                          |
| ICD-10-CM | I70.793 | Other atherosclerosis of other type of bypass graft(s) of the extremities, bilateral legs                    |
| ICD-10-CM | I70.798 | Other atherosclerosis of other type of bypass graft(s) of the extremities, other extremity                   |
| ICD-10-CM | I70.799 | Other atherosclerosis of other type of bypass graft(s) of the extremities, unspecified extremity             |
| ICD-10-CM | I70.8   | Atherosclerosis of other arteries                                                                            |
| ICD-10-CM | I70.90  | Unspecified atherosclerosis                                                                                  |
| ICD-10-CM | I70.91  | Generalized atherosclerosis                                                                                  |

|                        |           |         |                                                                                                                     |
|------------------------|-----------|---------|---------------------------------------------------------------------------------------------------------------------|
|                        | ICD-10-CM | I70.92  | Chronic total occlusion of artery of extremities                                                                    |
| <b>Unstable Angina</b> | ICD-9-CM  | 411.1   | Intermediate coronary syndrome: Impending infarction, Preinfarction angina, Preinfarction syndrome, Unstable angina |
|                        | ICD-10-CM | I20.0   | Unstable angina                                                                                                     |
|                        | ICD-10-CM | I25.110 | Atherosclerotic heart disease of native coronary artery with unstable angina pectoris                               |
|                        | ICD-10-CM | I25.700 | Atherosclerosis of coronary artery bypass graft(s), unspecified, with unstable angina pectoris                      |
|                        | ICD-10-CM | I25.710 | Atherosclerosis of autologous vein coronary artery bypass graft(s) with unstable angina pectoris                    |
|                        | ICD-10-CM | I25.720 | Atherosclerosis of autologous artery coronary artery bypass graft(s) with unstable angina pectoris                  |
|                        | ICD-10-CM | I25.730 | Atherosclerosis of nonautologous biological coronary artery bypass graft(s) with unstable angina pectoris           |
|                        | ICD-10-CM | I25.750 | Atherosclerosis of native coronary artery of transplanted heart with unstable angina                                |
|                        | ICD-10-CM | I25.760 | Atherosclerosis of bypass graft of coronary artery of transplanted heart with unstable angina                       |
|                        | ICD-10-CM | I25.790 | Atherosclerosis of other coronary artery bypass graft(s) with unstable angina pectoris                              |
| <b>Stable Angina</b>   | ICD-9-CM  | 413     | Angina pectoris                                                                                                     |
|                        | ICD-9-CM  | 413.0   | Angina decubitus                                                                                                    |
|                        | ICD-9-CM  | 413.9   | Other and unspecified angina pectoris                                                                               |
|                        | ICD-10-CM | I20     | Angina pectoris                                                                                                     |
|                        | ICD-10-CM | I20.8   | Other forms of angina pectoris                                                                                      |
|                        | ICD-10-CM | I20.9   | Angina pectoris, unspecified                                                                                        |
|                        | ICD-10-CM | I25.11  | Atherosclerotic heart disease of native coronary artery with angina pectoris                                        |
|                        | ICD-10-CM | I25.111 | Atherosclerotic heart disease of native coronary artery with angina pectoris with documented spasm                  |
|                        | ICD-10-CM | I25.118 | Atherosclerotic heart disease of native coronary artery with other forms of angina pectoris                         |
|                        | ICD-10-CM | I25.119 | Atherosclerotic heart disease of native coronary artery with unspecified angina pectoris                            |
|                        | ICD-10-CM | I25.7   | Atherosclerosis of coronary artery bypass graft(s) and coronary artery of transplanted heart with angina pectoris   |
|                        | ICD-10-CM | I25.70  | Atherosclerosis of coronary artery bypass graft(s), unspecified, with angina pectoris                               |
|                        | ICD-10-CM | I25.701 | Atherosclerosis of coronary artery bypass graft(s), unspecified, with angina pectoris with documented spasm         |
|                        | ICD-10-CM | I25.708 | Atherosclerosis of coronary artery bypass graft(s), unspecified, with other forms of angina pectoris                |
|                        | ICD-10-CM | I25.709 | Atherosclerosis of coronary artery bypass graft(s), unspecified, with unspecified angina pectoris                   |
|                        | ICD-10-CM | I25.71  | Atherosclerosis of autologous vein coronary artery bypass graft(s) with angina pectoris                             |
|                        | ICD-10-CM | I25.711 | Atherosclerosis of autologous vein coronary artery bypass graft(s) with angina pectoris with documented spasm       |
|                        | ICD-10-CM | I25.718 | Atherosclerosis of autologous vein coronary artery bypass graft(s) with other forms of angina pectoris              |
|                        | ICD-10-CM | I25.719 | Atherosclerosis of autologous vein coronary artery bypass graft(s) with unspecified angina pectoris                 |
|                        | ICD-10-CM | I25.72  | Atherosclerosis of autologous artery coronary artery bypass graft(s) with angina pectoris                           |

|                                  |           |         |                                                                                                                                              |
|----------------------------------|-----------|---------|----------------------------------------------------------------------------------------------------------------------------------------------|
|                                  | ICD-10-CM | I25.721 | Atherosclerosis of autologous artery coronary artery bypass graft(s) with angina pectoris with documented spasm                              |
|                                  | ICD-10-CM | I25.728 | Atherosclerosis of autologous artery coronary artery bypass graft(s) with other forms of angina pectoris                                     |
|                                  | ICD-10-CM | I25.729 | Atherosclerosis of autologous artery coronary artery bypass graft(s) with unspecified angina pectoris                                        |
|                                  | ICD-10-CM | I25.73  | Atherosclerosis of nonautologous biological coronary artery bypass graft(s) with angina pectoris                                             |
|                                  | ICD-10-CM | I25.731 | Atherosclerosis of nonautologous biological coronary artery bypass graft(s) with angina pectoris with documented spasm                       |
|                                  | ICD-10-CM | I25.738 | Atherosclerosis of nonautologous biological coronary artery bypass graft(s) with other forms of angina pectoris                              |
|                                  | ICD-10-CM | I25.739 | Atherosclerosis of nonautologous biological coronary artery bypass graft(s) with unspecified angina pectoris                                 |
|                                  | ICD-10-CM | I25.75  | Atherosclerosis of native coronary artery of transplanted heart with angina pectoris                                                         |
|                                  | ICD-10-CM | I25.751 | Atherosclerosis of native coronary artery of transplanted heart with angina pectoris with documented spasm                                   |
|                                  | ICD-10-CM | I25.758 | Atherosclerosis of native coronary artery of transplanted heart with other forms of angina pectoris                                          |
|                                  | ICD-10-CM | I25.759 | Atherosclerosis of native coronary artery of transplanted heart with unspecified angina pectoris                                             |
|                                  | ICD-10-CM | I25.76  | Atherosclerosis of bypass graft of coronary artery of transplanted heart with angina pectoris                                                |
|                                  | ICD-10-CM | I25.761 | Atherosclerosis of bypass graft of coronary artery of transplanted heart with angina pectoris with documented spasm                          |
|                                  | ICD-10-CM | I25.768 | Atherosclerosis of bypass graft of coronary artery of transplanted heart with other forms of angina pectoris                                 |
|                                  | ICD-10-CM | I25.769 | Atherosclerosis of bypass graft of coronary artery of transplanted heart with unspecified angina pectoris                                    |
|                                  | ICD-10-CM | I25.79  | Atherosclerosis of other coronary artery bypass graft(s) with angina pectoris                                                                |
|                                  | ICD-10-CM | I25.791 | Atherosclerosis of other coronary artery bypass graft(s) with angina pectoris with documented spasm                                          |
|                                  | ICD-10-CM | I25.798 | Atherosclerosis of other coronary artery bypass graft(s) with other forms of angina pectoris                                                 |
|                                  | ICD-10-CM | I25.799 | Atherosclerosis of other coronary artery bypass graft(s) with unspecified angina pectoris                                                    |
| <b>Transient ischemic attack</b> | ICD-9-CM  | 435     | Transient cerebral ischemia                                                                                                                  |
|                                  | ICD-9-CM  | 435.0   | Basilar artery syndrome                                                                                                                      |
|                                  | ICD-9-CM  | 435.1   | Vertebral artery syndrome                                                                                                                    |
|                                  | ICD-9-CM  | 435.2   | Subclavian steal syndrome                                                                                                                    |
|                                  | ICD-9-CM  | 435.3   | Vertebrobasilar artery syndrome                                                                                                              |
|                                  | ICD-9-CM  | 435.8   | Other specified transient cerebral ischemias                                                                                                 |
|                                  | ICD-9-CM  | 435.9   | Unspecified transient cerebral ischemia; Impending cerebrovascular accident; Intermittent cerebral ischemia; Transient ischemic attack [TIA] |
|                                  | ICD-10-CM | G450    | Vertebro-basilar artery syndrome                                                                                                             |
|                                  | ICD-10-CM | G451    | Carotid artery syndrome (hemispheric)                                                                                                        |
|                                  | ICD-10-CM | G452    | Multiple and bilateral precerebral artery syndromes                                                                                          |
|                                  | ICD-10-CM | G453    | Amaurosis fugax                                                                                                                              |
|                                  | ICD-10-CM | G458    | Other transient cerebral ischemic attacks and related syndromes                                                                              |
|                                  | ICD-10-CM | G459    | Transient cerebral ischemic attack, unspecified                                                                                              |
|                                  | ICD-10-CM | G46.0   | Middle cerebral artery syndrome                                                                                                              |

|                                             |           |         |                                                            |
|---------------------------------------------|-----------|---------|------------------------------------------------------------|
|                                             | ICD-10-CM | G46.1   | Anterior cerebral artery syndrome                          |
|                                             | ICD-10-CM | G46.2   | Posterior cerebral artery syndrome                         |
|                                             | ICD-10-CM | I67.848 | Other cerebrovascular vasospasm and vasoconstriction       |
| Coronary<br>Revascularization<br>procedures | CPT/HCPCS | 0075T   | Perq stent/chest vert art                                  |
|                                             | CPT/HCPCS | 0076T   | S&I stent/chest vert art                                   |
|                                             | CPT/HCPCS | 1921    | Angioplasty                                                |
|                                             | CPT/HCPCS | 33621   | Transthor cath for stent                                   |
|                                             | CPT/HCPCS | 36906   | Perq thrmbc/nfs dial circuit teat plmt iv stent            |
|                                             | CPT/HCPCS | 37205   | Transcath iv stent, percut                                 |
|                                             | CPT/HCPCS | 37206   | Transcath iv stent/perc addl                               |
|                                             | CPT/HCPCS | 37207   | Transcath iv stent, open                                   |
|                                             | CPT/HCPCS | 37208   | Transcath iv stent/open addl                               |
|                                             | CPT/HCPCS | 37215   | Transcath stent, cca w/eps                                 |
|                                             | CPT/HCPCS | 37216   | Transcath stent, cca w/o eps                               |
|                                             | CPT/HCPCS | 37217   | Stent placemt retro carotid                                |
|                                             | CPT/HCPCS | 37218   | Stent placemt ante carotid                                 |
|                                             | CPT/HCPCS | 37221   | Iliac revasc w/stent                                       |
|                                             | CPT/HCPCS | 37223   | Iliac revasc w/stent add-on                                |
|                                             | CPT/HCPCS | 37226   | Fem/popl revasc w/stent                                    |
|                                             | CPT/HCPCS | 37230   | Tib/per revasc w/stent                                     |
|                                             | CPT/HCPCS | 37231   | Tib/per revasc stent & ather                               |
|                                             | CPT/HCPCS | 37234   | Revasc opn/prq tib/pero stent                              |
|                                             | CPT/HCPCS | 37236   | Open/perq place stent 1st                                  |
|                                             | CPT/HCPCS | 37237   | Open/perq place stent ea add                               |
|                                             | CPT/HCPCS | 37238   | Open/perq place stent same                                 |
|                                             | CPT/HCPCS | 37239   | Open/perq place stent ea add                               |
|                                             | CPT/HCPCS | 4561F   | Pt w/ coronary artery stent                                |
|                                             | CPT/HCPCS | 4562F   | Pt w/o coronary artery stent                               |
|                                             | CPT/HCPCS | 61630   | Intracranial angioplasty                                   |
|                                             | CPT/HCPCS | 61635   | Intracran angioplsty w/stent                               |
|                                             | CPT/HCPCS | 75960   | Transcath iv stent rs&i                                    |
|                                             | CPT/HCPCS | 75963   | Perc transluminal angioplasty, peripheral artery; complete |
|                                             | CPT/HCPCS | 75979   | Angioplasty; completeprocedure                             |
|                                             | CPT/HCPCS | C1040   | Wallstent, tips                                            |
|                                             | CPT/HCPCS | C1060   | Acs multi-link tristar stent                               |
|                                             | CPT/HCPCS | C1112   | Aneurx stent graft/del cath                                |
|                                             | CPT/HCPCS | C1312   | Magic wallstent--mini                                      |
|                                             | CPT/HCPCS | C1314   | Magic wallstent--long                                      |
|                                             | CPT/HCPCS | C1320   | Wallstent: iliac                                           |
|                                             | CPT/HCPCS | C1375   | Stent, coronary, nir                                       |
|                                             | CPT/HCPCS | C1874   | Stent coated/covr w/delivery system                        |
|                                             | CPT/HCPCS | C1875   | Stent coated/covr w/o deliv system                         |
|                                             | CPT/HCPCS | C2617   | Stent non-cor temp w/o deliv system                        |
|                                             | CPT/HCPCS | C2625   | Stent non-cor temp w/deliv system                          |
|                                             | CPT/HCPCS | C5001   | Memotherm bil stent, sm, med                               |
|                                             | CPT/HCPCS | C5002   | Memotherm bil stent, large                                 |
|                                             | CPT/HCPCS | C5003   | Memotherm bil stent, x-large                               |
|                                             | CPT/HCPCS | C5006   | Palmaztrans bil stentsys-med                               |
|                                             | CPT/HCPCS | C5011   | Intrastent, intrastent lp                                  |
|                                             | CPT/HCPCS | C5012   | Intrastent doublestrut ld                                  |
|                                             | CPT/HCPCS | C5013   | Intrastent doublestrut, xs                                 |
|                                             | CPT/HCPCS | C5014   | Ave bridge stentsys10/17/28                                |
|                                             | CPT/HCPCS | C5020   | Smart nitinol stent--20mm                                  |

|            |         |                                                                        |
|------------|---------|------------------------------------------------------------------------|
| CPT/HCPCS  | C5021   | Smart nitinol stent--40/60mm                                           |
| CPT/HCPCS  | C5022   | Smart nitinol stent--80mm                                              |
| CPT/HCPCS  | C5023   | BX velocity stent--8/13mm                                              |
| CPT/HCPCS  | C5024   | BX velocity stent                                                      |
| CPT/HCPCS  | C5025   | BX velocity stent--23mm                                                |
| CPT/HCPCS  | C5026   | BX velocity stent--28/33mm                                             |
| CPT/HCPCS  | C5030   | Stent, coronary, s660 9/12mm                                           |
| CPT/HCPCS  | C5031   | Stent, coronary, s660 15/18                                            |
| CPT/HCPCS  | C5032   | Stent,coronary, s660 24/30                                             |
| CPT/HCPCS  | C5034   | Nirooyal stent sys, 12/15mm                                            |
| CPT/HCPCS  | C5035   | Nirooyal stent sys, 18mm                                               |
| CPT/HCPCS  | C5036   | Nirooyal stent sys, 25mm                                               |
| CPT/HCPCS  | C5037   | Nirooyal stent sys, 31mm                                               |
| CPT/HCPCS  | C5039   | Intracoil perip stent--40mm                                            |
| CPT/HCPCS  | C5040   | Intracoil periph stent--60mm                                           |
| CPT/HCPCS  | C5041   | Bestent over-the-wire24/30mm                                           |
| CPT/HCPCS  | C5042   | Bestent over-the-wire 18mm                                             |
| CPT/HCPCS  | C5043   | Bestent over-the-wire 15mm                                             |
| CPT/HCPCS  | C5044   | Bestent over-the-wire 9/12mm                                           |
| CPT/HCPCS  | C5045   | Multilink tetra cor stent sy                                           |
| CPT/HCPCS  | C5046   | Radius 20mm cor stent                                                  |
| CPT/HCPCS  | C5047   | Nirooyal elite cor stent sys                                           |
| CPT/HCPCS  | C5048   | Gr ii coronary stent                                                   |
| CPT/HCPCS  | C5130   | Wilson-cook z-stent                                                    |
| CPT/HCPCS  | C5279   | Contour/percuflex stent                                                |
| CPT/HCPCS  | C5283   | Wallstent/rp tips--80mm                                                |
| CPT/HCPCS  | C8522   | Palmaz bal stent                                                       |
| CPT/HCPCS  | C8802   | Oasis stent intro sys                                                  |
| DRG        | 034     | Carotid artery stent proc w mcc                                        |
| DRG        | 035     | Carotid artery stent proc w cc                                         |
| DRG        | 036     | Carotid artery stent proc wo cc/mcc                                    |
| DRG        | 116     | Oth perm card pacemkr impl,ptca w stent                                |
| DRG        | 250     | Perc evase px wo stent w mcc                                           |
| DRG        | 251     | Perc evase px wo stent wo mcc                                          |
| DRG        | 517     | Perc cv prc w non-drug elut stent w/o ami                              |
| DRG        | 518     | Perc cv proc w/o cor art stent or ami                                  |
| DRG        | 526     | Perc cv proc w/ drug elut stent w/ami                                  |
| DRG        | 527     | Perc cv proc w drug elut stent w/o ami                                 |
| DRG        | 556     | Perc cv pr w non-drug stent wo maj cv dx                               |
| DRG        | 557     | Perc cv pr w drug-el stent w maj cv dx                                 |
| DRG        | 558     | Perc cv pr w drug-el stent w/o maj cv dx                               |
| DRG        | 577     | Carotid artery stent procedure                                         |
| ICD-10-PCS | 03CG3Z7 | Extir of matter from intracranial art using stent retriever, perq      |
| ICD-10-PCS | 03CH3Z7 | Extir of matter from rt common carotid art using stent retriever, perq |
| ICD-10-PCS | 03CJ3Z7 | Extir of matter from lt common carotid art using stent retriever, perq |
| ICD-10-PCS | 03CK3Z7 | Extir of matter from rt internal carotid art stent retriever, perq     |
| ICD-10-PCS | 03CL3Z7 | Extir of matter from lt internal carotid art stent retriever, perq     |
| ICD-10-PCS | 03CM3Z7 | Extir of matter from rt external carotid art stent retriever, perq     |
| ICD-10-PCS | 03CN3Z7 | Extir of matter from lt external carotid art stent retriever, perq     |
| ICD-10-PCS | 03CP3Z7 | Extir of matter from rt vertebral art using stent retriever, perq      |
| ICD-10-PCS | 03CQ3Z7 | Extir of matter from lt vertebral art using stent retriever, perq      |
| ICD-9-PCS  | 0045    | Insertion of one vascular stent                                        |

|            |         |                                                                                                      |
|------------|---------|------------------------------------------------------------------------------------------------------|
| ICD-9-PCS  | 0046    | Insertion of two vascular stents                                                                     |
| ICD-9-PCS  | 0047    | Insertion of three vascular stents                                                                   |
| ICD-9-PCS  | 0048    | Insertion 4 or more vascular stents                                                                  |
| ICD-9-PCS  | 0055    | Insert rx-elut stent oth periph ves                                                                  |
| ICD-9-PCS  | 0060    | Insert drug-elut stents sup fem art                                                                  |
| ICD-9-PCS  | 0063    | Perq insertion carotid art stent(s)                                                                  |
| ICD-9-PCS  | 0065    | Perq insrt intracran vasc stent(s)                                                                   |
| ICD-9-PCS  | 0983    | Conjunctivorhinostomy w/tube/stent                                                                   |
| ICD-9-PCS  | 360     | Removal cor art obst&insrtion stent                                                                  |
| ICD-9-PCS  | 3607    | Insertion rx-eluting cor art stent                                                                   |
| CPT/HCPCS  | 33510   | Coronary artery bypass grafting with vein only, 1 graft                                              |
| CPT/HCPCS  | 33511   | Coronary artery bypass grafting with vein only, 2 grafts                                             |
| CPT/HCPCS  | 33512   | Coronary artery bypass grafting with vein only, 3 grafts                                             |
| CPT/HCPCS  | 33513   | Coronary artery bypass grafting with vein only, 4 grafts                                             |
| CPT/HCPCS  | 33514   | Coronary artery bypass grafting with vein only, 5 grafts                                             |
| CPT/HCPCS  | 33516   | Coronary artery bypass grafting with vein only, 6 or more grafts                                     |
| CPT/HCPCS  | 33517   | Coronary artery bypass grafting using venous and arterial grafts, 1 vein graft                       |
| CPT/HCPCS  | 33518   | Coronary artery bypass grafting using venous and arterial grafts, 2 vein grafts                      |
| CPT/HCPCS  | 33519   | Coronary artery bypass grafting using venous and arterial grafts, 3 vein grafts                      |
| CPT/HCPCS  | 33521   | Coronary artery bypass grafting using venous and arterial grafts, 4 vein grafts                      |
| CPT/HCPCS  | 33522   | Coronary artery bypass grafting using venous and arterial grafts, 5 vein grafts                      |
| CPT/HCPCS  | 33523   | Coronary artery bypass grafting using venous and arterial grafts, 6 or more vein grafts              |
| CPT/HCPCS  | 33533   | Coronary artery bypass grafting with artery only, 1 graft                                            |
| CPT/HCPCS  | 33534   | Coronary artery bypass grafting with artery only, 2 grafts                                           |
| CPT/HCPCS  | 33535   | Coronary artery bypass grafting with artery only, 3 grafts                                           |
| CPT/HCPCS  | 33536   | Coronary artery bypass grafting with artery only, 4 or more grafts                                   |
| DRG        | 106     | CORONARY BYPASS WITH PTCA                                                                            |
| DRG        | 107     | CORONARY BYPASS W CARDIAC CATH                                                                       |
| DRG        | 109     | CORONARY BYPASS W/O PTCA OR CARDIAC CATH                                                             |
| DRG        | 231     | CORONARY BYPASS W PTCA W MCC                                                                         |
| DRG        | 232     | CORONARY BYPASS W PTCA WO MCC                                                                        |
| DRG        | 233     | CORONARY BYPASS W CARD CATH W MCC                                                                    |
| DRG        | 234     | CORONARY BYPASS W CARD CATH WO MCC                                                                   |
| DRG        | 235     | CORONARY BYPASS WO CARD CATH W MCC                                                                   |
| DRG        | 236     | CORONARY BYPASS WO CARD CATH WO MCC                                                                  |
| DRG        | 547     | CORONARY BYP W CARD CATH W MAJ CV DX                                                                 |
| DRG        | 548     | CORONARY BYP W CARD CATH W/O MAJ CV DX                                                               |
| DRG        | 549     | CORONARY BYP W/O CARD CATH W MAJ CV DX                                                               |
| DRG        | 550     | CORONARY BYP W/O CARD CATH W/O MAJ CV DX                                                             |
| ICD-10-PCS | 0210083 | Bypass Coronary Artery, One Artery from Coronary Artery with Zooplastic Tissue, Open Approach        |
| ICD-10-PCS | 0210088 | Bypass Coronary Artery, One Artery from Right Internal Mammary with Zooplastic Tissue, Open Approach |
| ICD-10-PCS | 0210089 | Bypass Coronary Artery, One Artery from Left Internal Mammary with Zooplastic Tissue, Open Approach  |
| ICD-10-PCS | 021008C | Bypass Coronary Artery, One Artery from Thoracic Artery with Zooplastic Tissue, Open Approach        |

|            |         |                                                                                                                    |
|------------|---------|--------------------------------------------------------------------------------------------------------------------|
| ICD-10-PCS | 021008F | Bypass Coronary Artery, One Artery from Abdominal Artery with Zooplastic Tissue, Open Approach                     |
| ICD-10-PCS | 021008W | Bypass Coronary Artery, One Artery from Aorta with Zooplastic Tissue, Open Approach                                |
| ICD-10-PCS | 0210093 | Bypass Coronary Artery, One Artery from Coronary Artery with Autologous Venous Tissue, Open Approach               |
| ICD-10-PCS | 0210098 | Bypass Coronary Artery, One Artery from Right Internal Mammary with Autologous Venous Tissue, Open Approach        |
| ICD-10-PCS | 0210099 | Bypass Coronary Artery, One Artery from Left Internal Mammary with Autologous Venous Tissue, Open Approach         |
| ICD-10-PCS | 021009C | Bypass Coronary Artery, One Artery from Thoracic Artery with Autologous Venous Tissue, Open Approach               |
| ICD-10-PCS | 021009F | Bypass Coronary Artery, One Artery from Abdominal Artery with Autologous Venous Tissue, Open Approach              |
| ICD-10-PCS | 021009W | Bypass Coronary Artery, One Artery from Aorta with Autologous Venous Tissue, Open Approach                         |
| ICD-10-PCS | 02100A3 | Bypass Coronary Artery, One Artery from Coronary Artery with Autologous Arterial Tissue, Open Approach             |
| ICD-10-PCS | 02100A8 | Bypass Coronary Artery, One Artery from Right Internal Mammary with Autologous Arterial Tissue, Open Approach      |
| ICD-10-PCS | 02100A9 | Bypass Coronary Artery, One Artery from Left Internal Mammary with Autologous Arterial Tissue, Open Approach       |
| ICD-10-PCS | 02100AC | Bypass Coronary Artery, One Artery from Thoracic Artery with Autologous Arterial Tissue, Open Approach             |
| ICD-10-PCS | 02100AF | Bypass Coronary Artery, One Artery from Abdominal Artery with Autologous Arterial Tissue, Open Approach            |
| ICD-10-PCS | 02100AW | Bypass Coronary Artery, One Artery from Aorta with Autologous Arterial Tissue, Open Approach                       |
| ICD-10-PCS | 02100J3 | Bypass Coronary Artery, One Artery from Coronary Artery with Synthetic Substitute, Open Approach                   |
| ICD-10-PCS | 02100J8 | Bypass Coronary Artery, One Artery from Right Internal Mammary with Synthetic Substitute, Open Approach            |
| ICD-10-PCS | 02100J9 | Bypass Coronary Artery, One Artery from Left Internal Mammary with Synthetic Substitute, Open Approach             |
| ICD-10-PCS | 02100JC | Bypass Coronary Artery, One Artery from Thoracic Artery with Synthetic Substitute, Open Approach                   |
| ICD-10-PCS | 02100JF | Bypass Coronary Artery, One Artery from Abdominal Artery with Synthetic Substitute, Open Approach                  |
| ICD-10-PCS | 02100JW | Bypass Coronary Artery, One Artery from Aorta with Synthetic Substitute, Open Approach                             |
| ICD-10-PCS | 02100K3 | Bypass Coronary Artery, One Artery from Coronary Artery with Nonautologous Tissue Substitute, Open Approach        |
| ICD-10-PCS | 02100K8 | Bypass Coronary Artery, One Artery from Right Internal Mammary with Nonautologous Tissue Substitute, Open Approach |
| ICD-10-PCS | 02100K9 | Bypass Coronary Artery, One Artery from Left Internal Mammary with Nonautologous Tissue Substitute, Open Approach  |
| ICD-10-PCS | 02100KC | Bypass Coronary Artery, One Artery from Thoracic Artery with Nonautologous Tissue Substitute, Open Approach        |
| ICD-10-PCS | 02100KF | Bypass Coronary Artery, One Artery from Abdominal Artery with Nonautologous Tissue Substitute, Open Approach       |
| ICD-10-PCS | 02100KW | Bypass Coronary Artery, One Artery from Aorta with Nonautologous Tissue Substitute, Open Approach                  |



|            |         |                                                                                                                                  |
|------------|---------|----------------------------------------------------------------------------------------------------------------------------------|
| ICD-10-PCS | 02100Z3 | Bypass Coronary Artery, One Artery from Coronary Artery, Open Approach                                                           |
| ICD-10-PCS | 02100Z8 | Bypass Coronary Artery, One Artery from Right Internal Mammary, Open Approach                                                    |
| ICD-10-PCS | 02100Z9 | Bypass Coronary Artery, One Artery from Left Internal Mammary, Open Approach                                                     |
| ICD-10-PCS | 02100ZC | Bypass Coronary Artery, One Artery from Thoracic Artery, Open Approach                                                           |
| ICD-10-PCS | 02100ZF | Bypass Coronary Artery, One Artery from Abdominal Artery, Open Approach                                                          |
| ICD-10-PCS | 0210483 | Bypass Coronary Artery, One Artery from Coronary Artery with Zooplastic Tissue, Percutaneous Endoscopic Approach                 |
| ICD-10-PCS | 0210488 | Bypass Coronary Artery, One Artery from Right Internal Mammary with Zooplastic Tissue, Percutaneous Endoscopic Approach          |
| ICD-10-PCS | 0210489 | Bypass Coronary Artery, One Artery from Left Internal Mammary with Zooplastic Tissue, Percutaneous Endoscopic Approach           |
| ICD-10-PCS | 021048C | Bypass Coronary Artery, One Artery from Thoracic Artery with Zooplastic Tissue, Percutaneous Endoscopic Approach                 |
| ICD-10-PCS | 021048F | Bypass Coronary Artery, One Artery from Abdominal Artery with Zooplastic Tissue, Percutaneous Endoscopic Approach                |
| ICD-10-PCS | 021048W | Bypass Coronary Artery, One Artery from Aorta with Zooplastic Tissue, Percutaneous Endoscopic Approach                           |
| ICD-10-PCS | 0210493 | Bypass Coronary Artery, One Artery from Coronary Artery with Autologous Venous Tissue, Percutaneous Endoscopic Approach          |
| ICD-10-PCS | 0210498 | Bypass Coronary Artery, One Artery from Right Internal Mammary with Autologous Venous Tissue, Percutaneous Endoscopic Approach   |
| ICD-10-PCS | 0210499 | Bypass Coronary Artery, One Artery from Left Internal Mammary with Autologous Venous Tissue, Percutaneous Endoscopic Approach    |
| ICD-10-PCS | 021049C | Bypass Coronary Artery, One Artery from Thoracic Artery with Autologous Venous Tissue, Percutaneous Endoscopic Approach          |
| ICD-10-PCS | 021049F | Bypass Coronary Artery, One Artery from Abdominal Artery with Autologous Venous Tissue, Percutaneous Endoscopic Approach         |
| ICD-10-PCS | 021049W | Bypass Coronary Artery, One Artery from Aorta with Autologous Venous Tissue, Percutaneous Endoscopic Approach                    |
| ICD-10-PCS | 02104A3 | Bypass Coronary Artery, One Artery from Coronary Artery with Autologous Arterial Tissue, Percutaneous Endoscopic Approach        |
| ICD-10-PCS | 02104A8 | Bypass Coronary Artery, One Artery from Right Internal Mammary with Autologous Arterial Tissue, Percutaneous Endoscopic Approach |
| ICD-10-PCS | 02104A9 | Bypass Coronary Artery, One Artery from Left Internal Mammary with Autologous Arterial Tissue, Percutaneous Endoscopic Approach  |
| ICD-10-PCS | 02104AC | Bypass Coronary Artery, One Artery from Thoracic Artery with Autologous Arterial Tissue, Percutaneous Endoscopic Approach        |
| ICD-10-PCS | 02104AF | Bypass Coronary Artery, One Artery from Abdominal Artery with Autologous Arterial Tissue, Percutaneous Endoscopic Approach       |
| ICD-10-PCS | 02104AW | Bypass Coronary Artery, One Artery from Aorta with Autologous Arterial Tissue, Percutaneous Endoscopic Approach                  |

|            |         |                                                                                                                                       |
|------------|---------|---------------------------------------------------------------------------------------------------------------------------------------|
| ICD-10-PCS | 02104J3 | Bypass Coronary Artery, One Artery from Coronary Artery with Synthetic Substitute, Percutaneous Endoscopic Approach                   |
| ICD-10-PCS | 02104J8 | Bypass Coronary Artery, One Artery from Right Internal Mammary with Synthetic Substitute, Percutaneous Endoscopic Approach            |
| ICD-10-PCS | 02104J9 | Bypass Coronary Artery, One Artery from Left Internal Mammary with Synthetic Substitute, Percutaneous Endoscopic Approach             |
| ICD-10-PCS | 02104JC | Bypass Coronary Artery, One Artery from Thoracic Artery with Synthetic Substitute, Percutaneous Endoscopic Approach                   |
| ICD-10-PCS | 02104JF | Bypass Coronary Artery, One Artery from Abdominal Artery with Synthetic Substitute, Percutaneous Endoscopic Approach                  |
| ICD-10-PCS | 02104JW | Bypass Coronary Artery, One Artery from Aorta with Synthetic Substitute, Percutaneous Endoscopic Approach                             |
| ICD-10-PCS | 02104K3 | Bypass Coronary Artery, One Artery from Coronary Artery with Nonautologous Tissue Substitute, Percutaneous Endoscopic Approach        |
| ICD-10-PCS | 02104K8 | Bypass Coronary Artery, One Artery from Right Internal Mammary with Nonautologous Tissue Substitute, Percutaneous Endoscopic Approach |
| ICD-10-PCS | 02104K9 | Bypass Coronary Artery, One Artery from Left Internal Mammary with Nonautologous Tissue Substitute, Percutaneous Endoscopic Approach  |
| ICD-10-PCS | 02104KC | Bypass Coronary Artery, One Artery from Thoracic Artery with Nonautologous Tissue Substitute, Percutaneous Endoscopic Approach        |
| ICD-10-PCS | 02104KF | Bypass Coronary Artery, One Artery from Abdominal Artery with Nonautologous Tissue Substitute, Percutaneous Endoscopic Approach       |
| ICD-10-PCS | 02104KW | Bypass Coronary Artery, One Artery from Aorta with Nonautologous Tissue Substitute, Percutaneous Endoscopic Approach                  |
| ICD-10-PCS | 02104Z3 | Bypass Coronary Artery, One Artery from Coronary Artery, Percutaneous Endoscopic Approach                                             |
| ICD-10-PCS | 02104Z8 | Bypass Coronary Artery, One Artery from Right Internal Mammary, Percutaneous Endoscopic Approach                                      |
| ICD-10-PCS | 02104Z9 | Bypass Coronary Artery, One Artery from Left Internal Mammary, Percutaneous Endoscopic Approach                                       |
| ICD-10-PCS | 02104ZC | Bypass Coronary Artery, One Artery from Thoracic Artery, Percutaneous Endoscopic Approach                                             |
| ICD-10-PCS | 02104ZF | Bypass Coronary Artery, One Artery from Abdominal Artery, Percutaneous Endoscopic Approach                                            |
| ICD-10-PCS | 0211083 | Bypass Coronary Artery, Two Arteries from Coronary Artery with Zooplastic Tissue, Open Approach                                       |
| ICD-10-PCS | 0211088 | Bypass Coronary Artery, Two Arteries from Right Internal Mammary with Zooplastic Tissue, Open Approach                                |
| ICD-10-PCS | 0211089 | Bypass Coronary Artery, Two Arteries from Left Internal Mammary with Zooplastic Tissue, Open Approach                                 |
| ICD-10-PCS | 021108C | Bypass Coronary Artery, Two Arteries from Thoracic Artery with Zooplastic Tissue, Open Approach                                       |
| ICD-10-PCS | 021108F | Bypass Coronary Artery, Two Arteries from Abdominal Artery with Zooplastic Tissue, Open Approach                                      |
| ICD-10-PCS | 021108W | Bypass Coronary Artery, Two Arteries from Aorta with Zooplastic Tissue, Open Approach                                                 |

|            |         |                                                                                                                      |
|------------|---------|----------------------------------------------------------------------------------------------------------------------|
| ICD-10-PCS | 0211093 | Bypass Coronary Artery, Two Arteries from Coronary Artery with Autologous Venous Tissue, Open Approach               |
| ICD-10-PCS | 0211098 | Bypass Coronary Artery, Two Arteries from Right Internal Mammary with Autologous Venous Tissue, Open Approach        |
| ICD-10-PCS | 0211099 | Bypass Coronary Artery, Two Arteries from Left Internal Mammary with Autologous Venous Tissue, Open Approach         |
| ICD-10-PCS | 021109C | Bypass Coronary Artery, Two Arteries from Thoracic Artery with Autologous Venous Tissue, Open Approach               |
| ICD-10-PCS | 021109F | Bypass Coronary Artery, Two Arteries from Abdominal Artery with Autologous Venous Tissue, Open Approach              |
| ICD-10-PCS | 021109W | Bypass Coronary Artery, Two Arteries from Aorta with Autologous Venous Tissue, Open Approach                         |
| ICD-10-PCS | 02110A3 | Bypass Coronary Artery, Two Arteries from Coronary Artery with Autologous Arterial Tissue, Open Approach             |
| ICD-10-PCS | 02110A8 | Bypass Coronary Artery, Two Arteries from Right Internal Mammary with Autologous Arterial Tissue, Open Approach      |
| ICD-10-PCS | 02110A9 | Bypass Coronary Artery, Two Arteries from Left Internal Mammary with Autologous Arterial Tissue, Open Approach       |
| ICD-10-PCS | 02110AC | Bypass Coronary Artery, Two Arteries from Thoracic Artery with Autologous Arterial Tissue, Open Approach             |
| ICD-10-PCS | 02110AF | Bypass Coronary Artery, Two Arteries from Abdominal Artery with Autologous Arterial Tissue, Open Approach            |
| ICD-10-PCS | 02110AW | Bypass Coronary Artery, Two Arteries from Aorta with Autologous Arterial Tissue, Open Approach                       |
| ICD-10-PCS | 02110J3 | Bypass Coronary Artery, Two Arteries from Coronary Artery with Synthetic Substitute, Open Approach                   |
| ICD-10-PCS | 02110J8 | Bypass Coronary Artery, Two Arteries from Right Internal Mammary with Synthetic Substitute, Open Approach            |
| ICD-10-PCS | 02110J9 | Bypass Coronary Artery, Two Arteries from Left Internal Mammary with Synthetic Substitute, Open Approach             |
| ICD-10-PCS | 02110JC | Bypass Coronary Artery, Two Arteries from Thoracic Artery with Synthetic Substitute, Open Approach                   |
| ICD-10-PCS | 02110JF | Bypass Coronary Artery, Two Arteries from Abdominal Artery with Synthetic Substitute, Open Approach                  |
| ICD-10-PCS | 02110JW | Bypass Coronary Artery, Two Arteries from Aorta with Synthetic Substitute, Open Approach                             |
| ICD-10-PCS | 02110K3 | Bypass Coronary Artery, Two Arteries from Coronary Artery with Nonautologous Tissue Substitute, Open Approach        |
| ICD-10-PCS | 02110K8 | Bypass Coronary Artery, Two Arteries from Right Internal Mammary with Nonautologous Tissue Substitute, Open Approach |
| ICD-10-PCS | 02110K9 | Bypass Coronary Artery, Two Arteries from Left Internal Mammary with Nonautologous Tissue Substitute, Open Approach  |
| ICD-10-PCS | 02110KC | Bypass Coronary Artery, Two Arteries from Thoracic Artery with Nonautologous Tissue Substitute, Open Approach        |
| ICD-10-PCS | 02110KF | Bypass Coronary Artery, Two Arteries from Abdominal Artery with Nonautologous Tissue Substitute, Open Approach       |
| ICD-10-PCS | 02110KW | Bypass Coronary Artery, Two Arteries from Aorta with Nonautologous Tissue Substitute, Open Approach                  |
| ICD-10-PCS | 02110Z3 | Bypass Coronary Artery, Two Arteries from Coronary Artery, Open Approach                                             |
| ICD-10-PCS | 02110Z8 | Bypass Coronary Artery, Two Arteries from Right Internal Mammary, Open Approach                                      |

|            |         |                                                                                                                                    |
|------------|---------|------------------------------------------------------------------------------------------------------------------------------------|
| ICD-10-PCS | 02110Z9 | Bypass Coronary Artery, Two Arteries from Left Internal Mammary, Open Approach                                                     |
| ICD-10-PCS | 02110ZC | Bypass Coronary Artery, Two Arteries from Thoracic Artery, Open Approach                                                           |
| ICD-10-PCS | 02110ZF | Bypass Coronary Artery, Two Arteries from Abdominal Artery, Open Approach                                                          |
| ICD-10-PCS | 0211483 | Bypass Coronary Artery, Two Arteries from Coronary Artery with Zooplastic Tissue, Percutaneous Endoscopic Approach                 |
| ICD-10-PCS | 0211488 | Bypass Coronary Artery, Two Arteries from Right Internal Mammary with Zooplastic Tissue, Percutaneous Endoscopic Approach          |
| ICD-10-PCS | 0211489 | Bypass Coronary Artery, Two Arteries from Left Internal Mammary with Zooplastic Tissue, Percutaneous Endoscopic Approach           |
| ICD-10-PCS | 021148C | Bypass Coronary Artery, Two Arteries from Thoracic Artery with Zooplastic Tissue, Percutaneous Endoscopic Approach                 |
| ICD-10-PCS | 021148F | Bypass Coronary Artery, Two Arteries from Abdominal Artery with Zooplastic Tissue, Percutaneous Endoscopic Approach                |
| ICD-10-PCS | 021148W | Bypass Coronary Artery, Two Arteries from Aorta with Zooplastic Tissue, Percutaneous Endoscopic Approach                           |
| ICD-10-PCS | 0211493 | Bypass Coronary Artery, Two Arteries from Coronary Artery with Autologous Venous Tissue, Percutaneous Endoscopic Approach          |
| ICD-10-PCS | 0211498 | Bypass Coronary Artery, Two Arteries from Right Internal Mammary with Autologous Venous Tissue, Percutaneous Endoscopic Approach   |
| ICD-10-PCS | 0211499 | Bypass Coronary Artery, Two Arteries from Left Internal Mammary with Autologous Venous Tissue, Percutaneous Endoscopic Approach    |
| ICD-10-PCS | 021149C | Bypass Coronary Artery, Two Arteries from Thoracic Artery with Autologous Venous Tissue, Percutaneous Endoscopic Approach          |
| ICD-10-PCS | 021149F | Bypass Coronary Artery, Two Arteries from Abdominal Artery with Autologous Venous Tissue, Percutaneous Endoscopic Approach         |
| ICD-10-PCS | 021149W | Bypass Coronary Artery, Two Arteries from Aorta with Autologous Venous Tissue, Percutaneous Endoscopic Approach                    |
| ICD-10-PCS | 02114A3 | Bypass Coronary Artery, Two Arteries from Coronary Artery with Autologous Arterial Tissue, Percutaneous Endoscopic Approach        |
| ICD-10-PCS | 02114A8 | Bypass Coronary Artery, Two Arteries from Right Internal Mammary with Autologous Arterial Tissue, Percutaneous Endoscopic Approach |
| ICD-10-PCS | 02114A9 | Bypass Coronary Artery, Two Arteries from Left Internal Mammary with Autologous Arterial Tissue, Percutaneous Endoscopic Approach  |
| ICD-10-PCS | 02114AC | Bypass Coronary Artery, Two Arteries from Thoracic Artery with Autologous Arterial Tissue, Percutaneous Endoscopic Approach        |
| ICD-10-PCS | 02114AF | Bypass Coronary Artery, Two Arteries from Abdominal Artery with Autologous Arterial Tissue, Percutaneous Endoscopic Approach       |
| ICD-10-PCS | 02114AW | Bypass Coronary Artery, Two Arteries from Aorta with Autologous Arterial Tissue, Percutaneous Endoscopic Approach                  |

|            |         |                                                                                                                                         |
|------------|---------|-----------------------------------------------------------------------------------------------------------------------------------------|
| ICD-10-PCS | 02114J3 | Bypass Coronary Artery, Two Arteries from Coronary Artery with Synthetic Substitute, Percutaneous Endoscopic Approach                   |
| ICD-10-PCS | 02114J8 | Bypass Coronary Artery, Two Arteries from Right Internal Mammary with Synthetic Substitute, Percutaneous Endoscopic Approach            |
| ICD-10-PCS | 02114J9 | Bypass Coronary Artery, Two Arteries from Left Internal Mammary with Synthetic Substitute, Percutaneous Endoscopic Approach             |
| ICD-10-PCS | 02114JC | Bypass Coronary Artery, Two Arteries from Thoracic Artery with Synthetic Substitute, Percutaneous Endoscopic Approach                   |
| ICD-10-PCS | 02114JF | Bypass Coronary Artery, Two Arteries from Abdominal Artery with Synthetic Substitute, Percutaneous Endoscopic Approach                  |
| ICD-10-PCS | 02114JW | Bypass Coronary Artery, Two Arteries from Aorta with Synthetic Substitute, Percutaneous Endoscopic Approach                             |
| ICD-10-PCS | 02114K3 | Bypass Coronary Artery, Two Arteries from Coronary Artery with Nonautologous Tissue Substitute, Percutaneous Endoscopic Approach        |
| ICD-10-PCS | 02114K8 | Bypass Coronary Artery, Two Arteries from Right Internal Mammary with Nonautologous Tissue Substitute, Percutaneous Endoscopic Approach |
| ICD-10-PCS | 02114K9 | Bypass Coronary Artery, Two Arteries from Left Internal Mammary with Nonautologous Tissue Substitute, Percutaneous Endoscopic Approach  |
| ICD-10-PCS | 02114KC | Bypass Coronary Artery, Two Arteries from Thoracic Artery with Nonautologous Tissue Substitute, Percutaneous Endoscopic Approach        |
| ICD-10-PCS | 02114KF | Bypass Coronary Artery, Two Arteries from Abdominal Artery with Nonautologous Tissue Substitute, Percutaneous Endoscopic Approach       |
| ICD-10-PCS | 02114KW | Bypass Coronary Artery, Two Arteries from Aorta with Nonautologous Tissue Substitute, Percutaneous Endoscopic Approach                  |
| ICD-10-PCS | 02114Z3 | Bypass Coronary Artery, Two Arteries from Coronary Artery, Percutaneous Endoscopic Approach                                             |
| ICD-10-PCS | 02114Z8 | Bypass Coronary Artery, Two Arteries from Right Internal Mammary, Percutaneous Endoscopic Approach                                      |
| ICD-10-PCS | 02114Z9 | Bypass Coronary Artery, Two Arteries from Left Internal Mammary, Percutaneous Endoscopic Approach                                       |
| ICD-10-PCS | 02114ZC | Bypass Coronary Artery, Two Arteries from Thoracic Artery, Percutaneous Endoscopic Approach                                             |
| ICD-10-PCS | 02114ZF | Bypass Coronary Artery, Two Arteries from Abdominal Artery, Percutaneous Endoscopic Approach                                            |
| ICD-10-PCS | 0212083 | Bypass Coronary Artery, Three Arteries from Coronary Artery with Zooplastic Tissue, Open Approach                                       |
| ICD-10-PCS | 0212088 | Bypass Coronary Artery, Three Arteries from Right Internal Mammary with Zooplastic Tissue, Open Approach                                |
| ICD-10-PCS | 0212089 | Bypass Coronary Artery, Three Arteries from Left Internal Mammary with Zooplastic Tissue, Open Approach                                 |
| ICD-10-PCS | 021208C | Bypass Coronary Artery, Three Arteries from Thoracic Artery with Zooplastic Tissue, Open Approach                                       |
| ICD-10-PCS | 021208F | Bypass Coronary Artery, Three Arteries from Abdominal Artery with Zooplastic Tissue, Open Approach                                      |
| ICD-10-PCS | 021208W | Bypass Coronary Artery, Three Arteries from Aorta with Zooplastic Tissue, Open Approach                                                 |

|            |         |                                                                                                                        |
|------------|---------|------------------------------------------------------------------------------------------------------------------------|
| ICD-10-PCS | 0212093 | Bypass Coronary Artery, Three Arteries from Coronary Artery with Autologous Venous Tissue, Open Approach               |
| ICD-10-PCS | 0212098 | Bypass Coronary Artery, Three Arteries from Right Internal Mammary with Autologous Venous Tissue, Open Approach        |
| ICD-10-PCS | 0212099 | Bypass Coronary Artery, Three Arteries from Left Internal Mammary with Autologous Venous Tissue, Open Approach         |
| ICD-10-PCS | 021209C | Bypass Coronary Artery, Three Arteries from Thoracic Artery with Autologous Venous Tissue, Open Approach               |
| ICD-10-PCS | 021209F | Bypass Coronary Artery, Three Arteries from Abdominal Artery with Autologous Venous Tissue, Open Approach              |
| ICD-10-PCS | 021209W | Bypass Coronary Artery, Three Arteries from Aorta with Autologous Venous Tissue, Open Approach                         |
| ICD-10-PCS | 02120A3 | Bypass Coronary Artery, Three Arteries from Coronary Artery with Autologous Arterial Tissue, Open Approach             |
| ICD-10-PCS | 02120A8 | Bypass Coronary Artery, Three Arteries from Right Internal Mammary with Autologous Arterial Tissue, Open Approach      |
| ICD-10-PCS | 02120A9 | Bypass Coronary Artery, Three Arteries from Left Internal Mammary with Autologous Arterial Tissue, Open Approach       |
| ICD-10-PCS | 02120AC | Bypass Coronary Artery, Three Arteries from Thoracic Artery with Autologous Arterial Tissue, Open Approach             |
| ICD-10-PCS | 02120AF | Bypass Coronary Artery, Three Arteries from Abdominal Artery with Autologous Arterial Tissue, Open Approach            |
| ICD-10-PCS | 02120AW | Bypass Coronary Artery, Three Arteries from Aorta with Autologous Arterial Tissue, Open Approach                       |
| ICD-10-PCS | 02120J3 | Bypass Coronary Artery, Three Arteries from Coronary Artery with Synthetic Substitute, Open Approach                   |
| ICD-10-PCS | 02120J8 | Bypass Coronary Artery, Three Arteries from Right Internal Mammary with Synthetic Substitute, Open Approach            |
| ICD-10-PCS | 02120J9 | Bypass Coronary Artery, Three Arteries from Left Internal Mammary with Synthetic Substitute, Open Approach             |
| ICD-10-PCS | 02120JC | Bypass Coronary Artery, Three Arteries from Thoracic Artery with Synthetic Substitute, Open Approach                   |
| ICD-10-PCS | 02120JF | Bypass Coronary Artery, Three Arteries from Abdominal Artery with Synthetic Substitute, Open Approach                  |
| ICD-10-PCS | 02120JW | Bypass Coronary Artery, Three Arteries from Aorta with Synthetic Substitute, Open Approach                             |
| ICD-10-PCS | 02120K3 | Bypass Coronary Artery, Three Arteries from Coronary Artery with Nonautologous Tissue Substitute, Open Approach        |
| ICD-10-PCS | 02120K8 | Bypass Coronary Artery, Three Arteries from Right Internal Mammary with Nonautologous Tissue Substitute, Open Approach |
| ICD-10-PCS | 02120K9 | Bypass Coronary Artery, Three Arteries from Left Internal Mammary with Nonautologous Tissue Substitute, Open Approach  |
| ICD-10-PCS | 02120KC | Bypass Coronary Artery, Three Arteries from Thoracic Artery with Nonautologous Tissue Substitute, Open Approach        |
| ICD-10-PCS | 02120KF | Bypass Coronary Artery, Three Arteries from Abdominal Artery with Nonautologous Tissue Substitute, Open Approach       |
| ICD-10-PCS | 02120KW | Bypass Coronary Artery, Three Arteries from Aorta with Nonautologous Tissue Substitute, Open Approach                  |
| ICD-10-PCS | 02120Z3 | Bypass Coronary Artery, Three Arteries from Coronary Artery, Open Approach                                             |
| ICD-10-PCS | 02120Z8 | Bypass Coronary Artery, Three Arteries from Right Internal Mammary, Open Approach                                      |

|            |         |                                                                                                                                      |
|------------|---------|--------------------------------------------------------------------------------------------------------------------------------------|
| ICD-10-PCS | 02120Z9 | Bypass Coronary Artery, Three Arteries from Left Internal Mammary, Open Approach                                                     |
| ICD-10-PCS | 02120ZC | Bypass Coronary Artery, Three Arteries from Thoracic Artery, Open Approach                                                           |
| ICD-10-PCS | 02120ZF | Bypass Coronary Artery, Three Arteries from Abdominal Artery, Open Approach                                                          |
| ICD-10-PCS | 0212483 | Bypass Coronary Artery, Three Arteries from Coronary Artery with Zooplastic Tissue, Percutaneous Endoscopic Approach                 |
| ICD-10-PCS | 0212488 | Bypass Coronary Artery, Three Arteries from Right Internal Mammary with Zooplastic Tissue, Percutaneous Endoscopic Approach          |
| ICD-10-PCS | 0212489 | Bypass Coronary Artery, Three Arteries from Left Internal Mammary with Zooplastic Tissue, Percutaneous Endoscopic Approach           |
| ICD-10-PCS | 021248C | Bypass Coronary Artery, Three Arteries from Thoracic Artery with Zooplastic Tissue, Percutaneous Endoscopic Approach                 |
| ICD-10-PCS | 021248F | Bypass Coronary Artery, Three Arteries from Abdominal Artery with Zooplastic Tissue, Percutaneous Endoscopic Approach                |
| ICD-10-PCS | 021248W | Bypass Coronary Artery, Three Arteries from Aorta with Zooplastic Tissue, Percutaneous Endoscopic Approach                           |
| ICD-10-PCS | 0212493 | Bypass Coronary Artery, Three Arteries from Coronary Artery with Autologous Venous Tissue, Percutaneous Endoscopic Approach          |
| ICD-10-PCS | 0212498 | Bypass Coronary Artery, Three Arteries from Right Internal Mammary with Autologous Venous Tissue, Percutaneous Endoscopic Approach   |
| ICD-10-PCS | 0212499 | Bypass Coronary Artery, Three Arteries from Left Internal Mammary with Autologous Venous Tissue, Percutaneous Endoscopic Approach    |
| ICD-10-PCS | 021249C | Bypass Coronary Artery, Three Arteries from Thoracic Artery with Autologous Venous Tissue, Percutaneous Endoscopic Approach          |
| ICD-10-PCS | 021249F | Bypass Coronary Artery, Three Arteries from Abdominal Artery with Autologous Venous Tissue, Percutaneous Endoscopic Approach         |
| ICD-10-PCS | 021249W | Bypass Coronary Artery, Three Arteries from Aorta with Autologous Venous Tissue, Percutaneous Endoscopic Approach                    |
| ICD-10-PCS | 02124A3 | Bypass Coronary Artery, Three Arteries from Coronary Artery with Autologous Arterial Tissue, Percutaneous Endoscopic Approach        |
| ICD-10-PCS | 02124A8 | Bypass Coronary Artery, Three Arteries from Right Internal Mammary with Autologous Arterial Tissue, Percutaneous Endoscopic Approach |
| ICD-10-PCS | 02124A9 | Bypass Coronary Artery, Three Arteries from Left Internal Mammary with Autologous Arterial Tissue, Percutaneous Endoscopic Approach  |
| ICD-10-PCS | 02124AC | Bypass Coronary Artery, Three Arteries from Thoracic Artery with Autologous Arterial Tissue, Percutaneous Endoscopic Approach        |
| ICD-10-PCS | 02124AF | Bypass Coronary Artery, Three Arteries from Abdominal Artery with Autologous Arterial Tissue, Percutaneous Endoscopic Approach       |
| ICD-10-PCS | 02124AW | Bypass Coronary Artery, Three Arteries from Aorta with Autologous Arterial Tissue, Percutaneous Endoscopic Approach                  |

|            |         |                                                                                                                                           |
|------------|---------|-------------------------------------------------------------------------------------------------------------------------------------------|
| ICD-10-PCS | 02124J3 | Bypass Coronary Artery, Three Arteries from Coronary Artery with Synthetic Substitute, Percutaneous Endoscopic Approach                   |
| ICD-10-PCS | 02124J8 | Bypass Coronary Artery, Three Arteries from Right Internal Mammary with Synthetic Substitute, Percutaneous Endoscopic Approach            |
| ICD-10-PCS | 02124J9 | Bypass Coronary Artery, Three Arteries from Left Internal Mammary with Synthetic Substitute, Percutaneous Endoscopic Approach             |
| ICD-10-PCS | 02124JC | Bypass Coronary Artery, Three Arteries from Thoracic Artery with Synthetic Substitute, Percutaneous Endoscopic Approach                   |
| ICD-10-PCS | 02124JF | Bypass Coronary Artery, Three Arteries from Abdominal Artery with Synthetic Substitute, Percutaneous Endoscopic Approach                  |
| ICD-10-PCS | 02124JW | Bypass Coronary Artery, Three Arteries from Aorta with Synthetic Substitute, Percutaneous Endoscopic Approach                             |
| ICD-10-PCS | 02124K3 | Bypass Coronary Artery, Three Arteries from Coronary Artery with Nonautologous Tissue Substitute, Percutaneous Endoscopic Approach        |
| ICD-10-PCS | 02124K8 | Bypass Coronary Artery, Three Arteries from Right Internal Mammary with Nonautologous Tissue Substitute, Percutaneous Endoscopic Approach |
| ICD-10-PCS | 02124K9 | Bypass Coronary Artery, Three Arteries from Left Internal Mammary with Nonautologous Tissue Substitute, Percutaneous Endoscopic Approach  |
| ICD-10-PCS | 02124KC | Bypass Coronary Artery, Three Arteries from Thoracic Artery with Nonautologous Tissue Substitute, Percutaneous Endoscopic Approach        |
| ICD-10-PCS | 02124KF | Bypass Coronary Artery, Three Arteries from Abdominal Artery with Nonautologous Tissue Substitute, Percutaneous Endoscopic Approach       |
| ICD-10-PCS | 02124KW | Bypass Coronary Artery, Three Arteries from Aorta with Nonautologous Tissue Substitute, Percutaneous Endoscopic Approach                  |
| ICD-10-PCS | 02124Z3 | Bypass Coronary Artery, Three Arteries from Coronary Artery, Percutaneous Endoscopic Approach                                             |
| ICD-10-PCS | 02124Z8 | Bypass Coronary Artery, Three Arteries from Right Internal Mammary, Percutaneous Endoscopic Approach                                      |
| ICD-10-PCS | 02124Z9 | Bypass Coronary Artery, Three Arteries from Left Internal Mammary, Percutaneous Endoscopic Approach                                       |
| ICD-10-PCS | 02124ZC | Bypass Coronary Artery, Three Arteries from Thoracic Artery, Percutaneous Endoscopic Approach                                             |
| ICD-10-PCS | 02124ZF | Bypass Coronary Artery, Three Arteries from Abdominal Artery, Percutaneous Endoscopic Approach                                            |
| ICD-10-PCS | 0213083 | Bypass Coronary Artery, Four or More Arteries from Coronary Artery with Zooplastic Tissue, Open Approach                                  |
| ICD-10-PCS | 0213088 | Bypass Coronary Artery, Four or More Arteries from Right Internal Mammary with Zooplastic Tissue, Open Approach                           |
| ICD-10-PCS | 0213089 | Bypass Coronary Artery, Four or More Arteries from Left Internal Mammary with Zooplastic Tissue, Open Approach                            |
| ICD-10-PCS | 021308C | Bypass Coronary Artery, Four or More Arteries from Thoracic Artery with Zooplastic Tissue, Open Approach                                  |
| ICD-10-PCS | 021308F | Bypass Coronary Artery, Four or More Arteries from Abdominal Artery with Zooplastic Tissue, Open Approach                                 |
| ICD-10-PCS | 021308W | Bypass Coronary Artery, Four or More Arteries from Aorta with Zooplastic Tissue, Open Approach                                            |



|            |         |                                                                                                                               |
|------------|---------|-------------------------------------------------------------------------------------------------------------------------------|
| ICD-10-PCS | 0213093 | Bypass Coronary Artery, Four or More Arteries from Coronary Artery with Autologous Venous Tissue, Open Approach               |
| ICD-10-PCS | 0213098 | Bypass Coronary Artery, Four or More Arteries from Right Internal Mammary with Autologous Venous Tissue, Open Approach        |
| ICD-10-PCS | 0213099 | Bypass Coronary Artery, Four or More Arteries from Left Internal Mammary with Autologous Venous Tissue, Open Approach         |
| ICD-10-PCS | 021309C | Bypass Coronary Artery, Four or More Arteries from Thoracic Artery with Autologous Venous Tissue, Open Approach               |
| ICD-10-PCS | 021309F | Bypass Coronary Artery, Four or More Arteries from Abdominal Artery with Autologous Venous Tissue, Open Approach              |
| ICD-10-PCS | 021309W | Bypass Coronary Artery, Four or More Arteries from Aorta with Autologous Venous Tissue, Open Approach                         |
| ICD-10-PCS | 02130A3 | Bypass Coronary Artery, Four or More Arteries from Coronary Artery with Autologous Arterial Tissue, Open Approach             |
| ICD-10-PCS | 02130A8 | Bypass Coronary Artery, Four or More Arteries from Right Internal Mammary with Autologous Arterial Tissue, Open Approach      |
| ICD-10-PCS | 02130A9 | Bypass Coronary Artery, Four or More Arteries from Left Internal Mammary with Autologous Arterial Tissue, Open Approach       |
| ICD-10-PCS | 02130AC | Bypass Coronary Artery, Four or More Arteries from Thoracic Artery with Autologous Arterial Tissue, Open Approach             |
| ICD-10-PCS | 02130AF | Bypass Coronary Artery, Four or More Arteries from Abdominal Artery with Autologous Arterial Tissue, Open Approach            |
| ICD-10-PCS | 02130AW | Bypass Coronary Artery, Four or More Arteries from Aorta with Autologous Arterial Tissue, Open Approach                       |
| ICD-10-PCS | 02130J3 | Bypass Coronary Artery, Four or More Arteries from Coronary Artery with Synthetic Substitute, Open Approach                   |
| ICD-10-PCS | 02130J8 | Bypass Coronary Artery, Four or More Arteries from Right Internal Mammary with Synthetic Substitute, Open Approach            |
| ICD-10-PCS | 02130J9 | Bypass Coronary Artery, Four or More Arteries from Left Internal Mammary with Synthetic Substitute, Open Approach             |
| ICD-10-PCS | 02130JC | Bypass Coronary Artery, Four or More Arteries from Thoracic Artery with Synthetic Substitute, Open Approach                   |
| ICD-10-PCS | 02130JF | Bypass Coronary Artery, Four or More Arteries from Abdominal Artery with Synthetic Substitute, Open Approach                  |
| ICD-10-PCS | 02130JW | Bypass Coronary Artery, Four or More Arteries from Aorta with Synthetic Substitute, Open Approach                             |
| ICD-10-PCS | 02130K3 | Bypass Coronary Artery, Four or More Arteries from Coronary Artery with Nonautologous Tissue Substitute, Open Approach        |
| ICD-10-PCS | 02130K8 | Bypass Coronary Artery, Four or More Arteries from Right Internal Mammary with Nonautologous Tissue Substitute, Open Approach |
| ICD-10-PCS | 02130K9 | Bypass Coronary Artery, Four or More Arteries from Left Internal Mammary with Nonautologous Tissue Substitute, Open Approach  |
| ICD-10-PCS | 02130KC | Bypass Coronary Artery, Four or More Arteries from Thoracic Artery with Nonautologous Tissue Substitute, Open Approach        |
| ICD-10-PCS | 02130KF | Bypass Coronary Artery, Four or More Arteries from Abdominal Artery with Nonautologous Tissue Substitute, Open Approach       |
| ICD-10-PCS | 02130KW | Bypass Coronary Artery, Four or More Arteries from Aorta with Nonautologous Tissue Substitute, Open Approach                  |

|            |         |                                                                                                                                             |
|------------|---------|---------------------------------------------------------------------------------------------------------------------------------------------|
| ICD-10-PCS | 02130Z3 | Bypass Coronary Artery, Four or More Arteries from Coronary Artery, Open Approach                                                           |
| ICD-10-PCS | 02130Z8 | Bypass Coronary Artery, Four or More Arteries from Right Internal Mammary, Open Approach                                                    |
| ICD-10-PCS | 02130Z9 | Bypass Coronary Artery, Four or More Arteries from Left Internal Mammary, Open Approach                                                     |
| ICD-10-PCS | 02130ZC | Bypass Coronary Artery, Four or More Arteries from Thoracic Artery, Open Approach                                                           |
| ICD-10-PCS | 02130ZF | Bypass Coronary Artery, Four or More Arteries from Abdominal Artery, Open Approach                                                          |
| ICD-10-PCS | 0213483 | Bypass Coronary Artery, Four or More Arteries from Coronary Artery with Zooplastic Tissue, Percutaneous Endoscopic Approach                 |
| ICD-10-PCS | 0213488 | Bypass Coronary Artery, Four or More Arteries from Right Internal Mammary with Zooplastic Tissue, Percutaneous Endoscopic Approach          |
| ICD-10-PCS | 0213489 | Bypass Coronary Artery, Four or More Arteries from Left Internal Mammary with Zooplastic Tissue, Percutaneous Endoscopic Approach           |
| ICD-10-PCS | 021348C | Bypass Coronary Artery, Four or More Arteries from Thoracic Artery with Zooplastic Tissue, Percutaneous Endoscopic Approach                 |
| ICD-10-PCS | 021348F | Bypass Coronary Artery, Four or More Arteries from Abdominal Artery with Zooplastic Tissue, Percutaneous Endoscopic Approach                |
| ICD-10-PCS | 021348W | Bypass Coronary Artery, Four or More Arteries from Aorta with Zooplastic Tissue, Percutaneous Endoscopic Approach                           |
| ICD-10-PCS | 0213493 | Bypass Coronary Artery, Four or More Arteries from Coronary Artery with Autologous Venous Tissue, Percutaneous Endoscopic Approach          |
| ICD-10-PCS | 0213498 | Bypass Coronary Artery, Four or More Arteries from Right Internal Mammary with Autologous Venous Tissue, Percutaneous Endoscopic Approach   |
| ICD-10-PCS | 0213499 | Bypass Coronary Artery, Four or More Arteries from Left Internal Mammary with Autologous Venous Tissue, Percutaneous Endoscopic Approach    |
| ICD-10-PCS | 021349C | Bypass Coronary Artery, Four or More Arteries from Thoracic Artery with Autologous Venous Tissue, Percutaneous Endoscopic Approach          |
| ICD-10-PCS | 021349F | Bypass Coronary Artery, Four or More Arteries from Abdominal Artery with Autologous Venous Tissue, Percutaneous Endoscopic Approach         |
| ICD-10-PCS | 021349W | Bypass Coronary Artery, Four or More Arteries from Aorta with Autologous Venous Tissue, Percutaneous Endoscopic Approach                    |
| ICD-10-PCS | 02134A3 | Bypass Coronary Artery, Four or More Arteries from Coronary Artery with Autologous Arterial Tissue, Percutaneous Endoscopic Approach        |
| ICD-10-PCS | 02134A8 | Bypass Coronary Artery, Four or More Arteries from Right Internal Mammary with Autologous Arterial Tissue, Percutaneous Endoscopic Approach |
| ICD-10-PCS | 02134A9 | Bypass Coronary Artery, Four or More Arteries from Left Internal Mammary with Autologous Arterial Tissue, Percutaneous Endoscopic Approach  |

|            |         |                                                                                                                                                  |
|------------|---------|--------------------------------------------------------------------------------------------------------------------------------------------------|
| ICD-10-PCS | 02134AC | Bypass Coronary Artery, Four or More Arteries from Thoracic Artery with Autologous Arterial Tissue, Percutaneous Endoscopic Approach             |
| ICD-10-PCS | 02134AF | Bypass Coronary Artery, Four or More Arteries from Abdominal Artery with Autologous Arterial Tissue, Percutaneous Endoscopic Approach            |
| ICD-10-PCS | 02134AW | Bypass Coronary Artery, Four or More Arteries from Aorta with Autologous Arterial Tissue, Percutaneous Endoscopic Approach                       |
| ICD-10-PCS | 02134J3 | Bypass Coronary Artery, Four or More Arteries from Coronary Artery with Synthetic Substitute, Percutaneous Endoscopic Approach                   |
| ICD-10-PCS | 02134J8 | Bypass Coronary Artery, Four or More Arteries from Right Internal Mammery with Synthetic Substitute, Percutaneous Endoscopic Approach            |
| ICD-10-PCS | 02134J9 | Bypass Coronary Artery, Four or More Arteries from Left Internal Mammery with Synthetic Substitute, Percutaneous Endoscopic Approach             |
| ICD-10-PCS | 02134JC | Bypass Coronary Artery, Four or More Arteries from Thoracic Artery with Synthetic Substitute, Percutaneous Endoscopic Approach                   |
| ICD-10-PCS | 02134JF | Bypass Coronary Artery, Four or More Arteries from Abdominal Artery with Synthetic Substitute, Percutaneous Endoscopic Approach                  |
| ICD-10-PCS | 02134JW | Bypass Coronary Artery, Four or More Arteries from Aorta with Synthetic Substitute, Percutaneous Endoscopic Approach                             |
| ICD-10-PCS | 02134K3 | Bypass Coronary Artery, Four or More Arteries from Coronary Artery with Nonautologous Tissue Substitute, Percutaneous Endoscopic Approach        |
| ICD-10-PCS | 02134K8 | Bypass Coronary Artery, Four or More Arteries from Right Internal Mammery with Nonautologous Tissue Substitute, Percutaneous Endoscopic Approach |
| ICD-10-PCS | 02134K9 | Bypass Coronary Artery, Four or More Arteries from Left Internal Mammery with Nonautologous Tissue Substitute, Percutaneous Endoscopic Approach  |
| ICD-10-PCS | 02134KC | Bypass Coronary Artery, Four or More Arteries from Thoracic Artery with Nonautologous Tissue Substitute, Percutaneous Endoscopic Approach        |
| ICD-10-PCS | 02134KF | Bypass Coronary Artery, Four or More Arteries from Abdominal Artery with Nonautologous Tissue Substitute, Percutaneous Endoscopic Approach       |
| ICD-10-PCS | 02134KW | Bypass Coronary Artery, Four or More Arteries from Aorta with Nonautologous Tissue Substitute, Percutaneous Endoscopic Approach                  |
| ICD-10-PCS | 02134Z3 | Bypass Coronary Artery, Four or More Arteries from Coronary Artery, Percutaneous Endoscopic Approach                                             |
| ICD-10-PCS | 02134Z8 | Bypass Coronary Artery, Four or More Arteries from Right Internal Mammery, Percutaneous Endoscopic Approach                                      |
| ICD-10-PCS | 02134Z9 | Bypass Coronary Artery, Four or More Arteries from Left Internal Mammery, Percutaneous Endoscopic Approach                                       |
| ICD-10-PCS | 02134ZC | Bypass Coronary Artery, Four or More Arteries from Thoracic Artery, Percutaneous Endoscopic Approach                                             |
| ICD-10-PCS | 02134ZF | Bypass Coronary Artery, Four or More Arteries from Abdominal Artery, Percutaneous Endoscopic Approach                                            |
| ICD-10-PCS | B212    | Coronary Artery Bypass Graft, Single                                                                                                             |
| ICD-10-PCS | B213    | Coronary Artery Bypass Graft, Multiple                                                                                                           |

|            |         |                                                                   |
|------------|---------|-------------------------------------------------------------------|
| ICD-9-PCS  | 3610    | Aortocoronary bypass, unspecified                                 |
| ICD-9-PCS  | 3611    | Aortocoronary bypass of 1 coronary artery                         |
| ICD-9-PCS  | 3612    | Aortocoronary bypass of 2 coronary arteries                       |
| ICD-9-PCS  | 3613    | Aortocoronary bypass of 3 coronary arteries                       |
| ICD-9-PCS  | 3614    | Aortocoronary bypass of 4 or more coronary arteries               |
| ICD-9-PCS  | 3615    | Single internal mammary-coronary artery bypass                    |
| ICD-9-PCS  | 3616    | Double internal mammary-coronary artery bypass                    |
| ICD-9-PCS  | 3617    | Abdominal-coronary artery bypass                                  |
| ICD-9-PCS  | 3619    | Other bypass anastomosis for heart revascularization              |
| ICD-9-PCS  | 41402   | Coronary atherosclerosis of autologous vein bypass graft          |
| ICD-9-PCS  | 41403   | Coronary atherosclerosis of nonautologous biological bypass graft |
| ICD-9-PCS  | 41404   | Coronary atherosclerosis of artery bypass graft                   |
| ICD-9-PCS  | 41405   | Coronary atherosclerosis of unspecified type of bypass graft      |
| ICD-9-PCS  | 99603   | Mechanical complication due to coronary bypass graft              |
| ICD-9-PCS  | V4581   | Aortocoronary bypass status                                       |
| CPT/HCPCS  | 33572   | OPEN CORONARY ENDARTERECTOMY                                      |
| ICD-10-PCS | 02CP0ZZ | Extirpation of Matter from Pulmonary Trunk                        |
| ICD-10-PCS | 02CP4ZZ | Extirpation of Matter from Pulmonary Trunk                        |
| ICD-10-PCS | 02CQ0ZZ | Extirpation of Matter from Right Pulmonary Artery                 |
| ICD-10-PCS | 02CQ4ZZ | Extirpation of Matter from Right Pulmonary Artery                 |
| ICD-10-PCS | 02CR0ZZ | Extirpation of Matter from Left Pulmonary Artery                  |
| ICD-10-PCS | 02CR4ZZ | Extirpation of Matter from Left Pulmonary Artery                  |
| ICD-10-PCS | 02CS0ZZ | Extirpation of Matter from Right Pulmonary Vein                   |
| ICD-10-PCS | 02CS4ZZ | Extirpation of Matter from Right Pulmonary Vein                   |
| ICD-10-PCS | 02CT0ZZ | Extirpation of Matter from Left Pulmonary Vein                    |
| ICD-10-PCS | 02CT4ZZ | Extirpation of Matter from Left Pulmonary Vein                    |
| ICD-10-PCS | 02CV0ZZ | Extirpation of Matter from Superior Vena Cava                     |
| ICD-10-PCS | 02CV4ZZ | Extirpation of Matter from Superior Vena Cava                     |
| ICD-10-PCS | 02CW0ZZ | Extirpation of Matter from Thoracic Aorta                         |
| ICD-10-PCS | 02CW4ZZ | Extirpation of Matter from Thoracic Aorta                         |
| ICD-10-PCS | 02CX0ZZ | Extirpation of Matter from Thoracic Aorta                         |
| ICD-10-PCS | 02CX4ZZ | Extirpation of Matter from Thoracic Aorta                         |
| ICD-10-PCS | 03C00ZZ | Extirpation of Matter from Right Internal Mammary Artery          |
| ICD-10-PCS | 03C04ZZ | Extirpation of Matter from Right Internal Mammary Artery          |
| ICD-10-PCS | 03C10ZZ | Extirpation of Matter from Left Internal Mammary Artery           |
| ICD-10-PCS | 03C14ZZ | Extirpation of Matter from Left Internal Mammary Artery           |
| ICD-10-PCS | 03C20ZZ | Extirpation of Matter from Innominate Artery                      |
| ICD-10-PCS | 03C24ZZ | Extirpation of Matter from Innominate Artery                      |
| ICD-10-PCS | 03C30ZZ | Extirpation of Matter from Right Subclavian Artery                |
| ICD-10-PCS | 03C34ZZ | Extirpation of Matter from Right Subclavian Artery                |
| ICD-10-PCS | 03C40ZZ | Extirpation of Matter from Left Subclavian Artery                 |
| ICD-10-PCS | 03C44ZZ | Extirpation of Matter from Left Subclavian Artery                 |
| ICD-10-PCS | 03C50ZZ | Extirpation of Matter from Right Axillary Artery                  |
| ICD-10-PCS | 03C53ZZ | Extirpation of Matter from Right Axillary Artery                  |
| ICD-10-PCS | 03C54ZZ | Extirpation of Matter from Right Axillary Artery                  |
| ICD-10-PCS | 03C60ZZ | Extirpation of Matter from Left Axillary Artery                   |
| ICD-10-PCS | 03C63ZZ | Extirpation of Matter from Left Axillary Artery                   |
| ICD-10-PCS | 03C64ZZ | Extirpation of Matter from Left Axillary Artery                   |
| ICD-10-PCS | 03C70ZZ | Extirpation of Matter from Right Brachial Artery                  |
| ICD-10-PCS | 03C73ZZ | Extirpation of Matter from Right Brachial Artery                  |
| ICD-10-PCS | 03C74ZZ | Extirpation of Matter from Right Brachial Artery                  |
| ICD-10-PCS | 03C80ZZ | Extirpation of Matter from Left Brachial Artery                   |
| ICD-10-PCS | 03C83ZZ | Extirpation of Matter from Left Brachial Artery                   |

|            |         |                                                          |
|------------|---------|----------------------------------------------------------|
| ICD-10-PCS | 03C84ZZ | Extirpation of Matter from Left Brachial Artery          |
| ICD-10-PCS | 03C90ZZ | Extirpation of Matter from Right Ulnar Artery            |
| ICD-10-PCS | 03C93ZZ | Extirpation of Matter from Right Ulnar Artery            |
| ICD-10-PCS | 03C94ZZ | Extirpation of Matter from Right Ulnar Artery            |
| ICD-10-PCS | 03CA0ZZ | Extirpation of Matter from Left Ulnar Artery             |
| ICD-10-PCS | 03CA3ZZ | Extirpation of Matter from Left Ulnar Artery             |
| ICD-10-PCS | 03CA4ZZ | Extirpation of Matter from Left Ulnar Artery             |
| ICD-10-PCS | 03CB0ZZ | Extirpation of Matter from Right Radial Artery           |
| ICD-10-PCS | 03CB3ZZ | Extirpation of Matter from Right Radial Artery           |
| ICD-10-PCS | 03CB4ZZ | Extirpation of Matter from Right Radial Artery           |
| ICD-10-PCS | 03CC0ZZ | Extirpation of Matter from Left Radial Artery            |
| ICD-10-PCS | 03CC3ZZ | Extirpation of Matter from Left Radial Artery            |
| ICD-10-PCS | 03CC4ZZ | Extirpation of Matter from Left Radial Artery            |
| ICD-10-PCS | 03CD0ZZ | Extirpation of Matter from Right Hand Artery             |
| ICD-10-PCS | 03CD3ZZ | Extirpation of Matter from Right Hand Artery             |
| ICD-10-PCS | 03CD4ZZ | Extirpation of Matter from Right Hand Artery             |
| ICD-10-PCS | 03CF0ZZ | Extirpation of Matter from Left Hand Artery              |
| ICD-10-PCS | 03CF3ZZ | Extirpation of Matter from Left Hand Artery              |
| ICD-10-PCS | 03CF4ZZ | Extirpation of Matter from Left Hand Artery              |
| ICD-10-PCS | 03CG0ZZ | Extirpation of Matter from Intracranial Artery           |
| ICD-10-PCS | 03CH0ZZ | Extirpation of Matter from Right Common Carotid Artery   |
| ICD-10-PCS | 03CJ0ZZ | Extirpation of Matter from Left Common Carotid Artery    |
| ICD-10-PCS | 03CK0ZZ | Extirpation of Matter from Right Internal Carotid Artery |
| ICD-10-PCS | 03CL0ZZ | Extirpation of Matter from Left Internal Carotid Artery  |
| ICD-10-PCS | 03CM0ZZ | Extirpation of Matter from Right External Carotid Artery |
| ICD-10-PCS | 03CN0ZZ | Extirpation of Matter from Left External Carotid Artery  |
| ICD-10-PCS | 03CP0ZZ | Extirpation of Matter from Right Vertebral Artery        |
| ICD-10-PCS | 03CQ0ZZ | Extirpation of Matter from Left Vertebral Artery         |
| ICD-10-PCS | 03CR0ZZ | Extirpation of Matter from Face Artery                   |
| ICD-10-PCS | 03CS0ZZ | Extirpation of Matter from Right Temporal Artery         |
| ICD-10-PCS | 03CT0ZZ | Extirpation of Matter from Left Temporal Artery          |
| ICD-10-PCS | 03CU0ZZ | Extirpation of Matter from Right Thyroid Artery          |
| ICD-10-PCS | 03CV0ZZ | Extirpation of Matter from Left Thyroid Artery           |
| ICD-10-PCS | 03CY0ZZ | Extirpation of Matter from Upper Artery                  |
| ICD-10-PCS | 03CY3ZZ | Extirpation of Matter from Upper Artery                  |
| ICD-10-PCS | 03CY4ZZ | Extirpation of Matter from Upper Artery                  |
| ICD-10-PCS | 04C00ZZ | Extirpation of Matter from Abdominal Aorta               |
| ICD-10-PCS | 04C04ZZ | Extirpation of Matter from Abdominal Aorta               |
| ICD-10-PCS | 04C10ZZ | Extirpation of Matter from Celiac Artery                 |
| ICD-10-PCS | 04C14ZZ | Extirpation of Matter from Celiac Artery                 |
| ICD-10-PCS | 04C20ZZ | Extirpation of Matter from Gastric Artery                |
| ICD-10-PCS | 04C24ZZ | Extirpation of Matter from Gastric Artery                |
| ICD-10-PCS | 04C30ZZ | Extirpation of Matter from Hepatic Artery                |
| ICD-10-PCS | 04C34ZZ | Extirpation of Matter from Hepatic Artery                |
| ICD-10-PCS | 04C40ZZ | Extirpation of Matter from Splenic Artery                |
| ICD-10-PCS | 04C44ZZ | Extirpation of Matter from Splenic Artery                |
| ICD-10-PCS | 04C50ZZ | Extirpation of Matter from Superior Mesenteric Artery    |
| ICD-10-PCS | 04C54ZZ | Extirpation of Matter from Superior Mesenteric Artery    |
| ICD-10-PCS | 04C60ZZ | Extirpation of Matter from Right Colic Artery            |
| ICD-10-PCS | 04C64ZZ | Extirpation of Matter from Right Colic Artery            |
| ICD-10-PCS | 04C70ZZ | Extirpation of Matter from Left Colic Artery             |
| ICD-10-PCS | 04C74ZZ | Extirpation of Matter from Left Colic Artery             |
| ICD-10-PCS | 04C80ZZ | Extirpation of Matter from Middle Colic Artery           |

|            |         |                                                          |
|------------|---------|----------------------------------------------------------|
| ICD-10-PCS | 04C84ZZ | Extirpation of Matter from Middle Colic Artery           |
| ICD-10-PCS | 04C90ZZ | Extirpation of Matter from Right Renal Artery            |
| ICD-10-PCS | 04C94ZZ | Extirpation of Matter from Right Renal Artery            |
| ICD-10-PCS | 04CA0ZZ | Extirpation of Matter from Left Renal Artery             |
| ICD-10-PCS | 04CA4ZZ | Extirpation of Matter from Left Renal Artery             |
| ICD-10-PCS | 04CB0ZZ | Extirpation of Matter from Inferior Mesenteric Artery    |
| ICD-10-PCS | 04CB4ZZ | Extirpation of Matter from Inferior Mesenteric Artery    |
| ICD-10-PCS | 04CC0ZZ | Extirpation of Matter from Right Common Iliac Artery     |
| ICD-10-PCS | 04CC4ZZ | Extirpation of Matter from Right Common Iliac Artery     |
| ICD-10-PCS | 04CD0ZZ | Extirpation of Matter from Left Common Iliac Artery      |
| ICD-10-PCS | 04CD4ZZ | Extirpation of Matter from Left Common Iliac Artery      |
| ICD-10-PCS | 04CE0ZZ | Extirpation of Matter from Right Internal Iliac Artery   |
| ICD-10-PCS | 04CE4ZZ | Extirpation of Matter from Right Internal Iliac Artery   |
| ICD-10-PCS | 04CF0ZZ | Extirpation of Matter from Left Internal Iliac Artery    |
| ICD-10-PCS | 04CF4ZZ | Extirpation of Matter from Left Internal Iliac Artery    |
| ICD-10-PCS | 04CH0ZZ | Extirpation of Matter from Right External Iliac Artery   |
| ICD-10-PCS | 04CH4ZZ | Extirpation of Matter from Right External Iliac Artery   |
| ICD-10-PCS | 04CJ0ZZ | Extirpation of Matter from Left External Iliac Artery    |
| ICD-10-PCS | 04CJ4ZZ | Extirpation of Matter from Left External Iliac Artery    |
| ICD-10-PCS | 04CK0ZZ | Extirpation of Matter from Right Femoral Artery          |
| ICD-10-PCS | 04CK3ZZ | Extirpation of Matter from Right Femoral Artery          |
| ICD-10-PCS | 04CK4ZZ | Extirpation of Matter from Right Femoral Artery          |
| ICD-10-PCS | 04CL0ZZ | Extirpation of Matter from Left Femoral Artery           |
| ICD-10-PCS | 04CL3ZZ | Extirpation of Matter from Left Femoral Artery           |
| ICD-10-PCS | 04CL4ZZ | Extirpation of Matter from Left Femoral Artery           |
| ICD-10-PCS | 04CM0ZZ | Extirpation of Matter from Right Popliteal Artery        |
| ICD-10-PCS | 04CM3ZZ | Extirpation of Matter from Right Popliteal Artery        |
| ICD-10-PCS | 04CM4ZZ | Extirpation of Matter from Right Popliteal Artery        |
| ICD-10-PCS | 04CN0ZZ | Extirpation of Matter from Left Popliteal Artery         |
| ICD-10-PCS | 04CN3ZZ | Extirpation of Matter from Left Popliteal Artery         |
| ICD-10-PCS | 04CN4ZZ | Extirpation of Matter from Left Popliteal Artery         |
| ICD-10-PCS | 04CP0ZZ | Extirpation of Matter from Right Anterior Tibial Artery  |
| ICD-10-PCS | 04CP3ZZ | Extirpation of Matter from Right Anterior Tibial Artery  |
| ICD-10-PCS | 04CP4ZZ | Extirpation of Matter from Right Anterior Tibial Artery  |
| ICD-10-PCS | 04CQ0ZZ | Extirpation of Matter from Left Anterior Tibial Artery   |
| ICD-10-PCS | 04CQ3ZZ | Extirpation of Matter from Left Anterior Tibial Artery   |
| ICD-10-PCS | 04CQ4ZZ | Extirpation of Matter from Left Anterior Tibial Artery   |
| ICD-10-PCS | 04CR0ZZ | Extirpation of Matter from Right Posterior Tibial Artery |
| ICD-10-PCS | 04CR3ZZ | Extirpation of Matter from Right Posterior Tibial Artery |
| ICD-10-PCS | 04CR4ZZ | Extirpation of Matter from Right Posterior Tibial Artery |
| ICD-10-PCS | 04CS0ZZ | Extirpation of Matter from Left Posterior Tibial Artery  |
| ICD-10-PCS | 04CS3ZZ | Extirpation of Matter from Left Posterior Tibial Artery  |
| ICD-10-PCS | 04CS4ZZ | Extirpation of Matter from Left Posterior Tibial Artery  |
| ICD-10-PCS | 04CT0ZZ | Extirpation of Matter from Right Peroneal Artery         |
| ICD-10-PCS | 04CT3ZZ | Extirpation of Matter from Right Peroneal Artery         |
| ICD-10-PCS | 04CT4ZZ | Extirpation of Matter from Right Peroneal Artery         |
| ICD-10-PCS | 04CU0ZZ | Extirpation of Matter from Left Peroneal Artery          |
| ICD-10-PCS | 04CU3ZZ | Extirpation of Matter from Left Peroneal Artery          |
| ICD-10-PCS | 04CU4ZZ | Extirpation of Matter from Left Peroneal Artery          |
| ICD-10-PCS | 04CV0ZZ | Extirpation of Matter from Right Foot Artery             |
| ICD-10-PCS | 04CV3ZZ | Extirpation of Matter from Right Foot Artery             |
| ICD-10-PCS | 04CV4ZZ | Extirpation of Matter from Right Foot Artery             |
| ICD-10-PCS | 04CW0ZZ | Extirpation of Matter from Left Foot Artery              |

|            |         |                                                                                            |
|------------|---------|--------------------------------------------------------------------------------------------|
| ICD-10-PCS | 04CW3ZZ | Extirpation of Matter from Left Foot Artery                                                |
| ICD-10-PCS | 04CW4ZZ | Extirpation of Matter from Left Foot Artery                                                |
| ICD-10-PCS | 04CY0ZZ | Extirpation of Matter from Lower Artery                                                    |
| ICD-10-PCS | 04CY3ZZ | Extirpation of Matter from Lower Artery                                                    |
| ICD-10-PCS | 04CY4ZZ | Extirpation of Matter from Lower Artery                                                    |
| ICD-9-PCS  | 381     | ENDARTERECTOMY                                                                             |
| ICD-9-PCS  | 3811    | ENDARTERECTOMY INTRACRANIAL VESSELS                                                        |
| ICD-9-PCS  | 3812    | Endarterectomy, other vessels of head and neck                                             |
| ICD-9-PCS  | 3813    | ENDARTERECTOMY UPPER LIMB VESSELS                                                          |
| ICD-9-PCS  | 3814    | ENDARTERECTOMY OF AORTA                                                                    |
| ICD-9-PCS  | 3815    | ENDARTERECTOMY OTH THORACIC VESSELS                                                        |
| ICD-9-PCS  | 3816    | ENDARTERECTOMY ABDOMINAL ARTERIES                                                          |
| ICD-9-PCS  | 3818    | ENDARTERECTOMY LOWER LIMB ARTERIES                                                         |
| ICD-10-PCS | 03CG4ZZ | Extirpation of Matter from Intracranial Artery, Percutaneous Endoscopic Approach           |
| ICD-10-PCS | 03CH4ZZ | Extirpation of Matter from Right Common Carotid Artery, Percutaneous Endoscopic Approach   |
| ICD-10-PCS | 03CJ4ZZ | Extirpation of Matter from Left Common Carotid Artery, Percutaneous Endoscopic Approach    |
| ICD-10-PCS | 03CK4ZZ | Extirpation of Matter from Right Internal Carotid Artery, Percutaneous Endoscopic Approach |
| ICD-10-PCS | 03CL4ZZ | Extirpation of Matter from Left Internal Carotid Artery, Percutaneous Endoscopic Approach  |
| ICD-10-PCS | 03CM4ZZ | Extirpation of Matter from Right External Carotid Artery, Percutaneous Endoscopic Approach |
| ICD-10-PCS | 03CN4ZZ | Extirpation of Matter from Left External Carotid Artery, Percutaneous Endoscopic Approach  |
| ICD-10-PCS | 03CP4ZZ | Extirpation of Matter from Right Vertebral Artery, Percutaneous Endoscopic Approach        |
| ICD-10-PCS | 03CQ4ZZ | Extirpation of Matter from Left Vertebral Artery, Percutaneous Endoscopic Approach         |
| ICD-10-PCS | 03CR3ZZ | Extirpation of Matter from Face Artery, Percutaneous Approach                              |
| ICD-10-PCS | 03CR4ZZ | Extirpation of Matter from Face Artery, Percutaneous Endoscopic Approach                   |
| ICD-10-PCS | 03CS3ZZ | Extirpation of Matter from Right Temporal Artery, Percutaneous Approach                    |
| ICD-10-PCS | 03CS4ZZ | Extirpation of Matter from Right Temporal Artery, Percutaneous Endoscopic Approach         |
| ICD-10-PCS | 03CT3ZZ | Extirpation of Matter from Left Temporal Artery, Percutaneous Approach                     |
| ICD-10-PCS | 03CT4ZZ | Extirpation of Matter from Left Temporal Artery, Percutaneous Endoscopic Approach          |
| ICD-10-PCS | 03CU3ZZ | Extirpation of Matter from Right Thyroid Artery, Percutaneous Approach                     |
| ICD-10-PCS | 03CU4ZZ | Extirpation of Matter from Right Thyroid Artery, Percutaneous Endoscopic Approach          |
| ICD-10-PCS | 03CV3ZZ | Extirpation of Matter from Left Thyroid Artery, Percutaneous Approach                      |
| ICD-10-PCS | 03CV4ZZ | Extirpation of Matter from Left Thyroid Artery, Percutaneous Endoscopic Approach           |
| CPT/HCPCS  | 92975   | Thrombolysis, coronary, by intracoronary infusion                                          |
| CPT/HCPCS  | 92977   | Thrombolysis, coronary, by intravenous infusion                                            |
| CPT/HCPCS  | 92920   | PRQ CARDIAC ANGIOPLAST 1 ART                                                               |
| CPT/HCPCS  | 92921   | PRQ CARDIAC ANGIO ADDL ART                                                                 |

|            |         |                                                                                                                               |
|------------|---------|-------------------------------------------------------------------------------------------------------------------------------|
| CPT/HCPCS  | 92924   | PRQ CARD ANGIO/ATHRECT 1 ART                                                                                                  |
| CPT/HCPCS  | 92925   | PRQ CARD ANGIO/ATHRECT ADDL                                                                                                   |
| CPT/HCPCS  | 92937   | PRQ REVASC BYP GRAFT 1 VSL                                                                                                    |
| CPT/HCPCS  | 92938   | PRQ REVASC BYP GRAFT ADDL                                                                                                     |
| CPT/HCPCS  | 92941   | PRQ CARD REVASC MI 1 VSL                                                                                                      |
| CPT/HCPCS  | 92943   | PRQ CARD REVASC CHRONIC 1VSL                                                                                                  |
| CPT/HCPCS  | 92944   | PRQ CARD REVASC CHRONIC ADDL                                                                                                  |
| CPT/HCPCS  | 92973   | PRQ CORONARY MECH THROMBECT                                                                                                   |
| CPT/HCPCS  | 92982   | CORONARY ARTERY DILATION                                                                                                      |
| CPT/HCPCS  | 92984   | CORONARY ARTERY DILATION                                                                                                      |
| CPT/HCPCS  | 92995   | CORONARY ATHERECTOMY                                                                                                          |
| CPT/HCPCS  | 92996   | CORONARY ATHERECTOMY ADD-ON                                                                                                   |
| CPT/HCPCS  | C9600   | PERQ TRANSCATH PLCMT; 1 MAJ CA/BR                                                                                             |
| CPT/HCPCS  | C9601   | PC TRNSCATH PLCMT; EA ADD BR MAJ CA                                                                                           |
| CPT/HCPCS  | C9602   | PERQ TL CORONARY ATHERECT; 1 MCA/BR                                                                                           |
| CPT/HCPCS  | C9603   | PERQ TL COR ATHERECT;EA ADD BR MCA                                                                                            |
| CPT/HCPCS  | C9604   | PERQ TL REVISION OF/THRU CABG;1 VES                                                                                           |
| CPT/HCPCS  | C9605   | PERQ TL REV OF/THRU CABG;EA ADD BR                                                                                            |
| CPT/HCPCS  | C9606   | PC TL REV AC TOT/SUBTOT OCCL 1 VES                                                                                            |
| CPT/HCPCS  | C9607   | PERQ TL REV CHRN TOT OCCL; 1 VESSEL                                                                                           |
| CPT/HCPCS  | C9608   | PC TL REV CHRN TOT OCCL; EA ADD BR                                                                                            |
| CPT/HCPCS  | G0290   | TRNSCATH RX INTRACOR STNT; 1 VES                                                                                              |
| CPT/HCPCS  | G0291   | TRNSCATH RX INTRACOR STNT; EA ADD                                                                                             |
| CPT/HCPCS  | S2220   | THROMBECTOMY, CORONARY                                                                                                        |
| DRG        | 112     | PERCUTANEOUS CARDIOVASCULAR PROCEDURES                                                                                        |
| DRG        | 246     | Percutaneous cardiovascular procedure with drug-eluting stent with major complication or comorbidity or 4+ vessels/stents     |
| DRG        | 247     | Percutaneous cardiovascular procedure with drug-eluting stent without major complication or comorbidity                       |
| DRG        | 248     | Percutaneous cardiovascular procedure with non-drug-eluting stent with major complication or comorbidity or 4+ vessels/stents |
| DRG        | 249     | Percutaneous cardiovascular procedure with non-drug-eluting stent without major complication or comorbidity                   |
| DRG        | 273     | Percutaneous intracardiac procedures with MCC                                                                                 |
| DRG        | 274     | Percutaneous intracardiac procedures without MCC                                                                              |
| DRG        | 286     | Circulatory disorders except acute myocardial infarction, with cardiac catheterization with MCC                               |
| DRG        | 287     | Circulatory disorders except acute myocardial infarction, with cardiac catheterization without MCC                            |
| DRG        | 516     | PERCUTANEOUS CARDIOVASC PROC W AMI                                                                                            |
| ICD-10-PCS | 027034Z | DIL CA 1 ART RX-ELUT IL DEVC PERQ                                                                                             |
| ICD-10-PCS | 027035Z | DILAT CA 1 ART 2 RX-ELUT IL DEVC PC                                                                                           |
| ICD-10-PCS | 027036Z | DILAT CA 1 ART 3 RX-ELUT IL DEVC PC                                                                                           |
| ICD-10-PCS | 027037Z | DIL CA 1 ART 4/> RX-ELUT IL DEVC PC                                                                                           |
| ICD-10-PCS | 02703D6 | DILATION CA 1 ART BIF IL DEVC PERQ                                                                                            |
| ICD-10-PCS | 02703DZ | DILATION CA 1 ART INTRALUM DEVC PC                                                                                            |
| ICD-10-PCS | 02703EZ | DIL CORONARY ART 1 ART 2 IL DEVC PC                                                                                           |
| ICD-10-PCS | 02703F6 | DIL COR ART 1 ART BIF 3 IL DEVC PC                                                                                            |
| ICD-10-PCS | 02703FZ | DILAT COR ART 1 ART 3 IL DEVC PERQ                                                                                            |
| ICD-10-PCS | 02703G6 | DIL COR ART 1 ART BIF 4/> IL DVC PC                                                                                           |
| ICD-10-PCS | 02703GZ | DILAT COR ART 1 ART 4/> IL DEVC PC                                                                                            |
| ICD-10-PCS | 02703T6 | DIL CA 1 ART BIF RAD IL DEVC PERQ                                                                                             |



|            |         |                                     |
|------------|---------|-------------------------------------|
| ICD-10-PCS | 02703TZ | DILATION CA 1 ART RAD IL DEVC PERQ  |
| ICD-10-PCS | 02703Z6 | DILATION COR ART 1 ARTERY BIF PERQ  |
| ICD-10-PCS | 02703ZZ | DILATION CORONARY ARTERY 1 ART PERQ |
| ICD-10-PCS | 027044Z | DIL CA 1 ART RX-ELUT IL DVC PC ENDO |
| ICD-10-PCS | 027045Z | DIL CA 1 A 2 RX-ELUT IL DVC PC ENDO |
| ICD-10-PCS | 027046Z | DIL CA 1 A 3 RX-ELUT IL DVC PC ENDO |
| ICD-10-PCS | 027047Z | DIL CA 1 ART 4/> RX-ELUT IL DVC PE  |
| ICD-10-PCS | 02704D6 | DIL CA 1 ART BIF IL DEVC PERQ ENDO  |
| ICD-10-PCS | 02704DZ | DIL CA 1 ARTERY IL DEVC PERQ ENDO   |
| ICD-10-PCS | 02704EZ | DILAT CA 1 ART 2 IL DEVC PERQ ENDO  |
| ICD-10-PCS | 02704F6 | DIL CA 1 ART BIF 3 IL DEVC PC ENDO  |
| ICD-10-PCS | 02704FZ | DILAT CA 1 ART 3 IL DEVC PERQ ENDO  |
| ICD-10-PCS | 02704G6 | DIL CA 1 ART BIF 4/> IL DVC PC ENDO |
| ICD-10-PCS | 02704GZ | DILAT CA 1 ART 4/> IL DEVC PC ENDO  |
| ICD-10-PCS | 02704T6 | DIL CA 1 ART BIF RAD IL DVC PC ENDO |
| ICD-10-PCS | 02704TZ | DIL CA 1 ART RAD IL DEVC PERQ ENDO  |
| ICD-10-PCS | 02704Z6 | DILATION COR ART 1 ART BIF PC ENDO  |
| ICD-10-PCS | 02704ZZ | DILATION COR ART 1 ARTERY PERQ ENDO |
| ICD-10-PCS | 027134Z | DIL CA 2 ART RX-ELUT IL DEVICE PERQ |
| ICD-10-PCS | 027135Z | DIL CA 2 ART 2 RX-ELUT IL DEVC PERQ |
| ICD-10-PCS | 027136Z | DIL CA 2 ART 3 RX-ELUT IL DEVC PERQ |
| ICD-10-PCS | 027137Z | DIL CA 2 ART 4/> RX-ELUT IL DEVC PC |
| ICD-10-PCS | 02713D6 | DIL COR ART 2 ART BIF IL DEVC PERQ  |
| ICD-10-PCS | 02713DZ | DIL COR ARTERY 2 ART IL DEVICE PERQ |
| ICD-10-PCS | 02713EZ | DIL CORONARY ART 2 ART 3 IL DEVC PC |
| ICD-10-PCS | 02713F6 | DIL COR ART 2 ART BIF 3 IL DEVC PC  |
| ICD-10-PCS | 02713FZ | DIL CORONARY ART 2 ART 3 IL DEVC PC |
| ICD-10-PCS | 02713G6 | DIL COR ART 2 ART BIF 4/> IL DVC PC |
| ICD-10-PCS | 02713GZ | DIL CORONARY ART 2 ART 4/>IL DVC PC |
| ICD-10-PCS | 02713T6 | DIL CA 2 ART BIF RAD IL DEVICE PERQ |
| ICD-10-PCS | 02713TZ | DIL COR ART 2 ART RAD IL DEVC PERQ  |
| ICD-10-PCS | 02713Z6 | DILATION COR ART 2 ARTERIES BIF PC  |
| ICD-10-PCS | 02713ZZ | DILATION CORONARY ARTERY 2 ART PERQ |
| ICD-10-PCS | 027144Z | DIL CA 2 ART RX-ELUT IL DVC PC ENDO |
| ICD-10-PCS | 027145Z | DIL COR ART 2 A 2 RX-ELUT IL DVC PE |
| ICD-10-PCS | 027146Z | DILAT CA 2 ART 3 RX-ELUT IL DEVC PE |
| ICD-10-PCS | 027147Z | DIL CA 2 ART 4/> RX-ELUT IL DEVC PE |
| ICD-10-PCS | 02714D6 | DIL CA 2 ART BIF IL DEVC PERQ ENDO  |
| ICD-10-PCS | 02714DZ | DIL COR ART 2 ART IL DEVC PERQ ENDO |
| ICD-10-PCS | 02714EZ | DIL COR ART 2 ART 2 IL DEVC PC ENDO |
| ICD-10-PCS | 02714F6 | DIL CA 2 ART BIF 3 IL DEVC PC ENDO  |
| ICD-10-PCS | 02714FZ | DIL COR ART 2 ART 3 IL DEVC PC ENDO |
| ICD-10-PCS | 02714G6 | DIL CA 2 ART 4/> IL DEVC PERQ ENDO  |
| ICD-10-PCS | 02714GZ | DIL CA 2 ART 4/> IL DEVC PERQ ENDO  |
| ICD-10-PCS | 02714T6 | DIL CA 2 ART BIF RAD IL DVC PC ENDO |
| ICD-10-PCS | 02714TZ | DIL CA 2 ART RAD IL DEVC PERQ ENDO  |
| ICD-10-PCS | 02714Z6 | DIL CORONARY ART 2 ART BIF PC ENDO  |
| ICD-10-PCS | 02714ZZ | DIL CORONARY ARTERY 2 ART PERQ ENDO |
| ICD-10-PCS | 027234Z | DIL CA 3 ART RX-ELUT IL DEVICE PERQ |
| ICD-10-PCS | 027235Z | DIL CA 3 ART 2 RX-ELUT IL DEVC PERQ |
| ICD-10-PCS | 027236Z | DIL CA 3 ART 3 RX-ELUT IL DEVC PERQ |
| ICD-10-PCS | 027237Z | DIL CA 3 ART 4/> RX-ELUT IL DEVC PC |
| ICD-10-PCS | 02723D6 | DIL CA 3 ART BIF INTRALUM DEVC PERQ |

|            |         |                                     |
|------------|---------|-------------------------------------|
| ICD-10-PCS | 02723DZ | DIL CA 3 ARTERIES INTRALUM DEVC PC  |
| ICD-10-PCS | 02723EZ | DILAT CA 3 ART 2 IL DEVICE PERQ     |
| ICD-10-PCS | 02723F6 | DIL COR ART 3 ART BIF 3 IL DEVC PC  |
| ICD-10-PCS | 02723FZ | DIL CORONARY ART 3 ART 3 IL DEVC PC |
| ICD-10-PCS | 02723G6 | DIL COR ART 3 ART BIF 4/> IL DVC PC |
| ICD-10-PCS | 02723GZ | DIL COR ART 3 ART 4/> IL DEVC PERQ  |
| ICD-10-PCS | 02723T6 | DIL CA 3 ART BIF RAD IL DEVICE PERQ |
| ICD-10-PCS | 02723TZ | DIL CA 3 ART RAD INTRALUM DEVC PERQ |
| ICD-10-PCS | 02723Z6 | DIL CA 3 ARTERIES BIFURCATION PERQ  |
| ICD-10-PCS | 02723ZZ | DILATION CORONARY ARTERY 3 ART PERQ |
| ICD-10-PCS | 027244Z | DIL CA 3 ART RX-ELUT IL DVC PC ENDO |
| ICD-10-PCS | 027245Z | DIL CA 3 ART 2 RX-ELUT IL DEVC PE   |
| ICD-10-PCS | 027246Z | DIL CA 3 ART 3 RX-ELUT IL DEVICE PE |
| ICD-10-PCS | 027247Z | DIL CA 3 ART 4/> RX-ELUT IL DEVC PE |
| ICD-10-PCS | 02724D6 | DIL COR ART 3 ART BIF IL D PC ENDO  |
| ICD-10-PCS | 02724DZ | DIL COR ART 3 ART IL DEVC PERQ ENDO |
| ICD-10-PCS | 02724EZ | DILAT CA 3 ART 2 IL DEVC PERQ ENDO  |
| ICD-10-PCS | 02724F6 | DIL CA 3 ART BIF 3 IL DVC PERQ ENDO |
| ICD-10-PCS | 02724FZ | DILAT CA 3 ART 3 IL DEVC PERQ ENDO  |
| ICD-10-PCS | 02724G6 | DIL CA 3 ART BIF 4/> IL DVC PC ENDO |
| ICD-10-PCS | 02724GZ | DILAT CA 3 ART 4/> IL DEVC PC ENDO  |
| ICD-10-PCS | 02724T6 | DIL CA 3 ART BIF RAD IL DVC PC ENDO |
| ICD-10-PCS | 02724TZ | DIL CA 3 ART RAD IL DEVICE PC ENDO  |
| ICD-10-PCS | 02724Z6 | DILATION CA 3 ARTERIES BIF PC ENDO  |
| ICD-10-PCS | 02724ZZ | DIL CORONARY ARTERY 3 ART PERQ ENDO |
| ICD-10-PCS | 027334Z | DIL CA 4/> ART RX-ELUT IL DEVC PERQ |
| ICD-10-PCS | 027335Z | DIL CA 4/> ART 2 RX-ELUT IL DEVC PC |
| ICD-10-PCS | 027336Z | DIL CA 4/> ART 3 RX-ELUT IL DEVC PC |
| ICD-10-PCS | 027337Z | DIL CA 4/> A 4/> RX-ELUT IL DEVC PE |
| ICD-10-PCS | 02733D6 | DIL COR ART 4/> ART BIF IL DEVC PC  |
| ICD-10-PCS | 02733DZ | DIL COR ARTERY 4/> ART IL DEVC PERQ |
| ICD-10-PCS | 02733EZ | DIL COR ART 4/> ART 2 IL DEVC PERQ  |
| ICD-10-PCS | 02733F6 | DIL COR ART 4/> ART BIF 3 IL DVC PC |
| ICD-10-PCS | 02733FZ | DIL COR ART 4/> ART 3 IL DEVC PERQ  |
| ICD-10-PCS | 02733G6 | DIL CA 4/> ART BIF 4/> IL DEVC PERQ |
| ICD-10-PCS | 02733GZ | DIL COR ART 4/> ART 4/> IL DVC PERQ |
| ICD-10-PCS | 02733T6 | DIL CA 4/> ART BIF RAD IL DEVC PERQ |
| ICD-10-PCS | 02733TZ | DIL COR ART 4/> ART RAD IL DEVC PC  |
| ICD-10-PCS | 02733Z6 | DIL COR ART 4/> ARTERIES BIF PERQ   |
| ICD-10-PCS | 02733ZZ | DIL CORONARY ART 4/> ARTERIES PERQ  |
| ICD-10-PCS | 027344Z | DIL CA 4/> ART RX-ELUT IL DVC PC E  |
| ICD-10-PCS | 027345Z | DIL CA 4/> ART 2 RX-ELUT IL DEVC PE |
| ICD-10-PCS | 027346Z | DIL CA 4/> ART 3 RX-ELUT IL DEVC PE |
| ICD-10-PCS | 027347Z | DIL CA 4/> A 4/> RX-ELUT IL DEVC PE |
| ICD-10-PCS | 02734D6 | DIL CA 4/> ART BIF IL DEVC PC ENDO  |
| ICD-10-PCS | 02734DZ | DIL CA 4/> ARTERY IL DEVC PC ENDO   |
| ICD-10-PCS | 02734EZ | DIL CORONARY ART 4/> A 2 IL DEVC PE |
| ICD-10-PCS | 02734F6 | DIL COR ART 4/>ART BIF 3 IL DEVC PE |
| ICD-10-PCS | 02734FZ | DIL COR ART 4/> ART 3 IL DEVC PE    |
| ICD-10-PCS | 02734G6 | DIL CA 4/> ART BIF 4/> IL DEVC PE   |
| ICD-10-PCS | 02734GZ | DIL COR ART 4/>ART 4/> IL DEVC PE   |
| ICD-10-PCS | 02734T6 | DIL CA 4/> ART BIF RA IL PERQ ENDO  |
| ICD-10-PCS | 02734TZ | DIL CA 4/> ART RA IL DEVC PERQ ENDO |

|            |            |                                     |
|------------|------------|-------------------------------------|
| ICD-10-PCS | 02734Z6    | DILAT COR ART 4/> ART BIF PC ENDO   |
| ICD-10-PCS | 02734ZZ    | DIL COR ART 4/MORE ART PERQ ENDO    |
| ICD-10-PCS | 02C03Z6    | EXTIRPAT MATTR COR ART 1 ART BIF PC |
| ICD-10-PCS | 02C03ZZ    | EXTIRPAT MATTER COR ART 1 ART PERQ  |
| ICD-10-PCS | 02C04Z6    | EXTIRPAT MATTER COR ART 1 A BIF PE  |
| ICD-10-PCS | 02C04ZZ    | EXTIRPAT MATTER CA 1 ART PERQ ENDO  |
| ICD-10-PCS | 02C13Z6    | EXTIRPATION MATTER CA 2 ART BIF PC  |
| ICD-10-PCS | 02C13ZZ    | EXTIRPAT MATTER COR ART 2 ART PERQ  |
| ICD-10-PCS | 02C14Z6    | EXTIRPAT MATTR COR ART 2 ART BIF PE |
| ICD-10-PCS | 02C14ZZ    | EXTIRPAT MATTER CA 2 ART PERQ ENDO  |
| ICD-10-PCS | 02C23Z6    | EXTIRPAT MATTR COR ART 3 ART BIF PC |
| ICD-10-PCS | 02C23ZZ    | EXTIRPAT MATTER COR ART 3 ART PERQ  |
| ICD-10-PCS | 02C24Z6    | EXTIRPAT MATTR COR ART 3 ART BIF PE |
| ICD-10-PCS | 02C24ZZ    | EXTIRPAT MATTER CA 3 AART PERQ ENDO |
| ICD-10-PCS | 02C33Z6    | EXTIRPAT MATTR COR ART 4/> A BIF PC |
| ICD-10-PCS | 02C33ZZ    | EXTIRPATION MATTER CA 4/> ART PERQ  |
| ICD-10-PCS | 02C34Z6    | EXTIRPAT MATTR COR ART 4/> A BIF PE |
| ICD-10-PCS | 02C34ZZ    | EXTIRPAT MATTER CA 4/> ART PC ENDO  |
| ICD-10-PCS | 02N43ZZ    | RELEASE CORONARY VEIN PERCUTANEOUS  |
| ICD-10-PCS | 02Q43ZZ    | REPAIR CORONARY VEIN PERCUTANEOUS   |
| ICD-10-PCS | 2703000000 | DIL COR ART 1 ART BIF 2 IL DEVC PC  |
| ICD-10-PCS | 270346     | DIL CA 1 ART BIF RX-ELUT IL DEVC PC |
| ICD-10-PCS | 270356     | DIL CA 1 A BIF 2 RX-ELUT IL DEVC PC |
| ICD-10-PCS | 270366     | DIL CA 1 A BIF 3 RX-ELUT IL DEVC PC |
| ICD-10-PCS | 270376     | DIL CA 1 A BIF 4/>RX-ELUT IL DVC PC |
| ICD-10-PCS | 2704000000 | DILAT CA 1 ART BIF W IL DVC PC ENDO |
| ICD-10-PCS | 270446     | DIL CA 1 ART BIF RX-ELUT IL PC ENDO |
| ICD-10-PCS | 270456     | DIL CA 1 A BIF 2 RX-ELUT IL DVC PE  |
| ICD-10-PCS | 270466     | DIL CA 1 A BIF 3 RX-ELUT IL DEVC PE |
| ICD-10-PCS | 270476     | DIL CA 1 A BIF 4/>RX-ELUT IL DVC PE |
| ICD-10-PCS | 2713000000 | DILAT COR ART 2 ART BIF 2 IL DVC PC |
| ICD-10-PCS | 271346     | DIL CA 2 ART BIF RX-ELUT IL DEVC PC |
| ICD-10-PCS | 271356     | DIL CA 2 A BIF 2 RX-ELUT IL DEVC PC |
| ICD-10-PCS | 271366     | DIL CA 2 A BIF 3 RX-ELUT IL DEVC PC |
| ICD-10-PCS | 271376     | DIL CA 2 A BIF 4/>RX-ELUT IL DVC PC |
| ICD-10-PCS | 2714000000 | DIL CA 2 ART BIF 2 IL DVC PERQ ENDO |
| ICD-10-PCS | 271446     | DIL CA 2 ART BIF RX-ELUT IL D PC E  |
| ICD-10-PCS | 271456     | DIL CA 2 A BIF 2 RX-ELUT IL DEVC PE |
| ICD-10-PCS | 271466     | DIL CA 2 A BIF 3 RX-ELUT IL DEVC PE |
| ICD-10-PCS | 271476     | DIL CA 2 A BIF 4/>RX-ELUT IL DVC PE |
| ICD-10-PCS | 2723000000 | DIL COR ART 3 ART BIF 2 IL DEVC PC  |
| ICD-10-PCS | 272346     | DIL CA 3 ART BIF RX-ELUT IL DEVC PC |
| ICD-10-PCS | 272366     | DIL CA 3 A BIF 3 RX-ELUT IL DVC PC  |
| ICD-10-PCS | 272376     | DIL CA 3 A BIF 4/>RX-ELUT IL DVC PC |
| ICD-10-PCS | 2724000000 | DIL CA 3 ART BIF 2 IL DVC PERQ ENDO |
| ICD-10-PCS | 272446     | DIL CA 3 ART BIF RX-ELUT IL D PC E  |
| ICD-10-PCS | 272456     | DIL CA 3 A BIF 2 RX-ELUT IL DVC PE  |
| ICD-10-PCS | 272466     | DIL CA 3 A BIF 3 RX-ELUT IL DVC PE  |
| ICD-10-PCS | 272476     | DIL CA 3 A BIF 4/>RX-ELUT IL DVC PE |
| ICD-10-PCS | 2733000000 | DILAT CA 4/> ART BIF 2 IL DEVC PERQ |
| ICD-10-PCS | 273346     | DIL CA 4/> ART BIF RX-ELUT IL D PC  |
| ICD-10-PCS | 273356     | DIL CA 4/>A BIF 2 RX-ELUT IL DVC PC |
| ICD-10-PCS | 273366     | DIL CA 4/>A BIF 3 RX-ELUT IL DVC PC |

|            |            |                                                                                 |
|------------|------------|---------------------------------------------------------------------------------|
| ICD-10-PCS | 273376     | D CA 4/>A BIF 4/>RX-ELUT IL DVC PC                                              |
| ICD-10-PCS | 2734000000 | DIL COR ART 4/> A BIF 2 IL DEVC PE                                              |
| ICD-10-PCS | 273446     | DIL CA 4/>ART BIF RX-ELUT IL D PC E                                             |
| ICD-10-PCS | 273456     | DIL CA 4/>A BIF 2 RX-ELUT IL DVC PE                                             |
| ICD-10-PCS | 273466     | DIL CA 4/>A BIF 3 RX-ELUT IL DVC PE                                             |
| ICD-10-PCS | 273476     | DIL CA 4/>A BIF 4/>RX-ELT IL DVC PE                                             |
| ICD-9-PCS  | 3601       | PTCA/COR ATH-LVSL NO LYS                                                        |
| ICD-9-PCS  | 3602       | PTCA/COR ATH-1 VSL W/LYS                                                        |
| ICD-9-PCS  | 3605       | PTCA/COR ATH-MULT VESSEL                                                        |
| CPT/HCPCS  | 92928      | PRQ CARD STENT W/ANGIO 1 VSL                                                    |
| CPT/HCPCS  | 92929      | PRQ CARD STENT W/ANGIO ADDL                                                     |
| CPT/HCPCS  | 92933      | PRQ CARD STENT/ATH/ANGIO                                                        |
| CPT/HCPCS  | 92934      | PRQ CARD STENT/ATH/ANGIO                                                        |
| CPT/HCPCS  | 92980      | INSERT INTRACORONARY STENT                                                      |
| CPT/HCPCS  | 92981      | INSERT INTRACORONARY STENT                                                      |
| CPT/HCPCS  | 35880      | THROMBECTOMY ARTERIAL GR                                                        |
| CPT/HCPCS  | 37186      | SEC ART THROMBECTOMY ADD-ON                                                     |
| CPT/HCPCS  | 37187      | VENOUS MECH THROMBECTOMY                                                        |
| CPT/HCPCS  | 37188      | VENOUS M-THROMBECTOMY ADD-ON                                                    |
| CPT/HCPCS  | C1051      | OASIS THROMBECTOMY CATH                                                         |
| ICD-10-PCS | 03CG3ZZ    | Extirpation of Matter from Intracranial Artery, Percutaneous Approach           |
| ICD-10-PCS | 03CH3ZZ    | Extirpation of Matter from Right Common Carotid Artery, Percutaneous Approach   |
| ICD-10-PCS | 03CJ3ZZ    | Extirpation of Matter from Left Common Carotid Artery, Percutaneous Approach    |
| ICD-10-PCS | 03CK3ZZ    | Extirpation of Matter from Right Internal Carotid Artery, Percutaneous Approach |
| ICD-10-PCS | 03CL3ZZ    | Extirpation of Matter from Left Internal Carotid Artery, Percutaneous Approach  |
| ICD-10-PCS | 03CM3ZZ    | Extirpation of Matter from Right External Carotid Artery, Percutaneous Approach |
| ICD-10-PCS | 03CN3ZZ    | Extirpation of Matter from Left External Carotid Artery, Percutaneous Approach  |
| ICD-10-PCS | 03CP3ZZ    | Extirpation of Matter from Right Vertebral Artery, Percutaneous Approach        |
| ICD-10-PCS | 03CQ3ZZ    | Extirpation of Matter from Left Vertebral Artery, Percutaneous Approach         |
| ICD-9-PCS  | 3974       | Endovascular removal of obstruction from head and neck vessel(s)                |
